# Supplementary material for: Two Distinct Fetal-Type Signatures Caracterise Juvenile Myelomonocytic Leukemia
Source: Research Square preprint supplement (doi:10.21203/rs.3.rs-1416605/v1), 2022-03-10
Supplement: Supplementary file 1 [file 29139808287ae69398dfacff.xlsx]

## Sheet: Prenatal vs Postnatal BM
Gene name	Gene_biotype	Gene_position	FPKM.JMML_Postanal BM	FPKM.JMML_Prenatal	log2FC	pval	qval
IGF2BP1	protein_coding	9109	0.0085794	39.2217	12.0347	3.59178e-17	5.51447e-13
IGF2	protein_coding	6259	0.0450552	84.7271	10.0646	0.00119818	0.00715683
LIN28B	protein_coding	6002	0.00514476	7.6626	9.36683	1.77692e-18	5.4562e-14
LYVE1	protein_coding	3515	0.0164199	20.7255	8.62981	6.366e-09	2.50608e-06
KDR	protein_coding	6259	0.0457238	18.0417	8.06255	6.42559e-05	0.00138265
DLK1	protein_coding	5312	0.295807	17.1701	7.92876	8.09164667153701e-10	5.77819e-07
COL4A1	protein_coding	8188	0.0351205	10.2638	7.85712	3.25187e-06	0.000178307
RELN	protein_coding	12642	0.0138608	9.65674	7.83639	0.000239267	0.00308047
HSPA6	protein_coding	2371	0.0351176	288.999	7.74945	0.00198835	0.00927594
CDH5	protein_coding	5972	0.0369856	10.2019	7.59135	1.0118e-05	0.000397803
COL1A2	protein_coding	11156	0.0251793	18.7428	7.54136	0.000367414	0.00403932
STAB2	protein_coding	9288	0.0695202	17.5139	7.52989	0.00062307	0.0052279
IGFBP3	protein_coding	4571	0.173577	22.4249	7.52708	4.21013e-06	0.000212975
A2M	protein_coding	6384	0.0600976	12.6567	7.49678	3.89132e-06	0.000201836
HBG1	protein_coding	808	0.399957	95.789	7.49182	0.000223447	0.00294092
HBG2	protein_coding	2027	0.431654	113.96	7.45665	0.00414908	0.0152632
COL4A2	protein_coding	8706	0.0533176	9.95939	7.45013	5.42341e-05	0.00124277
NR2F2	protein_coding	6459	0.00484935	3.25578	7.39591	1.90200890904778e-10	2.24627e-07
LIFR	protein_coding	11864	0.00221623	1.83278	7.34475	1.98580145616131e-10	2.25837e-07
OIT3	protein_coding	2365	0.0292264	26.6976	7.15446	1.12817e-05	0.000431938
COL1A1	protein_coding	9819	0.0911606	41.7031	7.07225	0.000568328	0.00495321
PCDH17	protein_coding	8326	0.0165676	2.09434	6.9486	5.01782e-11	1.18521e-07
MMRN2	protein_coding	5334	0.0126985	5.39157	6.93972	6.55856e-09	2.54921e-06
SNHG23	lincRNA	10548	0.056388	2.61486	6.9237	3.70815e-09	1.69944e-06
SASH1	protein_coding	11143	0.0298758	2.46136	6.83028	1.10926e-07	1.7378e-05
COL3A1	protein_coding	6811	0.0188721	7.78512	6.80112	4.75864e-07	4.84283e-05
PTPRB	protein_coding	14542	0.0243452	2.68006	6.79048	1.12071e-06	8.62467e-05
C8orf4	protein_coding	1854	0.0670295	11.5802	6.72395	4.58827e-08	9.90913e-06
C1QC	protein_coding	1335	0.135589	85.103	6.69848	6.34317e-05	0.00137164
IGFBP4	protein_coding	2200	0.358446	19.8715	6.6287	6.74232e-07	6.1616e-05
ADM	protein_coding	2718	0.184299	12.4061	6.52916	5.49775e-07	5.31987e-05
HMOX1	protein_coding	2405	0.381163	59.0386	6.52848	0.000754159	0.00586386
ROBO2	protein_coding	16663	0.00854727	2.10632	6.50316	1.93295e-05	0.000625428
COL4A5	protein_coding	8738	0.0666979	3.46255	6.46501	1.051e-11	3.22721e-08
APLNR	protein_coding	3738	0.0694319	8.70504	6.33488	2.45767e-05	0.000732671
FEZ1	protein_coding	5937	0.0301813	2.68304	6.32818	5.45503e-08	1.05282e-05
CCL4	protein_coding	2032	0.0337799	11.3703	6.32415	3.06912e-07	3.61631e-05
NRP2	protein_coding	13896	0.0587218	4.50364	6.31867	3.685e-06	0.000194753
CCL3	protein_coding	1494	0.438598	37.3834	6.23919	5.03737e-05	0.00118074
TFPI2	protein_coding	2663	0	2.03883	6.21228	4.42125e-14	3.39396915171299e-10
RRAD	protein_coding	1709	0.136821	18.2017	6.16442	0.000101838	0.00183692
MEG3	lincRNA	15769	0.817877	18.6617	6.14371	2.07947e-09	1.16095e-06
CXCL1	protein_coding	1296	0.0244986	7.29432	6.082	6.52789e-12	2.50557e-08
RBP1	protein_coding	3905	0.0114242	2.08017	6.06934	1.19265284203146e-10	1.66462e-07
NR2F1	protein_coding	4201	0.0136002	2.57842	6.00024	2.28159e-09	1.18743e-06
TJP1	protein_coding	11265	0.0290162	1.84041	5.99791	1.90035e-07	2.59343e-05
ARC	protein_coding	2991	0.101331	16.9664	5.99736	0.000217661	0.00289843
ADGRL2	protein_coding	7754	0.0269558	1.34522	5.94691	8.40653e-09	3.04962e-06
LRRC32	protein_coding	4459	0.119669	4.53247	5.94126	3.72279e-08	8.66e-06
FERMT2	protein_coding	8510	0.0246145	1.49364	5.90678	4.82688e-08	1.01113e-05
KIAA1217	protein_coding	10807	0.0682177	2.40511	5.90208	2.83969e-08	7.32736e-06
NUAK1	protein_coding	7008	0.00143515	0.758597	5.89189	7.16672e-13	4.40123e-09
THBS1	protein_coding	9158	2.08296	78.2697	5.87446	0.00098858	0.00695267
SPP1	protein_coding	2321	0.092979	15.0559	5.85256	5.87669e-05	0.00131236
ITGA1	protein_coding	18566	0.0183435	0.766928	5.82624	5.39376e-08	1.05095e-05
IL33	protein_coding	3253	0.0305756	3.34202	5.82133	6.959e-08	1.27954e-05
PCDH7	protein_coding	12249	0.0114177	1.00672	5.82039	1.08477e-07	1.71696e-05
FLT1	protein_coding	12567	0.0891383	2.97865	5.82029	4.09799e-07	4.39975e-05
CD276	protein_coding	5542	0.0260577	2.30828	5.80104	3.44992e-07	3.92345e-05
NR5A2	protein_coding	7559	0.00771839	0.974203	5.78486	1.39832e-09	9.13552e-07
DUSP8	protein_coding	4616	0.0971441	7.5568	5.77379	3.3989e-05	0.000910705
XIRP1	protein_coding	6467	0.0812886	5.34178	5.7388	7.41896e-05	0.00151812
MAFB	protein_coding	3393	0.627377	28.3321	5.72182	0.00010502	0.00187485
DNASE1L3	protein_coding	3148	0.233512	12.1047	5.66999	0.000156494	0.00238358
ADGRF5	protein_coding	6650	0.0292426	1.88562	5.64599	1.22002e-06	9.17096e-05
GPR182	protein_coding	3451	0.00894219	2.90176	5.62074	6.08841e-08	1.13994e-05
PCDH10	protein_coding	10161	0.0216873	1.09446	5.61248	7.38365409276649e-10	5.66806e-07
CXCL3	protein_coding	2219	0.6984	21.0534	5.57669	3.91082e-08	8.96161e-06
BMPER	protein_coding	5888	0.0100062	1.33445	5.55853	3.15705e-08	7.86299e-06
BTNL9	protein_coding	5565	0.0117254	1.42439	5.54635	2.2289e-09	1.18743e-06
LDB2	protein_coding	5586	0.169832	3.93442	5.5094	1.05316e-05	0.000410386
C1QB	protein_coding	1601	0.132455	61.128	5.49292	0.000910346	0.00662579
NCKAP5	protein_coding	9552	0.00975619	2.01317	5.49044	2.9411e-06	0.000165706
HIF3A	protein_coding	8371	0.0178165	1.03423	5.47824	2.82149e-07	3.42438e-05
MAF	protein_coding	6976	0.326248	20.441	5.45692	6.10026e-05	0.00134209
FCN2	protein_coding	1057	0	8.73055	5.44145	7.31201e-08	1.32072e-05
CXCL12	protein_coding	6077	0.0362613	5.03615	5.40351	0.000104864	0.00187424
CXCL16	protein_coding	2794	0.165848	5.79722	5.38684	1.79981e-06	0.000118594
TEAD1	protein_coding	10279	0.00308829	0.417838	5.3843	1.85e-11	5.16419e-08
PHLDA1	protein_coding	8069	0.305079	13.0618	5.37915	6.0406e-07	5.67839e-05
UNC5C	protein_coding	10685	0.00713184	0.554019	5.37396	1.67338440720071e-10	2.14096e-07
BGN	protein_coding	2453	0.102191	4.55028	5.35721	1.3923e-06	9.91922e-05
CLDN5	protein_coding	3429	0.0975354	4.97142	5.35447	3.1217e-05	0.000857379
MEIS2	protein_coding	10798	0.0777693	2.20148	5.34811	0.000184798	0.00262662
ADRA2B	protein_coding	3362	0.0806194	6.18874	5.34593	6.72636e-06	0.000296326
RAMP2	protein_coding	1148	0.102736	6.94475	5.34384	1.64711e-07	2.29892e-05
PDGFB	protein_coding	3761	0.0484887	1.56721	5.33664	1.11838e-09	7.46625e-07
MCAM	protein_coding	7422	0.0908348	2.40579	5.33484	2.38046e-08	6.7059e-06
FCN3	protein_coding	2167	0.0918799	9.36192	5.32683	5.23552e-05	0.00121238
EDNRB	protein_coding	5014	0.0120821	1.46572	5.32009	7.27102e-08	1.32072e-05
PLPP3	protein_coding	5286	0.201555	7.41588	5.30812	2.66611e-06	0.000154487
MYL4	protein_coding	1636	1.24309	13.9371	5.30667	1.2091e-05	0.000454427
C3	protein_coding	8328	0.0232941	1.69151	5.29472	2.7682e-05	0.000794396
TCF7L1	protein_coding	4414	0.0434171	1.44759	5.26588	7.63488e-11	1.37904e-07
CALD1	protein_coding	9843	0.148644	4.70938	5.26508	0.000822507	0.00619321
ITGA8	protein_coding	7528	0.00396319	0.712071	5.2385	7.94768e-09	3.01286e-06
SHE	protein_coding	8441	0.255406	2.43184	5.22927	3.93508e-05	0.00100191
SFRP1	protein_coding	4761	0.00333381	1.48782	5.22114	5.84271e-09	2.42441e-06
MAP1B	protein_coding	12630	0.0609762	1.87421	5.21699	4.8703e-06	0.000234181
GATA4	protein_coding	4443	0.0100658	1.78217	5.21665	2.6837e-07	3.32281e-05
C1QA	protein_coding	1272	0.104964	38.6258	5.21352	0.00015416	0.00236107
CD163L1	protein_coding	5690	0.0421612	6.45168	5.20799	9.74445e-05	0.00178209
SHC2	protein_coding	4131	0.00730393	1.46819	5.20624	3.18032e-08	7.86299e-06
SLCO2B1	protein_coding	10351	0.16474	4.14071	5.20362	0.000821507	0.0061872
NRP1	protein_coding	11522	0.635519	9.2908	5.20065	0.000401861	0.00423539
PCDH12	protein_coding	6820	0.0823269	2.50661	5.17944	1.77989e-05	0.000584814
PTX3	protein_coding	1940	0.890581	40.3933	5.15889	2.047e-06	0.000129866
SLIT2	protein_coding	9712	0.015791	0.721464	5.13847	5.94375e-09	2.43345e-06
CLEC4M	protein_coding	4066	0.0365418	2.09121	5.12173	6.64026e-07	6.088e-05
TNFSF9	protein_coding	1665	0.499224	16.9002	5.11041	9.02428e-07	7.38933e-05
NPR1	protein_coding	5003	0.050408	3.62952	5.10412	6.46692e-05	0.00138693
MYO6	protein_coding	8785	0.0355846	1.19483	5.09871	1.71654e-06	0.000115668
NPPC	protein_coding	1071	0.185277	14.3257	5.08863	2.30711e-06	0.000141119
CTTNBP2	protein_coding	7035	0.0781735	2.39293	5.0811	3.48332e-05	0.00092365
PKDCC	protein_coding	3925	0.0127893	0.822711	5.08029	6.91788e-11	1.37904e-07
TNF	protein_coding	1676	1.30705	29.5093	5.07984	0.000547489	0.0048714
DLL4	protein_coding	4753	0.101144	2.54411	5.07037	5.27461e-06	0.000247648
PGF	protein_coding	5962	0.0323817	1.94743	5.03792	1.37488e-06	9.82706e-05
ARL4D	protein_coding	1612	0.142249	6.20863	5.01565	9.83232e-08	1.61368e-05
CD14	protein_coding	1886	0.314678	11.7247	5.01301	0.000438968	0.00440061
LRRC55	protein_coding	5410	0.00607322	0.651907	4.97345	2.03497e-09	1.16095e-06
ASTL	protein_coding	1654	0.874264	20.439	4.94396	0.00159405	0.00807572
ADAMTS9	protein_coding	10680	0.104336	1.90737	4.94059	4.99987e-05	0.00117631
TIMP3	protein_coding	4603	5.22234	47.7759	4.93585	3.80535e-05	0.000977799
DSC2	protein_coding	12371	0.0409675	1.19724	4.92828	3.44153e-08	8.2143e-06
SGSH	protein_coding	6713	0.11488	1.99951	4.91426	1.2468e-06	9.29229e-05
OLFM1	protein_coding	6123	0.0301029	1.27807	4.91417	2.12732e-06	0.000132498
FLRT2	protein_coding	34899	0.0104208	0.300795	4.90098	1.77796e-06	0.000117992
S100A16	protein_coding	1701	0.00685989	2.86401	4.8935	1.03411e-07	1.65383e-05
SHROOM2	protein_coding	8191	0.00507872	0.525847	4.89207	1.57214e-09	9.85185e-07
ARHGAP29	protein_coding	15524	0.0299457	0.640016	4.88424	1.3691e-05	0.000495751
RNASE1	protein_coding	1506	0.908323	17.0185	4.88376	6.55211e-05	0.00139909
ARHGEF15	protein_coding	5294	0.0150682	0.906445	4.87935	2.90738e-08	7.43951e-06
HBZ	protein_coding	755	0	5.76041	4.8606	3.17291e-08	7.86299e-06
CXCL10	protein_coding	1176	0	8.35578	4.85809	7.38158e-07	6.5034e-05
FN1	protein_coding	17315	0.0665219	2.70734	4.8553	6.76065e-05	0.00142872
PTPRG	protein_coding	14629	0.0402027	0.799506	4.84993	1.9989e-05	0.000638691
KRTAP5-AS1	antisense	2931	0.0119434	1.6365	4.84722	8.8065e-09	3.04962e-06
SEMA6B	protein_coding	4412	0.0561838	1.48217	4.83292	1.02403e-07	1.64628e-05
PTH1R	protein_coding	2758	0.0229421	2.14044	4.82276	5.29857e-08	1.05012e-05
GFPT2	protein_coding	4780	0.00441934	1.39188	4.79078	5.39066e-07	5.30531e-05
MXRA5	protein_coding	9793	0.00722183	0.65401	4.76042	1.33744e-07	1.9744e-05
IRX3	protein_coding	2911	0.0273549	1.21264	4.74549	6.21667e-09	2.50608e-06
LAMB1	protein_coding	8140	0.0685855	2.18092	4.73911	6.38574e-05	0.001376
PCSK6	protein_coding	13237	0.03099	0.960854	4.73859	1.93244e-05	0.000625428
CARD10	protein_coding	5652	0.040615	0.953713	4.73446	9.1188e-09	3.11113e-06
SLC15A3	protein_coding	6118	0.217334	2.91503	4.71526	0.000132162	0.00215896
C11orf96	protein_coding	2373	0.376606	11.4251	4.70983	1.78113e-07	2.46358e-05
AFP	protein_coding	3259	0.0566611	3.72496	4.70076	8.38763e-05	0.00163213
LRIG3	protein_coding	5893	0.0517371	1.32021	4.68593	3.5677e-06	0.000191528
NTS	protein_coding	1555	0	2.77174	4.67977	1.26344e-07	1.89245e-05
EXOC3L2	protein_coding	2964	0.925399	7.5221	4.67075	6.10058e-05	0.00134209
HECW2	protein_coding	12692	0.0366274	1.03529	4.67053	2.55679e-05	0.000750561
FCGR3A	protein_coding	2958	0.0575809	11.7058	4.67001	0.000315097	0.00366529
HSPA12B	protein_coding	3151	0.102651	1.56412	4.66859	4.81989e-08	1.01113e-05
IL1RN	protein_coding	3256	0.397491	7.54821	4.66297	0.000208982	0.0028219
LRRC4	protein_coding	4036	0.197538	3.80164	4.6617	9.22229e-07	7.48503e-05
IL1RL1	protein_coding	5746	0.272138	4.73764	4.65648	0.00253637	0.0109461
CDC42EP1	protein_coding	2573	0.0976728	1.87864	4.63765	5.34735e-07	5.29152e-05
RND3	protein_coding	3594	0.0374179	4.84475	4.63653	2.39025e-05	0.000719558
RHOJ	protein_coding	3793	0.0130593	0.808822	4.62969	3.512e-09	1.65907e-06
ADAMTSL1	protein_coding	13652	0.00515255	0.293303	4.62757	2.65316e-08	7.08416e-06
NACAD	protein_coding	4917	0.0119783	0.525766	4.61373	6.31206e-11	1.37904e-07
NOVA2	protein_coding	8684	0.00429276	0.4178	4.61069	5.23859e-08	1.05012e-05
MDFI	protein_coding	2523	0.0353462	1.32462	4.59423	5.55467292669289e-10	4.87319e-07
PLEKHG3	protein_coding	11910	0.201146	3.50261	4.59387	2.78227368982765e-10	2.84775e-07
PEG10	protein_coding	6689	0.25787	3.41331	4.5928	1.02155e-06	8.00376e-05
BAMBI	protein_coding	2314	0.491659	9.19649	4.58922	9.78871e-05	0.0017863
WNT5B	protein_coding	4305	0.263673	11.0268	4.57219	0.00184231	0.00882113
RUNX1T1	protein_coding	13535	0.0754641	0.802778	4.56155	0.000167296	0.00247924
LINC00346	lincRNA	6265	0.126371	1.40212	4.51983	4.12813e-05	0.0010373
TRNP1	protein_coding	1976	0.00508983	2.2689	4.5112	4.14981e-07	4.40913e-05
MRVI1	protein_coding	7700	0.0956045	1.94665	4.50654	1.26367e-06	9.36264e-05
SDC3	protein_coding	7067	0.163009	11.466	4.49807	0.00419998	0.0154264
HSPA1B	protein_coding	2521	4.40321	464.109	4.49297	0.0207139	0.0499992
HMCN1	protein_coding	18579	0.032861	0.831635	4.48119	4.44634e-06	0.000223087
FBXL7	protein_coding	4854	0.0279328	1.3435	4.47064	1.71899e-05	0.000574982
GPR4	protein_coding	3145	0.0271277	1.21708	4.46876	2.09918e-07	2.79938e-05
OLR1	protein_coding	3057	0.160537	6.32835	4.46611	4.43004e-05	0.00108736
PCGF2	protein_coding	3511	0.0343942	1.48421	4.46178	1.44122e-06	0.000101501
FZD8	protein_coding	4030	0.195257	3.56813	4.46149	4.14149e-07	4.40913e-05
ALB	protein_coding	3377	0.111808	8.08214	4.45994	0.00237814	0.0104888
SLC26A11	protein_coding	4903	0.0689214	1.51556	4.44499	4.17317e-06	0.000211454
NT5E	protein_coding	4533	0.0497898	1.92554	4.43837	9.60891e-05	0.00177164
ACVRL1	protein_coding	5040	0.0481619	1.85452	4.43275	3.08364e-05	0.000850731
MASP1	protein_coding	13161	0.0111347	0.813435	4.42832	5.37575e-05	0.00123739
AHSG	protein_coding	2353	0.0108883	1.8154	4.4208	1.5954e-06	0.000109346
MEG8	lincRNA	1985	0.197341	1.93073	4.40073	1.47172e-06	0.00010294
ATP1B2	protein_coding	3276	0.615374	3.74299	4.39449	1.63559e-07	2.29892e-05
MMP14	protein_coding	4464	0.724698	7.34789	4.37733	1.26539e-06	9.36264e-05
IL1A	protein_coding	2124	0.0650107	1.6775	4.37536	5.62597e-07	5.38165e-05
SOWAHC	protein_coding	4657	0.0473743	0.749458	4.37399	1.02776e-08	3.43027e-06
CXorf36	protein_coding	6720	0.0238069	0.476778	4.35881	2.53989e-08	6.96337e-06
APOA2	protein_coding	945	0.0364237	3.12837	4.35616	1.57479e-07	2.2491e-05
TEAD2	protein_coding	2980	0.0258186	1.31008	4.3509	8.91478e-08	1.52076e-05
KALRN	protein_coding	24490	0.082532	1.75545	4.34933	0.000146996	0.00230289
ATRNL1	protein_coding	9822	0.0327499	0.943187	4.34767	0.0001234	0.00207851
STPG3	protein_coding	1611	0.0207239	2.35651	4.34237	3.124e-07	3.66129e-05
TNFRSF9	protein_coding	6331	0.0408617	1.11689	4.3313	3.75076e-06	0.00019721
TNFRSF4	protein_coding	1721	0.0816558	4.34423	4.31584	2.3379e-05	0.000711047
PCDH8	protein_coding	5150	0.0200379	1.21026	4.31481	3.19361e-06	0.000177009
ZNF703	protein_coding	3349	0.226567	6.37867	4.31475	2.22173e-05	0.000686322
AXL	protein_coding	5154	2.88959	16.2468	4.31058	0.00566658	0.0192157
ACTN2	protein_coding	5530	0.0355558	1.02485	4.30632	1.81573e-06	0.000119132
SLC6A8	protein_coding	5498	0.240575	2.33027	4.30511	4.47444e-07	4.61048e-05
GYPA	protein_coding	3512	0.2689	2.97216	4.3027	0.000529449	0.00479565
AMOTL2	protein_coding	5984	0.0954145	1.37104	4.30019	6.96291e-07	6.28833e-05
RETN	protein_coding	520	1.98396	17.5085	4.27969	0.000109533	0.00192189
ART4	protein_coding	5214	0.0439953	0.766985	4.27291	2.39623e-06	0.000144555
EML1	protein_coding	8899	0.0213565	0.567279	4.26877	6.83027e-06	0.000299615
DENND2A	protein_coding	5148	0.0267436	0.612786	4.26469	4.36579e-07	4.55902e-05
HSPA2	protein_coding	5777	0.399475	11.2305	4.26366	4.3055e-05	0.00106531
SNAI1	protein_coding	1686	1.10358	19.4932	4.2584	5.71751e-05	0.00128429
HRC	protein_coding	2685	0.0263749	1.49266	4.25761	7.39167e-07	6.5034e-05
CXCL8	protein_coding	2274	4.63562	148.225	4.25654	9.0376e-05	0.0017046
IGFBP5	protein_coding	6442	0.0334866	1.32425	4.2557	7.64816e-06	0.000322588
TSPAN18	protein_coding	5871	0.404061	4.06488	4.25141	2.35093e-05	0.00071372
FLT4	protein_coding	8852	0.15224	4.48428	4.25078	0.000109649	0.00192284
DLX2	protein_coding	2970	0.0717825	1.95482	4.25011	9.68584e-07	7.70501e-05
PCDH19	protein_coding	9756	0.017303	0.490893	4.249	9.7831e-07	7.76227e-05
LILRB5	protein_coding	6985	0.0209175	8.24055	4.24295	0.00166515	0.00827845
ADAMTS12	protein_coding	9778	0.0449078	0.843766	4.23988	0.000117261	0.00200591
PYGO1	protein_coding	8594	0.0390089	0.690637	4.23906	9.23867e-07	7.48503e-05
NID1	protein_coding	5864	1.95554	26.3474	4.22986	9.17729e-06	0.000368416
EGR4	protein_coding	2377	0.329999	4.80909	4.21431	0.00097309	0.00688949
COLEC11	protein_coding	2778	0.0610039	3.52423	4.21257	7.79332e-05	0.00155999
C2CD4B	protein_coding	1579	0.120811	2.79048	4.19858	8.83815e-07	7.25626e-05
RGL1	protein_coding	5305	0.444789	8.62804	4.19303	0.000136213	0.00219557
HEY2	protein_coding	2741	0.0179549	1.04755	4.19066	5.56657e-08	1.05511e-05
PF4	protein_coding	604	4.03771	80.0954	4.18674	0.0120778	0.0333599
ARHGAP28	protein_coding	11910	0.0127133	0.40096	4.18368	7.05841e-06	0.000305115
PPARG	protein_coding	4046	0.0262378	0.884023	4.16957	7.7935e-07	6.71843e-05
HBA2	protein_coding	856	3.92626	53.0321	4.16683	0.00783523	0.02427
STX1A	protein_coding	3693	0.193748	4.20536	4.16529	2.50698e-05	0.000740897
RASIP1	protein_coding	4149	0.163467	2.97468	4.15812	2.87807e-05	0.000816723
CTSV	protein_coding	4700	0.226516	1.11992	4.14946	9.56501e-06	0.000379952
SOX17	protein_coding	2342	0.00223711	0.952571	4.14283	2.3432e-08	6.66205e-06
AFAP1	protein_coding	10036	0.122081	0.788754	4.12669	0.000371509	0.00405872
GPX3	protein_coding	3163	0.153139	3.43249	4.11775	0.000135808	0.0021925
SEMA6D	protein_coding	8557	0.0224157	0.642961	4.11131	2.88495e-05	0.000816723
RAPH1	protein_coding	11697	0.178478	2.35434	4.10893	3.63265e-05	0.000948504
ELFN1	protein_coding	3845	0.040345	1.03907	4.10638	1.45201e-05	0.000516633
EPAS1	protein_coding	7302	0.422358	7.61448	4.10418	1.39548e-07	2.04046e-05
SNCAIP	protein_coding	7325	0.0289411	0.488848	4.10107	2.16786e-06	0.000134478
ADAMTS5	protein_coding	9056	0.0122873	0.311843	4.09675	4.49118e-06	0.000223149
LILRA6	protein_coding	4190	0.0312461	1.20772	4.0931	3.35154e-05	0.000903534
IL1R1	protein_coding	7083	0.0451576	1.14536	4.08479	8.2978e-05	0.00162082
FAM20A	protein_coding	6203	0.0394073	1.67697	4.06763	0.000159007	0.00240634
EPHA2	protein_coding	4159	0.375372	1.94695	4.06252	1.52179e-05	0.000533425
SAMD14	protein_coding	7016	0.200924	3.03597	4.05583	2.06674e-06	0.000130495
IL4I1	protein_coding	2563	0.34223	4.22678	4.05128	6.296e-06	0.000279776
GLIS2	protein_coding	4469	0.0274917	1.08696	4.05119	7.46207e-06	0.000316478
ABCC9	protein_coding	11616	0.00453692	0.229793	4.0468	3.44233e-07	3.92345e-05
IL21R	protein_coding	5467	0.151129	1.12422	4.04664	1.14623e-05	0.000437137
NR2F2-AS1	antisense	6063	0.0292573	0.502875	4.04574	4.87617e-06	0.000234181
TMEM132A	protein_coding	7271	0.0237653	0.373373	4.04511	3.01278e-07	3.59963e-05
MMP9	protein_coding	2336	0.055178	2.13808	4.03334	1.81834e-05	0.00059398
LAMA2	protein_coding	10094	0.0175849	0.567941	4.0321	1.63722e-05	0.000561266
WNK2	protein_coding	13198	0.0182727	0.525175	4.03014	2.38031e-05	0.000719389
TMEM37	protein_coding	2292	0.0101821	1.94275	4.02445	5.89342e-06	0.000268094
HABP2	protein_coding	3657	0.00131753	0.550172	4.02423	5.36569e-08	1.05095e-05
DCN	protein_coding	12847	0.029904	0.945718	4.02356	0.000650273	0.00536248
PCDHAC2	protein_coding	6318	0	0.383454	4.02008	2.60396e-07	3.29042e-05
SEPT10	protein_coding	4131	0.0267224	0.940564	4.01678	1.98616e-05	0.000636074
CSF1R	protein_coding	5151	9.5093	48.6053	4.01343	0.0101571	0.0293483
C3AR1	protein_coding	2145	0.423684	5.02392	4.01288	3.27296e-06	0.000178983
C6orf223	protein_coding	3917	0.00472075	0.486402	4.01143	4.9666e-08	1.01113e-05
SAMD5	protein_coding	6320	0.00165801	0.340254	4.01057	1.10756e-07	1.7378e-05
WNT11	protein_coding	2401	0.193997	2.6454	4.01018	5.76808e-06	0.000265938
DUSP5	protein_coding	2615	1.75556	21.5253	4.00731	4.76691e-07	4.84283e-05
ACHE	protein_coding	3730	0.307427	3.66486	4.00451	3.57407e-06	0.000191528
EDIL3	protein_coding	5738	0	0.246146	3.9954	2.5282e-09	1.27264e-06
FAT1	protein_coding	16177	0.0337147	0.708648	3.99203	8.93277e-05	0.00169106
MYO7A	protein_coding	10145	0.122029	2.47239	3.98754	0.000385584	0.00413689
SERPINA1	protein_coding	4902	0.314707	3.0452	3.98547	0.00104088	0.00715683
ECSCR	protein_coding	740	0.0354008	3.57742	3.98531	2.72755e-07	3.35009e-05
TRPM4	protein_coding	6604	0.180685	1.86107	3.98499	1.70391e-05	0.000572433
CHAC1	protein_coding	2058	0.126439	2.72452	3.98301	4.15186e-05	0.00104104
TM4SF18	protein_coding	4482	0.00952706	0.483008	3.98238	7.833e-07	6.71843e-05
NRIP3	protein_coding	4123	0.403682	5.05413	3.98069	3.37119e-07	3.87699e-05
PLEKHG5	protein_coding	7053	0.118845	2.69913	3.97875	0.000125947	0.0021024
PPBP	protein_coding	715	1.97339	42.8612	3.97404	0.0103374	0.0297296
VCAM1	protein_coding	6049	0.256107	4.61219	3.96976	0.00459755	0.0164805
ICAM1	protein_coding	3706	2.08699	50.6161	3.96323	0.00185754	0.00886389
PDE2A	protein_coding	7182	0.189085	2.39993	3.96184	4.02358e-07	4.3485e-05
LIF	protein_coding	3969	0.30991	2.18383	3.95741	4.58967e-05	0.00111144
NGFR	protein_coding	4150	3.20755	3.10397	3.95673	0.00149238	0.00778837
GNG12	protein_coding	4724	0.0251821	0.855227	3.95388	3.49351e-05	0.000924303
KCNH4	protein_coding	3924	0.0820516	2.26033	3.95082	6.35843e-05	0.00137398
CREB5	protein_coding	11674	0.158861	2.3524	3.94799	8.57158e-07	7.11349e-05
REEP1	protein_coding	5380	0.0194659	0.465423	3.94567	1.5859e-06	0.000109185
BCAR1	protein_coding	9178	0.168391	0.85597	3.94384	9.17423e-05	0.00172191
COL6A2	protein_coding	5386	0.799025	8.61267	3.94331	0.000154809	0.00236843
COL25A1	protein_coding	6653	0.0289262	0.724494	3.9408	4.2943e-05	0.00106416
GPRC5A	protein_coding	8440	0.0172611	0.295734	3.93757	3.05441e-06	0.000171147
CCDC68	protein_coding	5180	0.0636203	1.13313	3.93722	0.000234974	0.00304874
SPRY4	protein_coding	5930	0.212061	2.20318	3.93434	2.83594e-07	3.42837e-05
LAMA4	protein_coding	11575	0.0356726	0.615826	3.93396	2.43378e-05	0.000729089
PLVAP	protein_coding	2305	3.83243	39.4791	3.9312	1.79534e-05	0.000588343
PTN	protein_coding	1713	0	2.12578	3.92979	3.59475e-06	0.0001923
RP11-109G23.3	antisense	2320	0.198529	2.13063	3.92243	6.74338e-08	1.24736e-05
FOXC2	protein_coding	2478	0.0858454	1.76563	3.92159	1.61829e-05	0.000556453
FABP3	protein_coding	1026	0.0433595	4.5274	3.9201	1.18344e-05	0.000446972
TGM2	protein_coding	8036	1.39216	5.33042	3.91928	0.000128105	0.00212153
CCL2	protein_coding	1986	0.0168249	1.44423	3.91788	2.60644e-06	0.000152154
SLC7A7	protein_coding	5131	0.287639	2.77412	3.89684	0.00122376	0.00715683
SIGLEC1	protein_coding	7886	0.237545	5.59005	3.88814	0.0129694	0.0351584
YAP1	protein_coding	6296	0.0112422	0.480385	3.88717	4.62509e-06	0.00022642
FABP1	protein_coding	2470	0.00780274	0.76174	3.87892	2.98659e-07	3.58227e-05
CD5L	protein_coding	2456	0.127924	17.5856	3.8741	0.00377572	0.0143363
CCM2L	protein_coding	2587	0.0486095	1.05642	3.86044	3.67359e-06	0.000194753
PARVA	protein_coding	8294	0.0215198	0.369216	3.85513	8.12354e-06	0.000337083
FBLN1	protein_coding	7285	0.631094	5.19768	3.85154	1.12019207487963e-10	1.63878e-07
STOX2	protein_coding	11316	0.0672376	0.665521	3.84879	0.000184854	0.00262662
DSCAM	protein_coding	8577	0.0431428	0.782393	3.84618	0.000174447	0.00252866
TDRD10	protein_coding	2706	0	0.583771	3.84089	3.12145e-08	7.86299e-06
LUCAT1	lincRNA	2904	0.177229	3.24808	3.84069	0.00108938	0.00715683
CCDC85A	protein_coding	3982	0	0.455268	3.84033	3.69632e-07	4.09744e-05
MSR1	protein_coding	7812	0.0475004	2.0277	3.82924	0.00156175	0.00797525
FAM178B	protein_coding	3545	5.14102	23.2722	3.82379	0.0290306	0.0648578
DOK2	protein_coding	2211	0.952242	12.2866	3.82369	6.27027e-06	0.000279036
RHOB	protein_coding	2372	5.0668	88.5203	3.82084	5.6966e-06	0.000263434
SOX9	protein_coding	3935	0.00367334	0.604607	3.81922	7.05279e-07	6.35082e-05
EGFR	protein_coding	12521	0.0320705	0.310962	3.81781	7.76237e-05	0.00155747
KCNH7	protein_coding	4974	0.0169123	0.517112	3.81392	2.181e-06	0.000135019
SOX8	protein_coding	4432	0.00930494	0.743157	3.81384	4.48327e-06	0.000223117
FOXL1	protein_coding	3742	0.0119291	0.496722	3.81236	5.40773e-08	1.05095e-05
PDE10A	protein_coding	12348	0.0286216	0.467275	3.8048	0.000192072	0.00267836
CYR61	protein_coding	2455	0.464511	4.22454	3.79918	1.50597e-05	0.00053091
FNDC5	protein_coding	3139	0.0215548	0.752222	3.79578	1.42893e-06	0.000100866
NFATC4	protein_coding	8437	0.0735749	0.783001	3.79565	1.1389e-05	0.000434965
ST6GALNAC5	protein_coding	4263	0.00482184	0.343333	3.78558	8.1898e-09	3.04962e-06
CD300E	protein_coding	3752	0.0802926	1.45395	3.77026	0.000128156	0.00212153
COL6A3	protein_coding	19633	0.0653078	1.53046	3.76926	0.00100763	0.00703666
HSPE1	protein_coding	1977	1.99262	45.7948	3.76566	3.67291e-05	0.00095522
HAPLN1	protein_coding	6956	0.00352588	0.344575	3.76307	3.32624e-06	0.000181091
FBXO17	protein_coding	4960	0.00212948	0.318886	3.76037	6.1897e-07	5.74202e-05
STRA6	protein_coding	7690	0.00834107	0.330361	3.7452	9.59589e-07	7.65329e-05
HTRA1	protein_coding	2120	0.0190022	1.01916	3.73887	2.08241e-06	0.000130495
FZD4	protein_coding	7383	0.319127	1.84551	3.73733	0.000471323	0.00451989
OSBPL6	protein_coding	11486	0.061502	0.552812	3.73224	6.74002e-05	0.00142712
SLC7A2	protein_coding	7905	0.0258035	0.459889	3.72625	2.08185e-05	0.000658344
DNAAF1	protein_coding	7783	0.0459754	0.383557	3.72223	4.62319e-05	0.00111604
EPHA7	protein_coding	7456	0.0756512	0.321233	3.72162	0.000235103	0.00304874
CHD7	protein_coding	16982	1.41986	15.5538	3.71864	6.18711784256342e-10	5.20575e-07
SOX18	protein_coding	1864	0.381177	4.32149	3.71393	0.000380952	0.00410529
NR1H4	protein_coding	3460	0.0119729	1.15817	3.71333	1.35002e-05	0.000490609
EFNB2	protein_coding	4461	0.626476	5.77518	3.71114	3.50108e-06	0.000188935
ADGRL4	protein_coding	3677	0.0212354	1.01268	3.70647	2.67182e-05	0.000773971
ID4	protein_coding	2344	0.0401364	1.31149	3.70485	1.42509e-05	0.000509416
PDZD4	protein_coding	4341	0.00332978	0.438194	3.70049	1.35731e-06	9.80649e-05
CXCL14	protein_coding	1975	0.0118164	1.72524	3.68915	3.1372e-05	0.000860866
FOXJ1	protein_coding	2641	1.13947	6.0326	3.67799	0.000795365	0.00606318
BAG3	protein_coding	2747	2.97339	135	3.67144	0.0167803	0.0426615
RASSF10	protein_coding	2530	0.0322365	0.618669	3.66975	2.53928e-07	3.23532e-05
BRINP1	protein_coding	3905	0.0331843	0.574074	3.66815	6.0897e-06	0.000274582
COL11A1	protein_coding	8512	0.0109955	0.28889	3.66612	7.09981e-06	0.000305499
FOLR2	protein_coding	1416	0.19685	10.3851	3.66496	0.00196138	0.00919196
CDH11	protein_coding	13381	0.00879945	0.286724	3.65935	5.08552e-05	0.0011857
PLXNB3	protein_coding	7007	0.0509966	0.682487	3.65885	1.32866e-05	0.000486548
RARB	protein_coding	3697	0.0312176	0.915273	3.65647	3.61257e-05	0.000946482
ONECUT2	protein_coding	16234	0.0182937	0.17927	3.65371	5.674e-07	5.41074e-05
SHROOM3	protein_coding	13159	0.0205991	0.311221	3.65323	9.21894e-05	0.00172608
CCBE1	protein_coding	6577	0.0167786	0.735618	3.65064	9.35661e-05	0.00173913
CAV1	protein_coding	4082	0.14505	2.31448	3.64751	0.000582542	0.00501561
PTGIS	protein_coding	5579	0.00706212	0.386867	3.64063	2.47099e-06	0.000147615
SELE	protein_coding	4585	0.0145337	1.89882	3.64061	0.000237938	0.00306922
AGR2	protein_coding	2845	0.00781402	0.887694	3.63933	7.09393e-06	0.000305499
RAPGEF4	protein_coding	7129	0.0836433	0.980881	3.63747	0.00028854	0.00347176
WWTR1	protein_coding	8413	0.116443	1.30028	3.62617	0.000668415	0.00545692
KCNN3	protein_coding	13598	0.0237855	0.35447	3.62551	2.71083e-05	0.00078277
FRAS1	protein_coding	18960	0.0453227	0.346719	3.62154	5.40057e-05	0.00123846
DAAM2	protein_coding	12955	0.0104613	0.291085	3.621	0.00011591	0.00199329
PKHD1L1	protein_coding	13728	0.041466	0.98897	3.62069	0.00146582	0.00774049
CHSY3	protein_coding	3938	0.0823873	1.1377	3.61573	1.81573e-05	0.00059398
WLS	protein_coding	4469	0.0688068	0.682094	3.61535	6.46806e-05	0.00138693
RGL3	protein_coding	4356	0.0243374	1.50573	3.61435	4.97038e-05	0.00117459
ITGB5	protein_coding	6447	0.206802	3.19776	3.61255	0.00302217	0.0123011
CLEC1B	protein_coding	3670	0.340991	8.71527	3.60862	0.0246595	0.0571125
PRICKLE2	protein_coding	14747	0.0891882	0.663944	3.60858	0.00058569	0.00502707
NES	protein_coding	5558	0.0949986	2.04958	3.60115	0.000625641	0.0052428
SMPDL3A	protein_coding	2349	0.0893776	2.32847	3.59846	0.000231458	0.00301789
CETP	protein_coding	2085	0.275643	9.71404	3.59697	0.00317827	0.0127338
ADAMTS2	protein_coding	8726	0.0582356	1.4946	3.59681	0.00375286	0.0142759
G0S2	protein_coding	866	1.84428	12.953	3.59623	0.000593855	0.00505977
SLC4A1	protein_coding	5287	1.82823	22.9081	3.58705	0.0336254	0.0726903
HES1	protein_coding	2062	2.29425	11.858	3.58599	2.05318e-05	0.000650617
OSMR	protein_coding	7174	0.0215347	0.379039	3.58069	1.55862e-05	0.000542619
APOB	protein_coding	14828	0.0133322	0.45821	3.58058	0.00089908	0.00657343
DNALI1	protein_coding	4456	0.0662222	0.771006	3.57945	2.06054e-05	0.000652277
ABCB11	protein_coding	5151	0.131785	1.18293	3.5791	0.00113902	0.00715683
SDC2	protein_coding	4536	0.0152773	0.36843	3.57875	2.86991e-06	0.00016289
MYOF	protein_coding	8473	1.00301	2.0649	3.57716	0.00141847	0.00759864
DYSF	protein_coding	8386	0.434552	5.21734	3.56807	0.000381414	0.00410529
MSC	protein_coding	2113	0.093736	2.24135	3.56768	0.000265444	0.00329322
GPRC5B	protein_coding	6667	0.0952424	0.737798	3.56395	5.47255e-05	0.00124978
SMAD9	protein_coding	5723	0.0472497	0.757647	3.56106	4.40711e-05	0.0010826
PDGFRB	protein_coding	7137	0.319762	1.98166	3.56068	0.000803062	0.00610065
NRG1	protein_coding	11328	0.0260052	0.333699	3.55977	0.000250821	0.0031788
RP11-739B23.1	antisense	3660	0.0173522	0.535806	3.55621	8.07574e-07	6.83123e-05
VSIG4	protein_coding	2192	0.124708	6.49878	3.55568	0.00380161	0.0143847
FAM71A	protein_coding	2305	0.0588406	1.06251	3.55497	1.30964e-05	0.000482758
CC2D2A	protein_coding	7606	0.0876852	0.807027	3.55408	0.000120064	0.00203909
ZFPM2	protein_coding	7775	0.231006	2.90679	3.55246	3.03835e-05	0.000842018
COLEC12	protein_coding	7340	0.0546405	1.1904	3.55202	0.00334301	0.013184
NPHS1	protein_coding	5459	0.0181004	1.34465	3.54962	0.000291131	0.00348389
CRYAB	protein_coding	3034	0.0248586	0.86077	3.54866	1.08205e-05	0.000418457
POSTN	protein_coding	5464	0.0275946	1.47826	3.54723	0.000617219	0.00520239
GAS1	protein_coding	2827	0.350786	3.49153	3.54656	2.55324e-06	0.000149904
GNA14	protein_coding	2721	0.18097	1.45771	3.5422	0.000214901	0.00287736
FILIP1L	protein_coding	5903	0.271786	2.26647	3.54001	2.59497e-08	7.05143e-06
TSHZ2	protein_coding	12581	0.00637946	0.322399	3.53954	4.47851e-05	0.00109488
NUPR1	protein_coding	5674	0.0479733	0.311581	3.5304	2.45114e-05	0.000732671
SIGLEC11	protein_coding	3173	0.00277347	1.18989	3.52526	2.21428e-05	0.000685399
HCAR2	protein_coding	2051	0.389512	5.15305	3.52411	0.000252499	0.00319194
FCGBP	protein_coding	12870	0.0476699	0.753483	3.52344	0.00105582	0.00715683
CD68	protein_coding	2189	0.044843	1.17124	3.52263	1.23346e-05	0.000462448
COL13A1	protein_coding	5761	0.00461096	0.479734	3.5213	8.83191e-06	0.00035872
EBI3	protein_coding	1284	0.0635402	2.42314	3.51836	6.63874e-05	0.00140877
COLEC10	protein_coding	1670	0.0902278	3.776	3.51538	0.000247176	0.0031506
RP11-713P17.4	lincRNA	1130	0.764277	5.7857	3.51409	0.00186876	0.00889094
HS3ST3A1	protein_coding	2628	0.042956	0.707163	3.51249	2.56654e-06	0.000150123
RP11-334C17.5	antisense	5122	0.018577	0.514953	3.51031	3.26366e-05	0.000885829
ALOX12	protein_coding	2616	2.00503	11.9829	3.50888	5.66729e-05	0.00127863
CHST3	protein_coding	6970	0.0551616	0.385225	3.50722	4.75466e-05	0.00113873
WSCD1	protein_coding	9082	0.0637009	0.833637	3.50587	0.00113268	0.00715683
TSKU	protein_coding	4131	0.0609215	0.640082	3.50529	1.65959e-05	0.000564961
JPH1	protein_coding	4378	0.0950204	1.11034	3.50484	6.23553e-05	0.00135697
ROR2	protein_coding	5818	0.0365604	0.358768	3.50481	2.90618e-06	0.000164644
NECTIN3	protein_coding	6184	0.0256637	0.435791	3.50442	3.80301e-05	0.000977799
RP11-670E13.6	lincRNA	348	0.279691	4.15644	3.50153	7.26668e-07	6.46755e-05
DUSP2	protein_coding	1932	4.38389	55.9372	3.49836	5.43405e-06	0.000252815
ERRFI1	protein_coding	4186	0.0468443	0.949173	3.49763	1.32757e-05	0.000486548
GPX8	protein_coding	3868	0.00627146	0.401667	3.49709	3.76043e-07	4.15352e-05
PLIN5	protein_coding	4815	0.0855124	0.957884	3.49383	0.000259444	0.00325365
DENND2C	protein_coding	7413	0.157228	0.654536	3.49325	0.000290254	0.00347738
LINC00472	lincRNA	3443	0.0264701	0.498561	3.49275	2.85496e-06	0.000162539
PABPC4L	protein_coding	4944	0.207001	1.40757	3.49116	1.60989e-05	0.000554186
ALPL	protein_coding	3007	0.00615177	0.936368	3.49009	1.32461e-05	0.000486548
TMEM151B	protein_coding	5459	0.00483296	0.30421	3.48647	1.01389e-06	7.98273e-05
FAM171A1	protein_coding	3955	1.90046	7.15435	3.48644	0.00611242	0.0203483
CNR1	protein_coding	6357	0.00940387	0.170736	3.47275	1.87751e-06	0.000122401
CXCL2	protein_coding	1500	4.23129	45.2042	3.46369	4.39229e-08	9.64572e-06
FGA	protein_coding	3956	0.00266993	0.539212	3.46082	4.96548e-06	0.000237493
LGMN	protein_coding	3899	4.39408	29.1876	3.45709	0.000766035	0.00592789
PPP1R13B	protein_coding	9031	0.216356	2.3313	3.44342	1.70545e-09	1.04735e-06
FGD1	protein_coding	4275	0.0931501	0.967216	3.44317	1.66424e-05	0.000565916
TSPAN9	protein_coding	6905	0.304261	1.86698	3.44203	0.000753652	0.00586161
CLEC3B	protein_coding	1105	0.421233	3.89522	3.44158	4.63694e-05	0.00111833
RP11-90C4.1	lincRNA	4913	0.00524638	0.302859	3.44099	1.31941e-06	9.60039e-05
C7	protein_coding	5223	0.020383	0.593677	3.43628	0.000111584	0.00194459
COL6A1	protein_coding	5343	0.246928	3.57256	3.43369	0.00030275	0.00356587
RP11-287D1.2	lincRNA	1863	0.18615	1.52525	3.42848	2.52673e-05	0.000743614
RP11-161M6.2	lincRNA	3905	0.0823914	1.05042	3.42799	7.86941e-05	0.00157214
LAMA1	protein_coding	15872	0.0131447	0.187465	3.42554	2.81911e-05	0.000803747
TDRP	protein_coding	3613	0.00479941	0.424604	3.42225	1.97533e-06	0.000126627
MARCKS	protein_coding	4268	4.20702	56.2025	3.4195	1.67123e-05	0.000567246
RFTN2	protein_coding	6007	0.0271165	0.348856	3.419	8.8578e-06	0.000359297
GRHL1	protein_coding	7952	0.156044	0.75645	3.41629	1.96334e-06	0.000126627
CSF3	protein_coding	2220	0	0.799381	3.41394	9.45665e-06	0.000378094
GABRE	protein_coding	9612	0.402139	2.49689	3.40914	5.00525e-08	1.01113e-05
HOMER1	protein_coding	6154	0.319277	2.43088	3.4034	1.41045e-07	2.04722e-05
TMEM132E	protein_coding	4853	0.0104575	1.80123	3.4033	0.000498318	0.0046424
CADPS	protein_coding	14638	0.00894947	0.172324	3.4032	8.5502e-06	0.000350524
CYP26B1	protein_coding	5015	0.0207813	0.410961	3.40091	3.67703e-05	0.00095522
ECM1	protein_coding	3360	0.608677	7.48085	3.39782	0.00010496	0.00187485
RP11-72I8.1	antisense	2598	0.123228	1.28479	3.39486	3.897e-05	0.000995518
SPAAR	protein_coding	2357	0.00204421	0.506087	3.38745	3.81609e-07	4.19989e-05
LINC01136	lincRNA	2725	0.0957269	1.2029	3.38715	0.000173406	0.00252231
RP11-713P17.3	lincRNA	4032	0.100113	14.1072	3.38193	0.0364742	0.0772238
TMEM56	protein_coding	7402	0.469591	1.21574	3.37973	0.00758233	0.023755
RGMB	protein_coding	6671	0.0276561	0.546116	3.37754	3.25272e-05	0.000883875
SLC4A10	protein_coding	7550	0.0101229	0.212843	3.37649	7.99249e-06	0.000333447
OLIG1	protein_coding	2277	0.0589923	1.80284	3.37507	0.000535359	0.00481792
RP11-727F15.9	antisense	765	0.659862	5.37913	3.37186	0.000208304	0.00281499
BHLHE41	protein_coding	3948	0.02853	0.392634	3.37065	7.49624e-06	0.00031708
BCL6B	protein_coding	4373	0.790959	5.75342	3.37055	5.81032e-09	2.42441e-06
RP11-43F13.4	lincRNA	1585	0.0567024	1.76983	3.36693	6.26711e-05	0.00136191
GPER1	protein_coding	3149	0.0347012	1.15497	3.362	0.000280313	0.00340478
DKK3	protein_coding	5059	0.0072495	0.299267	3.35949	2.77414e-06	0.000158923
CCL3L1	protein_coding	1469	0.0177948	1.02304	3.35937	1.02178e-06	8.00376e-05
PRPH	protein_coding	4353	0.00231492	0.286219	3.35599	1.71774e-06	0.000115668
TACC2	protein_coding	18844	0.0181789	0.257319	3.35348	0.00061408	0.00518448
SNAI2	protein_coding	2204	0.0571759	0.996588	3.35174	2.38736e-05	0.000719558
TUBB2A	protein_coding	1727	0.459834	2.32123	3.34903	7.28928e-07	6.46892e-05
BVES	protein_coding	5808	0.0365133	0.572643	3.34769	0.000538256	0.00483646
FAM110B	protein_coding	4943	0.0794572	0.837488	3.34329	0.000152819	0.00235212
CCND1	protein_coding	4830	1.43769	5.08481	3.34281	4.83376e-05	0.00115059
FLNC	protein_coding	9280	0.198416	1.58931	3.34186	0.0001388	0.00222094
AL117190.3	protein_coding	1382	0	0.948603	3.3328	4.74164e-07	4.84283e-05
TMEM47	protein_coding	4054	0	0.222261	3.33234	1.20686e-07	1.82551e-05
CLEC10A	protein_coding	2469	0.801273	5.08071	3.33076	0.0143777	0.0378857
FOXC1	protein_coding	3926	0.208463	1.06645	3.32334	0.000651632	0.00536722
HRH1	protein_coding	5546	0.0203544	1.06982	3.32114	0.000935938	0.00673832
AHSP	protein_coding	562	7.2901	22.7529	3.32101	0.00521466	0.018142
CRISP3	protein_coding	2247	0.0882893	1.58347	3.31918	0.000599675	0.00509226
TBC1D9	protein_coding	5603	1.12042	3.92639	3.31779	0.000896205	0.00656462
PTPRZ1	protein_coding	9917	0.0158456	0.415288	3.31619	0.000571646	0.00497338
AXIN2	protein_coding	5226	0.0580139	0.455398	3.31607	6.96096e-06	0.000302752
NTRK2	protein_coding	20363	0.00760318	0.175352	3.31575	5.73265e-05	0.00128675
CCDC80	protein_coding	13071	0.0575656	0.728982	3.31571	0.00256241	0.0110167
ITGB3	protein_coding	4394	1.44925	10.3618	3.31488	0.0420025	0.0862348
PCSK9	protein_coding	4981	0.00739021	0.175893	3.31322	2.72248e-07	3.35009e-05
PLEKHH3	protein_coding	4803	0.262665	2.32991	3.30674	2.92254e-05	0.000821037
BCAS1	protein_coding	8186	0.0126851	0.247413	3.30655	3.47329e-05	0.000922586
DPCR1	protein_coding	5682	0.0243819	0.37267	3.30369	0.000132643	0.00216186
HECW1	protein_coding	13965	0.0117908	0.264683	3.30313	6.80292e-06	0.000298842
NXF3	protein_coding	3526	0.158092	1.56592	3.30192	0.000380733	0.00410529
C1orf61	protein_coding	12314	0.0474503	0.358037	3.29685	0.000834108	0.00624499
GABRA2	protein_coding	11930	0.00133045	0.122509	3.29597	6.87341e-06	0.00030022
RP11-359E3.4	antisense	6545	0.00341015	0.227266	3.2955	1.062e-05	0.000412262
MEG9	lincRNA	2641	0.0190133	0.312678	3.29408	1.86907e-07	2.56212e-05
FHAD1	protein_coding	12805	0.0180552	0.232551	3.29056	0.000110243	0.00192885
C14orf132	protein_coding	7775	0.031969	0.320808	3.28555	0.000137887	0.00221095
TRIM10	protein_coding	3546	0.0772994	2.2624	3.28048	0.00286261	0.0119286
SALL1	protein_coding	5660	0.030567	0.377453	3.27486	2.92084e-05	0.000821037
MUC4	protein_coding	21325	0.045761	0.399132	3.27456	0.00177927	0.00864739
HEATR9	protein_coding	2930	0.0160179	0.909026	3.27405	6.55858e-05	0.00139945
PROX1	protein_coding	8928	0.0301312	0.210007	3.26954	0.000111082	0.00194131
CTSE	protein_coding	2671	0.092017	1.38212	3.26869	0.000633374	0.00528667
KREMEN2	protein_coding	2614	0.0630781	0.949295	3.26866	3.96899e-05	0.00100887
BMP2	protein_coding	3601	0.250312	3.3124	3.26657	0.00011201	0.00194779
TOX2	protein_coding	3223	0.138055	1.06823	3.26619	0.000511773	0.00470494
MRC1	protein_coding	5171	0.00225656	0.324109	3.26568	5.2722e-06	0.000247648
MARC2	protein_coding	2597	0.160914	0.95526	3.26563	1.45744e-06	0.000102174
CFAP221	protein_coding	9655	0.0116402	0.19677	3.2622	1.37119e-05	0.00049592
MYF5	protein_coding	1542	0	0.998583	3.2614	0.00021927	0.0029079
SPIC	protein_coding	1132	0	3.4471	3.25976	7.27847e-05	0.00149995
RP11-540A21.2	lincRNA	2632	0.0779659	1.16311	3.25915	6.78079e-05	0.00143004
ADAMTS7	protein_coding	7730	0.0712381	0.692044	3.25529	0.000145814	0.00229576
GJA5	protein_coding	3267	0.0147687	0.560482	3.25509	1.6876e-05	0.000568978
RAB3IL1	protein_coding	3006	0.495354	9.01229	3.2527	0.00312522	0.0126002
TGFBR3	protein_coding	8705	0.178879	2.2693	3.25096	0.00064237	0.00531922
AC116609.2	lincRNA	535	0	3.65994	3.24981	4.55288e-05	0.00110435
DNAJB1	protein_coding	3672	23.9056	867.505	3.24811	0.0494123	0.0977423
CAMSAP2	protein_coding	7777	0.130002	1.2021	3.24495	5.4788e-05	0.00124987
NINL	protein_coding	6008	0.151834	1.12577	3.24199	3.08212e-05	0.000850731
FBLIM1	protein_coding	4716	0.0101329	0.348847	3.24073	1.40779e-05	0.000504996
NYAP1	protein_coding	3586	0.0825276	0.7113	3.24039	0.00012545	0.00209807
HHIPL1	protein_coding	7836	0.0162901	0.240647	3.23894	5.49673e-05	0.00125303
DZIP1	protein_coding	8470	0.0915064	0.587944	3.23853	4.04551e-05	0.0010224
TNC	protein_coding	9636	0.00807888	0.22576	3.23777	8.81888e-05	0.00167986
DSEL	protein_coding	9531	0.170472	1.63602	3.23628	1.36179e-06	9.81574e-05
EPHB3	protein_coding	4532	0.138333	1.16008	3.2361	0.000954478	0.00682221
GGT5	protein_coding	6054	0.17239	0.746376	3.23354	0.0014669	0.00774049
NXN	protein_coding	5880	0.203307	1.34833	3.23208	0.000961491	0.00685637
GEM	protein_coding	2648	0.241412	2.22841	3.23207	0.00257114	0.011045
NAV3	protein_coding	12135	0.0428521	0.353114	3.22866	0.000209464	0.00282469
RPGRIP1	protein_coding	5470	0.043318	0.586072	3.22743	0.000324028	0.00372505
RP11-736K20.5	antisense	1218	0.0976381	1.51928	3.2254	0.000124815	0.00209193
CNTN4	protein_coding	9120	0.0265061	0.297203	3.22394	0.000264985	0.00328886
DIO3	protein_coding	2102	0.0506253	0.843669	3.22326	7.48008e-05	0.00152512
TRIM36	protein_coding	6113	0.213668	0.793355	3.22126	0.000821256	0.00618682
ADAMTS15	protein_coding	5673	0.0168146	0.288302	3.21942	4.80089e-05	0.00114381
PCDH1	protein_coding	5903	0.0377145	0.33027	3.21909	7.67242e-05	0.00154789
CTTN	protein_coding	6949	1.49481	4.22354	3.21597	0.010115	0.0292681
TNFRSF18	protein_coding	1370	0.362728	2.54532	3.21467	0.00239364	0.0105248
CD1D	protein_coding	2253	0.716703	2.6075	3.21403	0.00172109	0.00845159
VWA3B	protein_coding	8307	0.00211539	0.234812	3.21236	8.3534e-06	0.000343833
FAM46B	protein_coding	2368	0.0966041	0.790875	3.21209	0.000115527	0.00199179
RASSF9	protein_coding	5682	0.0445761	0.36519	3.21067	0.000412787	0.00427632
TINAGL1	protein_coding	5281	0.675372	3.17414	3.20939	2.78784e-05	0.000797796
LGALSL	protein_coding	4003	0.21188	2.79734	3.20907	0.00468495	0.0167216
TNN	protein_coding	5008	0.0637902	0.54477	3.20461	0.000182295	0.00260403
MYRF	protein_coding	10680	0.0252187	0.309129	3.20432	0.000141788	0.00224999
HBEGF	protein_coding	3018	1.62757	10.6424	3.20292	6.50474e-05	0.00139285
ADGRA2	protein_coding	7061	0.734646	3.7219	3.20153	1.78955e-06	0.000118172
RP11-61J19.4	lincRNA	1899	0.0386615	0.819392	3.20091	2.32906e-05	0.000710745
CACNA2D3	protein_coding	4670	0.344986	1.19284	3.19984	0.000475938	0.00453028
ID3	protein_coding	1797	1.66532	11.0607	3.19903	0.000160417	0.00241695
AF213884.2	antisense	479	0.428979	3.8032	3.1988	7.75931e-05	0.00155747
CACNA2D1	protein_coding	9010	0.0200641	0.217834	3.1945	7.01025e-05	0.00146334
PLA2G16	protein_coding	3116	0.0991283	0.941492	3.19416	0.000661338	0.0054181
CRISPLD2	protein_coding	7965	0.0867121	1.48698	3.18453	0.000700252	0.0056053
HHIP	protein_coding	12074	0.227576	1.7561	3.18241	0.000221708	0.0029243
CTNNA3	protein_coding	11136	0.0277967	0.261729	3.17978	0.000154085	0.00236107
CXCL9	protein_coding	2740	0.0060171	1.71455	3.17795	0.000274982	0.00336398
COL23A1	protein_coding	3586	1.77972	12.8944	3.17756	3.52825e-05	0.000930266
PTPRH	protein_coding	4344	0.030062	0.373141	3.17359	7.84186e-05	0.00156868
PRG3	protein_coding	869	0.520972	5.60387	3.1723	0.00282438	0.0118187
FRMD4A	protein_coding	13328	0.383756	4.3872	3.17202	0.000189601	0.00266862
NEFM	protein_coding	4381	0.101445	1.55078	3.17094	0.00123833	0.00715683
DSP	protein_coding	10093	0.0313895	0.378337	3.16963	0.000513978	0.00471251
HCAR3	protein_coding	2137	0.540628	6.92789	3.16709	0.00053043	0.00480171
GFRA2	protein_coding	5716	0.0867396	3.30979	3.16408	0.00759478	0.0237819
CDH15	protein_coding	4628	0.0126561	0.382285	3.16379	6.17019e-05	0.00134848
RP11-733O18.1	lincRNA	976	0	4.08935	3.16378	9.15618e-05	0.00172062
AC084082.3	lincRNA	1189	0.0202615	1.0932	3.16372	9.50014e-06	0.000378846
ASXL3	protein_coding	12584	0.040568	0.256354	3.16019	0.000479757	0.00454814
SEC14L5	protein_coding	6477	0.0252274	0.598203	3.15856	0.00104495	0.00715683
KIF26A	protein_coding	6756	0.152242	1.25731	3.15682	0.00046806	0.00450823
SCNN1B	protein_coding	3918	0	0.241018	3.15564	0.000118054	0.0020161
IER5L	protein_coding	2711	2.01908	17.0111	3.15533	0.000501465	0.00465618
MATN3	protein_coding	3118	0.00168035	0.503767	3.15061	1.27965e-05	0.000475062
CYP3A43	protein_coding	2637	0.00548145	0.98602	3.14785	0.000293679	0.0034944
ADAP2	protein_coding	3750	0.39758	7.75699	3.14594	0.00580291	0.0195506
RGS7BP	protein_coding	4379	0.0197881	0.323732	3.14501	1.63777e-05	0.000561266
MS4A6A	protein_coding	5791	1.46317	5.53458	3.14185	0.00284132	0.0118717
NEUROG2	protein_coding	2287	0.0128332	0.831177	3.14165	4.51573e-05	0.00110135
CTNND2	protein_coding	6863	0.0406473	0.507446	3.14049	0.000364352	0.00402006
OLFM2	protein_coding	2500	0.0257696	0.694086	3.14007	5.01271e-05	0.00117648
FGB	protein_coding	2708	0.0211802	0.765113	3.13563	0.000259335	0.00325365
OLFML3	protein_coding	2821	0.137795	2.57777	3.13558	0.00399178	0.0148782
ADAM12	protein_coding	9860	0.17511	0.418765	3.132	0.000388464	0.00414461
RP11-495L19.1	lincRNA	4805	0.0218513	0.49819	3.13169	0.00014739	0.00230311
IL11	protein_coding	2671	0.0832038	2.19604	3.13103	0.00386098	0.014537
COL4A6	protein_coding	9282	0.0510923	0.38632	3.12877	0.00102218	0.00709481
MARCO	protein_coding	2079	0.179749	16.5957	3.12773	0.0147931	0.0387243
UPB1	protein_coding	6793	0.0394977	0.493763	3.12506	0.000768772	0.00594308
TUSC3	protein_coding	5190	0.0770406	0.706054	3.11875	0.000459404	0.00447486
S100P	protein_coding	1280	0.145964	2.40811	3.1185	0.000353339	0.00394532
ESAM	protein_coding	2920	1.73864	6.55585	3.11674	6.85589e-06	0.000299882
RP11-7F17.3	lincRNA	2793	0.00494047	1.00015	3.11636	4.06101e-05	0.00102379
AC007743.1	antisense	3713	0.00805943	0.405226	3.11612	2.94837e-05	0.000826027
LINC00934	lincRNA	2381	0	0.763419	3.10801	0.000732367	0.00575289
CECR2	protein_coding	10211	0.0884135	0.530573	3.10503	1.75543e-05	0.000582727
ELAVL2	protein_coding	5140	0.00512664	0.21088	3.10472	7.69337e-06	0.00032405
ABLIM3	protein_coding	7225	0.0225202	0.439414	3.1046	0.000806402	0.00611997
LINC01135	lincRNA	996	0.120516	1.8056	3.10455	0.000119078	0.00203021
MAGI1	protein_coding	11649	0.333245	1.95584	3.10241	0.00385743	0.0145262
RP11-108M9.3	lincRNA	2963	0.0668269	0.484345	3.10096	3.68981e-05	0.000956919
CA12	protein_coding	7313	0.010688	0.276833	3.10026	0.000108245	0.00190803
SOX13	protein_coding	7420	0.0639153	0.369387	3.09647	0.000168868	0.00248931
FJX1	protein_coding	2450	0.478152	3.88814	3.09186	0.000328473	0.00375897
IRX5	protein_coding	2845	0.0681517	0.559057	3.09159	8.2791e-05	0.00162026
EN2	protein_coding	3395	0	0.337984	3.0887	3.95479e-06	0.000204437
GNG12-AS1	antisense	3465	0	0.702358	3.08748	4.1084e-05	0.00103319
EGR2	protein_coding	3689	2.06202	12.4399	3.08504	5.18006e-05	0.00120135
CELF4	protein_coding	6532	0.00768663	0.218195	3.08502	2.43223e-05	0.000729089
HES4	protein_coding	1118	1.38505	9.30083	3.0786	0.00320945	0.0128219
CAMK1	protein_coding	2720	0.719531	4.76921	3.07785	0.00494348	0.0174336
LINGO1	protein_coding	4902	0.0148939	0.298601	3.07753	2.57612e-05	0.000753473
SOX21	protein_coding	2778	0.0526217	0.554484	3.07645	8.40708e-05	0.00163488
MXRA8	protein_coding	3622	0.0245031	0.714626	3.07629	0.000289651	0.00347562
ADAMTSL3	protein_coding	9754	0.0321461	0.486048	3.07531	0.00116712	0.00715683
HSPB1	protein_coding	1634	18.1592	334.166	3.07364	0.00266708	0.0113361
LRRN3	protein_coding	3875	0.0195717	0.455245	3.06962	2.0457e-05	0.000648919
LINC01539	lincRNA	3458	0	0.286621	3.0673	1.39106e-05	0.00050075
CAMK2N1	protein_coding	2615	0.0156167	0.415225	3.06437	3.45022e-06	0.000186847
NCAM1	protein_coding	12735	0.0537345	0.350981	3.06424	0.00253082	0.0109253
BDNF	protein_coding	7740	0.0344143	0.283623	3.06262	0.000263117	0.00327627
FIBCD1	protein_coding	3831	0	0.237976	3.06253	0.000102015	0.00183724
ZDHHC11B	protein_coding	4840	0.0470225	0.854237	3.06153	0.000467644	0.00450706
ARAP3	protein_coding	6186	0.312038	2.58293	3.06068	0.000642513	0.00531922
EPS8	protein_coding	6200	0.38364	2.63104	3.06004	4.54382e-05	0.00110435
RP11-252C15.1	lincRNA	1259	0.0273395	1.28827	3.05726	0.000131773	0.00215683
CTRC	protein_coding	3486	0.114782	1.46463	3.0572	0.00522591	0.0181729
EMP2	protein_coding	8718	0.0295803	0.26504	3.05608	0.000248061	0.00315926
CTC-459M5.2	antisense	1167	0.0142158	0.807019	3.05435	0.000421583	0.00431503
RBMS3	protein_coding	18339	0.0533041	0.305611	3.05406	0.000419795	0.0043015
SVEP1	protein_coding	14190	0.037427	0.298444	3.0535	0.00179347	0.00869715
HIST1H1T	protein_coding	718	0.291942	3.40975	3.05297	5.01533e-05	0.00117648
AQP9	protein_coding	3235	0.0252491	0.420543	3.05265	0.000285917	0.0034485
LINC01544	lincRNA	5168	0	0.174079	3.05179	0.000113833	0.00196811
DOK6	protein_coding	9387	0.0620384	0.579133	3.05116	0.00349835	0.0135632
PTPRQ	protein_coding	10398	0.033634	0.295602	3.04952	0.000750412	0.00585123
CDHR3	protein_coding	7087	0.0165458	0.226789	3.04178	8.08795e-05	0.00159505
RP1-86C11.7	lincRNA	565	0.244499	2.53705	3.04055	0.000187765	0.00264972
SGCE	protein_coding	2547	0.0453762	0.714029	3.03877	0.000151988	0.0023452
CD83	protein_coding	2515	8.05217	99.204	3.03784	7.27543e-05	0.00149995
RP11-420L9.5	antisense	2761	0.0213637	0.611711	3.03748	4.89871e-05	0.00116244
ADAMTS4	protein_coding	10334	0.0381203	0.27681	3.03651	0.00020915	0.00282292
GOLM1	protein_coding	4233	2.72398	17.5202	3.03552	1.06661e-07	1.69696e-05
DHDH	protein_coding	1081	0.0704219	1.88579	3.03549	0.000246264	0.00314158
GLI3	protein_coding	9239	0.0219754	0.563978	3.03391	0.0022907	0.0102117
ZMYND15	protein_coding	3303	0.040438	0.78742	3.03303	0.000620456	0.00521251
CTSL	protein_coding	2366	2.23216	14.713	3.03284	0.0275672	0.0623031
PDLIM4	protein_coding	3192	0.0233206	0.492854	3.03185	9.18915e-05	0.00172338
LURAP1L-AS1	antisense	799	0.00655735	1.38959	3.02979	0.000266497	0.00330094
C6orf99	lincRNA	859	0.108829	1.85127	3.02675	3.57627e-05	0.000938573
PRTG	protein_coding	14566	0.162288	0.726992	3.02491	4.01605e-06	0.000206306
FLRT3	protein_coding	5190	0.0204315	0.293581	3.02452	4.64232e-05	0.00111833
CDKN2B	protein_coding	4058	0	0.343513	3.0232	1.96874e-05	0.000633007
HEPH	protein_coding	7113	0.0555482	0.365519	3.02301	0.000200598	0.00275104
PAMR1	protein_coding	3863	0	0.392842	3.0206	1.38504e-05	0.000499167
NR2F1-AS1	antisense	7720	0.0186602	0.227137	3.02006	0.00012258	0.00207372
FAM198B	protein_coding	7880	0.713979	3.58292	3.01953	1.29685e-06	9.50384e-05
DNAH9	protein_coding	16980	0.0159079	0.218633	3.01875	0.00092728	0.00669954
ENTPD1	protein_coding	6975	0.311809	2.32773	3.01716	7.18166e-05	0.00149088
ABCA8	protein_coding	11243	0.0097092	0.151465	3.01558	0.000148799	0.00231404
WISP1	protein_coding	3844	0.00206455	0.39553	3.01492	4.4764e-05	0.00109488
STAB1	protein_coding	10588	1.96486	18.7173	3.01437	0.000106359	0.00189216
ATF3	protein_coding	4040	3.90101	36.4167	3.00857	5.07817e-05	0.0011852
PRRG3	protein_coding	6364	0.00416464	0.195221	3.0067	4.93995e-05	0.00116861
CLDN1	protein_coding	3663	0.00216657	0.244263	3.0066	9.24553e-06	0.000370618
IGF1	protein_coding	8087	0.0372475	0.364266	3.00593	0.00140202	0.0075507
GAL	protein_coding	1300	0.622624	4.35304	3.00571	0.00436308	0.0158961
RTL1	protein_coding	4193	0.00841974	0.280595	3.00465	3.10103e-05	0.000853228
LINC01783	lincRNA	2068	0.0628775	1.29998	3.00355	0.00101555	0.00706311
PCA3	antisense	3922	0	0.43154	3.00262	0.000124192	0.00208771
CKB	protein_coding	2669	2.46476	14.9068	3.0021	6.88743e-06	0.000300405
ADAMTS17	protein_coding	8242	0.0565009	0.363138	3.00165	0.000136915	0.00220457
BNC2	protein_coding	15323	0.0254934	0.168932	3.0016	0.000185085	0.00262869
SERTAD1	protein_coding	2114	1.79217	14.1129	3.00057	3.71237e-05	0.000959904
GFAP	protein_coding	12110	0.00886941	0.103632	2.99971	3.02534e-05	0.000839928
KCNN1	protein_coding	3981	0.0405921	0.508749	2.99895	0.000610177	0.00516004
CCL5	protein_coding	1512	1.13634	8.83748	2.99893	0.00127652	0.00721051
SRRM4	protein_coding	8835	0.0258644	0.276264	2.99854	0.00134206	0.00736141
CP	protein_coding	7296	0.0325915	0.170789	2.99846	5.52438e-05	0.00125653
LINC00559	lincRNA	3867	0.0300697	0.575714	2.99806	0.000524004	0.00476461
LINC01558	lincRNA	2146	0	0.587552	2.99706	8.98124e-05	0.0016971
LHX8	protein_coding	3977	0	0.273777	2.99595	8.72036e-05	0.00166833
PTPRK	protein_coding	9000	0.208634	1.06125	2.99557	0.000379158	0.00410233
IL6	protein_coding	2069	0.0120961	0.681339	2.99389	2.16737e-05	0.000673594
STEAP4	protein_coding	11245	0.0342264	0.439265	2.99354	0.00331367	0.0130998
RP11-501C14.5	antisense	428	0	1.63643	2.99348	4.39481e-07	4.55902e-05
TNFAIP6	protein_coding	1579	0.334372	3.72492	2.99311	0.00843121	0.0256178
IL10RA	protein_coding	8102	1.74405	10.246	2.99055	0.00661922	0.0216085
CTC-340A15.2	antisense	6294	0.00212238	0.442818	2.98842	5.47434e-05	0.00124978
DHH	protein_coding	1936	0.0319222	0.778922	2.98375	2.5218e-05	0.000743133
HIST1H4J	protein_coding	373	0.244412	4.44147	2.98249	4.31177e-05	0.001066
SGK1	protein_coding	9992	1.38569	8.57371	2.98057	5.35419e-06	0.000250237
CFAP61	protein_coding	7322	0.0223788	0.242744	2.9796	0.000317559	0.00368378
GREB1	protein_coding	12361	0.0645565	0.502211	2.97834	0.000953709	0.0068183
SRPX2	protein_coding	7548	0.0533091	0.265464	2.97814	0.00130504	0.00726391
LRFN5	protein_coding	6140	0.00727771	0.333314	2.9771	2.14842e-05	0.000670057
APOE	protein_coding	2191	7.48792	33.1862	2.97663	0.00307332	0.0124482
SCN1A	protein_coding	12140	0.00579244	0.164454	2.97638	3.8299e-05	0.000982463
GUCY1A2	protein_coding	16361	0.0074023	0.210926	2.97637	0.00130539	0.00726391
ISLR	protein_coding	2671	0	0.319695	2.9763	2.56675e-06	0.000150123
KIF1A	protein_coding	12357	0.023178	0.193115	2.97618	2.84098e-05	0.000807733
AC142293.3	antisense	732	0	1.26968	2.97609	0.000284184	0.00343685
CTC-524C5.2	antisense	1938	0.135154	0.863982	2.97398	0.000233752	0.00303545
LIPI	protein_coding	1744	0	0.500304	2.9734	0.000185703	0.00263381
RHOV	protein_coding	1705	0.104602	1.18749	2.97325	0.000303016	0.00356765
CBARP	protein_coding	4543	0.130954	0.961597	2.97255	0.000135336	0.00219062
CDKN1C	protein_coding	2586	1.18499	11.7357	2.97077	0.0004056	0.00425063
NRG3	protein_coding	5072	0.245998	0.683237	2.97005	0.0024066	0.0105555
SLC35D3	protein_coding	2359	0.145759	2.36423	2.96811	0.00438623	0.0159615
KCNK13	protein_coding	2522	0.0347712	0.672787	2.96723	0.000130003	0.00213837
SMIM21	protein_coding	4009	0.00240369	0.345535	2.96464	0.000544007	0.00485061
OLFML1	protein_coding	3436	0.0250496	0.450753	2.96246	9.38718e-05	0.0017427
FSCB	protein_coding	2938	0	0.28199	2.9616	9.19441e-05	0.00172338
BOC	protein_coding	10330	0.0277128	0.158577	2.9609	0.000389696	0.00415041
IGFN1	protein_coding	12116	0.0234418	0.150021	2.96053	0.000499092	0.00464539
MMP19	protein_coding	4672	0.0727937	1.70616	2.96042	0.00529051	0.0183249
PAPSS2	protein_coding	4083	0.423337	2.59168	2.95973	4.32979e-05	0.0010681
PLAT	protein_coding	6618	0.0536285	0.773717	2.95787	0.00122629	0.00715683
MUC17	protein_coding	14579	0.0327059	0.260366	2.95775	0.000976987	0.00690752
GIMAP4	protein_coding	2193	1.68288	13.6485	2.957	0.0135028	0.0361733
NEBL	protein_coding	13654	0.0109315	0.124201	2.95581	9.11587e-05	0.0017141
CD7	protein_coding	2735	1.49092	8.80209	2.9556	4.64702e-08	9.90913e-06
SERPINB2	protein_coding	2748	0.184901	1.59095	2.95053	0.0030602	0.0124114
TSPAN15	protein_coding	2646	0.311199	2.60267	2.94986	0.00134699	0.00736621
MTNR1B	protein_coding	1956	0.00539991	0.702781	2.94714	0.000935874	0.00673832
THBD	protein_coding	4109	0.807031	3.32568	2.9446	0.000115728	0.00199247
DPYSL5	protein_coding	7079	0.0234212	0.276467	2.94337	0.000452559	0.0044697
SMAD6	protein_coding	8563	0.419743	2.68875	2.94075	5.72966e-06	0.000264564
MYO5B	protein_coding	10488	0.0372868	0.201483	2.93844	0.000562201	0.00494263
DMRTA1	protein_coding	5569	0.0212215	0.201252	2.93713	4.64447e-05	0.00111833
NOTCH3	protein_coding	9394	0.0757964	1.05311	2.93589	0.00759397	0.0237819
RP11-734I18.1	lincRNA	734	0.120211	2.53021	2.93499	0.00028447	0.0034376
NRAP	protein_coding	5724	0.0299402	0.254579	2.9328	0.000272227	0.00334762
IBSP	protein_coding	1546	0.0214617	1.34421	2.9314	0.00205965	0.00947707
CHRNA3	protein_coding	4765	0.00303349	0.206913	2.92822	7.72294e-06	0.00032485
ZFHX4	protein_coding	15687	0.016423	0.253641	2.92691	0.00261941	0.011185
PTGES2-AS1	lincRNA	2100	0.026549	0.410345	2.92628	3.62227e-06	0.000193436
FAM26E	protein_coding	9784	0.0256256	0.133582	2.9244	0.000240958	0.00309576
MAFA	protein_coding	2504	0.120918	3.12509	2.92428	0.0093744	0.0276593
C5AR1	protein_coding	2951	0.248512	3.25175	2.92269	0.0032949	0.0130614
RP11-173E2.2	lincRNA	563	0	1.69187	2.9224	0.000182649	0.0026073
SEMA3A	protein_coding	9371	0.0160557	0.309988	2.92136	0.00130162	0.00726287
GABRA6	protein_coding	3738	0.00456932	0.379036	2.92119	0.000168617	0.00248921
CTD-2358C21.5	lincRNA	533	0.0148896	1.29631	2.91617	2.91267e-06	0.000164708
TRH	protein_coding	1978	7.6708	57.4744	2.91562	0.00142941	0.00763278
PDE3A	protein_coding	8398	0.902466	5.61767	2.91511	0.0170799	0.0432827
LHX2	protein_coding	2655	0.00197338	0.524497	2.91482	2.32929e-05	0.000710745
PDGFA	protein_coding	4151	0.443385	5.21653	2.91477	0.00390509	0.0146428
SELENBP1	protein_coding	3504	0.940913	5.07192	2.91377	0.00391006	0.0146507
PCDH18	protein_coding	6686	0.0276347	0.322512	2.91118	0.000347412	0.00390812
FIBIN	protein_coding	1938	0.00683791	0.578737	2.91096	6.90808e-05	0.00144788
TGFBI	protein_coding	7810	5.52308	8.53809	2.91096	0.0405265	0.0839851
FAM135B	protein_coding	13625	0.0208265	0.21685	2.91083	0.000841807	0.00628612
NPAS2	protein_coding	12491	0.0143296	0.149035	2.90821	0.000542444	0.0048478
C17orf107	protein_coding	3408	0.677071	5.41312	2.90547	1.74184e-05	0.000581313
ARSH	protein_coding	1875	0	0.490769	2.90541	0.000108153	0.00190798
GPR84	protein_coding	2043	0.273109	2.82742	2.90469	0.00568906	0.0192834
FAM131B	protein_coding	6430	0.0645658	0.375597	2.90338	0.000407948	0.00425781
HAND2	protein_coding	3601	0.0259107	0.862304	2.90302	0.000778058	0.00599524
ACSL6	protein_coding	13013	0.00859559	0.15821	2.90273	0.000285933	0.0034485
ASGR2	protein_coding	2490	0.663239	2.40093	2.90035	0.00609975	0.0203122
B4GALNT3	protein_coding	6357	0.063923	0.275406	2.90033	0.000149193	0.00231487
CDC20B	protein_coding	4496	0.0202855	0.426413	2.89995	0.000568138	0.00495321
TNFRSF13B	protein_coding	3550	0.00605701	0.334514	2.89968	7.77442e-05	0.00155747
CCDC185	protein_coding	2054	0	0.494618	2.89942	0.000109029	0.00191524
C17orf102	lincRNA	3997	0.00120545	0.458406	2.89719	0.000258	0.00324811
NPNT	protein_coding	6117	0.0107438	0.265813	2.89594	0.000188662	0.00265858
FOXA1	protein_coding	3982	0.0163284	0.241869	2.89575	2.33762e-05	0.000711047
ENTPD2	protein_coding	2633	0.00399443	0.406064	2.89574	1.06823e-05	0.000413634
KIRREL2	protein_coding	3382	0.00234658	0.367116	2.89547	1.34872e-05	0.000490609
ANKRD55	protein_coding	2979	0.0793942	0.774885	2.89362	0.000503692	0.0046698
COL12A1	protein_coding	12481	0.0179909	0.570211	2.89332	0.00534095	0.018458
TLL1	protein_coding	7522	0.00561671	0.250183	2.89309	0.000269393	0.00332075
EXOC3L1	protein_coding	3077	0.119866	0.693822	2.89302	0.000480193	0.00455086
FAM84A	protein_coding	8384	0.00313613	0.107906	2.89263	1.17892e-05	0.000445813
FILIP1	protein_coding	8906	0.0503832	0.558851	2.89243	0.00105183	0.00715683
SUCLG2-AS1	lincRNA	3032	0.0067859	0.569668	2.88836	0.000131411	0.0021532
IGSF21	protein_coding	3085	0.0175569	1.84663	2.88793	0.00137236	0.00744387
TENM2	protein_coding	11042	0.0242838	0.474303	2.8879	0.00191015	0.00903789
FABP7	protein_coding	2728	0.0156526	0.587345	2.88697	0.000384327	0.00412772
RP1-78B3.1	lincRNA	8149	0.00236505	0.100633	2.88601	7.93034e-06	0.000331756
ADAMTS1	protein_coding	7063	0.670332	2.99135	2.88552	0.0140464	0.037261
AC096669.1	lincRNA	1305	0.00805926	0.684972	2.88427	0.000200468	0.00275104
RP11-907D1.2	lincRNA	840	0	1.12106	2.88409	0.0001266	0.00210699
KIR3DX1	protein_coding	5115	0.00613149	0.165487	2.88362	1.77958e-05	0.000584814
TRPV6	protein_coding	11909	0.0201483	0.310384	2.88323	0.000412033	0.00427466
ZFAND2A	protein_coding	2281	4.33629	93.682	2.88252	0.00855725	0.0259003
RP11-386B13.3	lincRNA	2526	0.00208181	0.668582	2.88089	0.000336799	0.00382603
INCA1	protein_coding	1553	0.00677227	0.499514	2.879	3.20387e-06	0.000177185
ADGRB3	protein_coding	6490	0.0502132	0.37261	2.87879	0.0013372	0.00735122
TSPAN11	protein_coding	7113	0.0377134	0.491693	2.87647	0.00132315	0.0073165
TLE2	protein_coding	4038	0.0632806	0.496975	2.87622	0.000297324	0.00351952
PALMD	protein_coding	8244	0.0201281	0.347775	2.87577	0.000290942	0.00348389
MUC16	protein_coding	43830	0.0267303	0.199717	2.87414	0.000671061	0.00546568
RIMS1	protein_coding	12788	0.0270314	0.281372	2.87327	0.000145891	0.00229576
CTC-526N19.1	lincRNA	2040	0.033618	0.783788	2.87211	0.000349875	0.00391947
MAP1LC3A	protein_coding	1762	0.744704	3.96968	2.87107	9.48479e-06	0.000378725
MYCL	protein_coding	5063	1.07218	1.53209	2.87102	0.0131931	0.0355764
AC026904.1	lincRNA	3549	0	0.349027	2.87038	0.00027707	0.00337838
FHDC1	protein_coding	6593	0.250545	1.17651	2.86997	0.000589489	0.00504342
CDH13	protein_coding	11187	0.0162655	0.186648	2.86876	0.000237947	0.00306922
PWRN1	lincRNA	4833	0.00561806	0.249617	2.86757	6.77489e-05	0.00143004
CTGF	protein_coding	2339	4.81414	19.4877	2.86457	0.00148623	0.00776653
CTB-51J22.1	antisense	532	0.0359065	2.84132	2.86182	0.000173307	0.00252206
PART1	lincRNA	9752	0.0148001	0.309081	2.86158	0.00105694	0.00715683
CTD-2545M3.8	lincRNA	626	0.110813	2.55588	2.86111	0.000368656	0.0040432
RP11-415D17.3	antisense	2237	0.00468424	0.549595	2.8609	0.000216972	0.00289548
RBFOX3	protein_coding	9873	0.0737053	0.48678	2.8595	0.00210725	0.00961729
PTPN14	protein_coding	18756	0.08667	0.526789	2.85887	4.03609e-07	4.3485e-05
GNAO1	protein_coding	13697	0.266382	0.230618	2.85561	0.0026485	0.011281
FREM2	protein_coding	16223	0.0259645	0.13471	2.85212	0.00119177	0.00715683
NRN1	protein_coding	2328	0.0682448	0.787423	2.85176	0.000308657	0.00361603
NFIB	protein_coding	12765	0.344314	1.42424	2.8512	0.0206433	0.0498837
CALCA	protein_coding	2128	0.0107421	0.483361	2.85001	1.2234e-05	0.00045924
RP11-727F15.14	protein_coding	485	0	1.41533	2.84874	4.10943e-06	0.000209261
NTN1	protein_coding	6383	0.257609	1.48694	2.84828	7.61609e-05	0.00153941
NOS3	protein_coding	5953	0.490333	2.6592	2.84816	0.0154032	0.0398962
RP11-1100L3.8	lincRNA	915	0.023857	1.68108	2.84748	0.000428605	0.00434778
TBX2	protein_coding	6029	0.0773152	0.505326	2.84672	0.00434601	0.0158452
LINC00927	lincRNA	3664	0.0023308	0.256077	2.84566	1.58343e-05	0.000549387
PLD5	protein_coding	9545	0.000894715	0.084307	2.84346	0.000111586	0.00194459
BHLHE22	protein_coding	3262	0.00583038	0.39862	2.84323	3.36471e-05	0.000904701
GABRB2	protein_coding	10002	0.000853835	0.127987	2.84237	9.65475e-05	0.0017739
FXYD2	protein_coding	5595	0.087442	0.751771	2.84195	0.00251876	0.010887
CTCFL	protein_coding	8928	0.00161902	0.0719897	2.83858	3.84869e-07	4.22064e-05
MMP15	protein_coding	4419	0.380122	2.79679	2.83848	0.00320142	0.0127982
SRCIN1	protein_coding	11658	0.0297943	0.186722	2.83643	0.000371997	0.00405872
EPB42	protein_coding	5574	0.621028	3.1198	2.83562	0.000390126	0.00415041
PLK2	protein_coding	4768	3.99394	14.3606	2.83297	5.51423e-05	0.00125515
AC069363.1	antisense	1706	0.0596437	1.10359	2.83261	0.000565533	0.00494626
CTD-2639E6.9	lincRNA	946	0.700196	5.02378	2.83228	0.000267021	0.00330345
SYT7	protein_coding	5953	0.0023584	0.184659	2.8321	4.4675e-06	0.000223117
CD248	protein_coding	2558	0.760234	3.07691	2.83057	0.00144913	0.00768672
POU3F1	protein_coding	2184	0.0512378	1.64144	2.83035	0.00194195	0.00911963
AC124057.5	antisense	404	0.586137	4.06663	2.82952	0.000186604	0.0026417
RP11-325F22.2	lincRNA	1034	6.06458	50.0537	2.82866	0.00177703	0.00863789
CDH16	protein_coding	3656	0.0221722	0.293674	2.8255	7.52427e-05	0.0015321
GP9	protein_coding	889	1.69732	17.6746	2.8248	0.0244096	0.0566917
SRL	protein_coding	5702	0.00533819	0.217269	2.82333	4.54256e-05	0.00110435
L1CAM	protein_coding	7422	0.00493647	0.223067	2.82331	0.000166224	0.00246693
AC005592.2	antisense	1811	0	0.45005	2.82187	0.000200553	0.00275104
RP11-496N12.9	lincRNA	559	0.473072	3.78352	2.82083	0.00115861	0.00715683
CLEC4F	protein_coding	2475	0.0517579	0.649487	2.82001	0.000637693	0.00530076
SERPINC1	protein_coding	1768	0.0736439	1.11883	2.81936	0.000764746	0.00592538
RBM24	protein_coding	3444	0.037893	0.699427	2.81837	0.000628295	0.00526109
TMEM108	protein_coding	8425	0.0438721	0.299735	2.81668	0.00089482	0.0065576
FER1L5	protein_coding	10444	0.0248413	0.146204	2.8157	0.000526543	0.00477994
ABI3	protein_coding	2456	2.41885	5.91081	2.81558	0.00863572	0.026071
THSD7B	protein_coding	6761	0.0238455	0.250722	2.81428	0.000443328	0.00442893
TRPV4	protein_coding	3759	0.026195	0.89607	2.8125	0.000969531	0.00687709
CHIA	protein_coding	4632	0.0147497	0.234611	2.81235	0.00100084	0.00701318
SIM1	protein_coding	9274	0.0171056	0.15496	2.80951	0.000372315	0.00405872
RP11-490O6.2	antisense	2597	0.113941	1.06112	2.80885	0.000508074	0.00469201
CCNJL	protein_coding	4736	0.249735	1.44555	2.8088	4.93733e-05	0.00116861
CLEC14A	protein_coding	2267	0.852228	4.40428	2.80832	9.66469e-05	0.0017739
RP11-492E3.2	lincRNA	2449	0	0.308713	2.80809	4.03413e-05	0.00102036
CADPS2	protein_coding	6351	0.0299308	0.224541	2.80709	0.00017486	0.00252909
TMEM26	protein_coding	6907	0.0278663	0.353759	2.80483	0.000574991	0.00498567
ERICH6B	protein_coding	2940	0.0477192	0.565985	2.8018	0.000364899	0.00402358
LINC00371	protein_coding	3617	0.037679	0.395838	2.79899	0.00136258	0.00740649
TREML4	protein_coding	2712	0.147238	0.516794	2.79701	0.000427787	0.00434519
SLC6A9	protein_coding	5159	0.168296	1.02811	2.79598	0.000176659	0.00255219
ADTRP	protein_coding	4150	0.010869	0.258823	2.79568	4.98662e-05	0.00117527
ST5	protein_coding	14262	0.0803506	0.714325	2.79364	0.000328827	0.00375906
SIGLEC7	protein_coding	2043	0.25095	2.06048	2.79211	0.00617507	0.0204875
LINC01146	lincRNA	2807	0.011747	0.542323	2.79141	0.000216977	0.00289548
SEMA3F	protein_coding	4826	0.186087	1.0743	2.78889	5.11563e-07	5.10002e-05
GP5	protein_coding	3534	0.301336	5.32738	2.7887	0.0201179	0.0489604
CMKLR1	protein_coding	5690	0.543771	3.70661	2.78717	0.041075	0.0849154
GABRA3	protein_coding	4193	0	0.206793	2.78604	1.99257e-05	0.000637331
ADORA2A-AS1	antisense	4025	0.0371343	0.343689	2.78356	0.000333485	0.00379963
ULBP2	protein_coding	1349	0.0253226	0.741093	2.78073	8.08394e-05	0.00159505
VCAN	protein_coding	14831	0.914132	3.65816	2.78011	0.00263104	0.0112269
MIR137HG	lincRNA	6006	0.00862969	0.158615	2.77688	3.03398e-05	0.000841567
CSMD2	protein_coding	18157	0.0130262	0.169552	2.7767	0.00146848	0.00774099
SERPINA5	protein_coding	3775	0.0081747	0.392014	2.7766	0.000320232	0.00370377
WBSCR27	protein_coding	1469	0.132515	1.25777	2.77508	0.00077241	0.0059622
MYOCD	protein_coding	8875	0.00917467	0.170531	2.77479	0.00048287	0.00456215
LTA	protein_coding	1737	0.128043	2.95016	2.77329	0.0134294	0.0360199
PRICKLE2-AS1	antisense	6505	0	0.0533308	2.77329	2.02669e-06	0.000129111
WNK3	protein_coding	11472	0.119835	0.374414	2.77225	0.00028939	0.00347562
DLGAP1	protein_coding	12106	0.0225003	0.371947	2.7722	0.00441152	0.0160156
SRPX	protein_coding	1987	0.175624	2.32359	2.77094	0.0108556	0.0308099
ANGPTL2	protein_coding	3889	0.058306	0.534891	2.76938	0.00108148	0.00715683
TM4SF1	protein_coding	3668	0.516386	2.33091	2.76807	0.00270998	0.0114688
RP11-490O24.2	lincRNA	631	0	1.06849	2.76758	0.000135971	0.00219397
LINC00511	lincRNA	8615	0.0835527	0.397455	2.76644	3.42412e-05	0.000915864
EYA1	protein_coding	5170	0.045312	0.365714	2.76625	0.000327127	0.00374951
KIAA2022	protein_coding	11757	0.0342378	0.183268	2.76458	0.002592	0.0111113
RP11-672A2.4	lincRNA	651	0.0342848	1.15842	2.7644	1.3461e-05	0.000490609
FARP1	protein_coding	36228	0.129652	0.733658	2.76437	3.51932e-07	3.94395e-05
TIMD4	protein_coding	1555	0.190567	29.1236	2.76262	0.043183	0.0881928
ANKRD18B	protein_coding	5857	0.165534	1.35679	2.7622	0.0160326	0.0411758
ME1	protein_coding	3371	0.0434523	0.902752	2.76181	0.0012218	0.00715683
DTX1	protein_coding	4387	2.00251	7.67969	2.76109	0.0138049	0.036807
ALDOB	protein_coding	2451	0.00476078	0.355597	2.75959	4.64725e-05	0.00111833
HFE	protein_coding	5675	0.0614822	0.580051	2.75793	0.001841	0.0088176
RBP7	protein_coding	861	0.0368022	2.03368	2.7571	0.000206673	0.00279934
BDKRB2	protein_coding	6845	0.00346415	0.119358	2.75519	1.1493e-05	0.000437302
TFCP2L1	protein_coding	9372	0.118631	0.406303	2.75504	0.00923663	0.0273844
GPR20	protein_coding	1515	0	0.304367	2.75387	8.72416e-07	7.20118e-05
GJA1	protein_coding	3037	0.015666	0.696349	2.75383	0.00049493	0.00463221
COL7A1	protein_coding	11071	0.148922	2.23029	2.75355	0.00462793	0.0165662
AP000350.5	lincRNA	5637	0.185375	0.519889	2.75322	0.0109471	0.0310037
DKK2	protein_coding	4319	0.0210529	0.598111	2.75305	0.00191118	0.00903789
DNM3OS	antisense	4358	0.00546969	0.231715	2.75235	1.73666e-05	0.00058026
SEPT4	protein_coding	8012	0.0833625	0.414448	2.75157	0.000200159	0.00275053
RP11-153K16.2	lincRNA	1329	0	0.448896	2.75031	0.000299244	0.00353618
TBX3	protein_coding	5950	0.0122194	0.145075	2.75028	3.11075e-05	0.000855136
CTD-3203P2.3	antisense	715	0.0356764	1.17899	2.74897	6.94126e-05	0.00145289
DAB2IP	protein_coding	8408	0.297327	2.15721	2.74759	4.55682e-05	0.00110435
HEY1	protein_coding	3232	0.0624731	0.451048	2.74562	0.000442234	0.0044234
RP11-673E11.2	lincRNA	1909	0	0.511246	2.74545	0.000495061	0.00463221
NPAP1	protein_coding	7526	0.00783753	0.236189	2.74504	0.000655298	0.00538442
C8orf49	lincRNA	1968	0	0.303391	2.74364	2.35505e-06	0.00014348
ANGPTL4	protein_coding	2482	0.0792206	0.880734	2.74341	0.00121505	0.00715683
FCGR2B	protein_coding	6651	0.0580616	0.571981	2.74113	0.0037255	0.014193
EFNA5	protein_coding	5703	0.00503922	0.228877	2.73985	0.000218086	0.00290145
GADD45G	protein_coding	1322	0.637821	10.8146	2.73976	0.015564	0.0402416
HSPH1	protein_coding	8390	13.7819	246.877	2.73904	0.0134464	0.0360503
FLJ31104	antisense	2289	0.140669	1.15451	2.7385	0.00029015	0.00347738
GIMAP5	protein_coding	6031	0.0257597	0.25995	2.73844	0.000641177	0.00531494
SMIM25	lincRNA	2451	0.0190431	0.581828	2.737	0.000544553	0.00485231
CCDC170	protein_coding	5419	0.0341131	0.461455	2.73667	0.00381404	0.0144087
MOGAT3	protein_coding	2218	0.00952702	0.542669	2.7347	0.00115619	0.00715683
RP11-168O16.1	antisense	3508	0.0384029	0.560637	2.73309	0.00143064	0.00763278
EDN3	protein_coding	2675	0.00195862	0.27345	2.73007	0.00042194	0.00431503
RP11-560G2.1	antisense	2356	0	0.47484	2.7287	0.000413568	0.00427632
ESRRG	protein_coding	10912	0.0193341	0.230266	2.72858	0.00258415	0.0110853
TRPM8	protein_coding	7903	0.00897561	0.253641	2.72829	0.00127413	0.0072011
CNTN5	protein_coding	9103	0.00160957	0.0802928	2.72754	0.000141677	0.0022494
SEC14L6	protein_coding	3392	0.0288359	0.298603	2.72663	0.000259585	0.00325365
IL13RA1	protein_coding	4372	1.7154	2.88353	2.7251	0.00911348	0.0270978
SLC5A8	protein_coding	4178	0.00773285	0.273399	2.7233	0.000956526	0.00683526
CACNA1G	protein_coding	9709	0.0466577	0.275319	2.72176	0.000562059	0.00494263
FAM222A-AS1	antisense	1068	0.0296692	1.09052	2.72048	0.00204316	0.00944503
RP11-57C13.6	lincRNA	495	0	1.10209	2.72042	0.000222535	0.00293142
PDZRN3	protein_coding	6136	0.0189209	0.183258	2.72003	0.000206361	0.00279758
RASL11A	protein_coding	1624	1.02577	5.29175	2.71997	2.49203e-05	0.000737804
SLFN14	protein_coding	2889	0.267909	2.05931	2.71994	0.00713466	0.0228277
SLC16A6	protein_coding	4061	0.132692	0.855285	2.71676	0.00333752	0.0131708
FAM155A	protein_coding	8503	0.00983603	0.14566	2.71602	0.000128063	0.00212153
MCC	protein_coding	10746	0.113232	0.601366	2.71445	0.00117021	0.00715683
CAMKV	protein_coding	3900	0.12397	0.725651	2.71267	0.00344563	0.0134608
OTOF	protein_coding	7885	0.00779963	0.135141	2.71211	0.000125214	0.00209528
KLF15	protein_coding	2848	0.0422413	0.358572	2.71209	0.000112264	0.00194865
MRAP2	protein_coding	2153	0	0.33755	2.71134	2.11734e-05	0.000665457
HBA1	protein_coding	835	13.0805	91.2735	2.71107	0.0485085	0.0965392
MIR503HG	lincRNA	1678	0.349799	2.4162	2.70974	0.000156221	0.0023806
MGAT4C	protein_coding	27762	0.00188519	0.0592838	2.70662	0.000558515	0.00493377
FCGR2A	protein_coding	5314	1.14263	5.93889	2.70611	2.49411e-05	0.000737804
RP11-85B7.2	antisense	5672	0.00535169	0.210018	2.70497	8.35189e-05	0.00162621
PCAT19	lincRNA	3884	0.0198438	0.258589	2.70493	5.43823e-05	0.00124524
P3H2	protein_coding	5605	0.902339	1.8784	2.70435	0.0151023	0.0393205
RP11-161D15.3	lincRNA	1993	0	0.433488	2.70395	0.000816228	0.00616721
TMCC3	protein_coding	6515	0.301704	0.560088	2.70321	0.00230663	0.0102663
EPPK1	protein_coding	7996	0.514641	1.91531	2.70189	0.0269258	0.0611663
GPR37	protein_coding	3021	0	0.279503	2.70045	2.01782e-05	0.000640735
LINC01411	lincRNA	3800	0	0.278811	2.70013	0.000264647	0.00328732
FAM19A1	protein_coding	2933	0.025161	0.61888	2.69899	0.00465298	0.0166326
SLCO2A1	protein_coding	5283	0.0482855	0.261178	2.69777	0.00130429	0.00726391
KCNA4	protein_coding	4195	0	0.143138	2.69732	1.27287e-05	0.00047433
FOXR1	protein_coding	1237	0.0042355	0.362209	2.6968	9.41915e-05	0.00174567
RP11-203E8.1	lincRNA	491	0	2.50235	2.69619	0.00136862	0.0074293
TBC1D21	protein_coding	1226	0	0.350304	2.69431	7.52223e-05	0.0015321
RND1	protein_coding	3099	0.305991	3.49168	2.69398	0.0150942	0.0393081
ADAMTS9-AS2	antisense	7232	0.00118087	0.123378	2.69362	0.000248926	0.00316625
SLAMF8	protein_coding	2996	0.0694458	0.591044	2.69346	0.0014318	0.00763278
FABP4	protein_coding	1396	0.0464874	1.94284	2.69261	0.0015576	0.00796464
KCNG3	protein_coding	3824	0.00430863	0.342212	2.69146	0.00019582	0.00271093
ADM2	protein_coding	4276	0.197979	1.22885	2.69111	0.0105867	0.0302397
PLA2G7	protein_coding	2026	0.176415	4.93078	2.69111	0.0215407	0.0514171
LINC00475	lincRNA	3858	0.00135804	0.155072	2.69051	0.000306435	0.00359686
MSC-AS1	antisense	6284	0.0249613	0.172133	2.68966	9.47832e-05	0.0017538
VEGFA	protein_coding	14431	1.38529	9.08285	2.68869	1.17908e-07	1.80124e-05
LGI2	protein_coding	6428	0.00398571	0.12572	2.68624	0.000124759	0.00209193
RSPO3	protein_coding	3179	0.0233079	0.845568	2.68326	0.000526857	0.00477994
GAS2L1	protein_coding	4480	1.85005	3.74882	2.68303	0.0059516	0.0199487
PHLDA2	protein_coding	955	0.485013	7.00148	2.68203	0.0117545	0.0327199
DNAJA4	protein_coding	6591	6.06188	80.9838	2.68151	0.00517056	0.0180397
HIST1H1A	protein_coding	648	8.05793	29.6724	2.68137	2.73832e-05	0.000787541
RP11-886P16.6	antisense	511	0.0282868	0.757856	2.67964	2.07037e-06	0.000130495
EFS	protein_coding	3237	0.0488535	0.664521	2.67962	0.00382759	0.0144457
SLC24A2	protein_coding	10749	0.00355485	0.109109	2.6796	0.000111158	0.00194153
APOH	protein_coding	1332	0	0.778958	2.6792	7.42151e-05	0.00151812
HBM	protein_coding	916	1.62932	9.10175	2.67836	0.0318247	0.0695819
AADACL4	protein_coding	1575	0.0066531	0.768617	2.67821	0.0012291	0.00715683
HBE1	protein_coding	928	0.175745	1.8343	2.67804	0.00138165	0.00748236
GALNT9	protein_coding	4634	0.00251806	0.164902	2.67708	4.15656e-05	0.00104104
KITLG	protein_coding	6030	0.0351363	0.32453	2.67693	0.000962297	0.00685894
ASB15	protein_coding	4879	0.00270044	0.177606	2.67581	0.000356707	0.00397137
KCNMA1	protein_coding	35644	0.0187335	0.212827	2.67508	0.00447749	0.0161691
DNAH8	protein_coding	15055	0.0312015	0.148499	2.67436	5.27402e-05	0.00121854
GRM3	protein_coding	4474	0.013092	0.259685	2.67033	0.000147572	0.00230311
CLDN6	protein_coding	1739	0.0817345	0.884512	2.66887	0.000664352	0.0054341
NOVA1	protein_coding	10046	0.0222138	0.168415	2.66803	0.00120323	0.00715683
PRSS12	protein_coding	5725	0.00245232	0.166171	2.66797	8.28543e-05	0.00162046
RP11-290L1.3	antisense	569	0.0169357	0.663059	2.66591	1.91106e-06	0.000124061
ZBTB8B	protein_coding	12834	0	0.0592121	2.66416	0.000133279	0.00217096
UNC45B	protein_coding	5679	0.0129718	0.271937	2.66365	0.000322618	0.00371999
RYR2	protein_coding	17777	0.0407576	0.311328	2.66273	0.00197093	0.00922269
GPC6	protein_coding	6468	0.467337	1.3433	2.66253	0.0174504	0.0439602
CTD-2314G24.2	antisense	7152	0.0165033	0.228197	2.66208	0.00156039	0.00797097
RP5-958B11.1	lincRNA	1227	0	0.682382	2.66116	0.000517604	0.00473273
BOK	protein_coding	2657	0.0957417	0.514761	2.66071	0.000984701	0.00693969
RP11-624C23.1	antisense	1341	0.0196072	0.51364	2.66014	7.1859e-05	0.00149088
APBB2	protein_coding	12956	0.298691	0.951392	2.65757	0.00152706	0.00786348
LINC01353	lincRNA	837	0.160143	2.03733	2.65706	0.00119135	0.00715683
FXYD6	protein_coding	5137	0.372535	1.32774	2.65413	0.0131148	0.0354305
ARG2	protein_coding	2418	1.2296	8.31128	2.65349	0.000425362	0.00433326
MYL9	protein_coding	2821	0.518257	4.79046	2.65336	0.00380329	0.0143876
RAI2	protein_coding	2622	0.00200559	0.173736	2.65298	1.20195e-05	0.000452293
ARSF	protein_coding	2204	0.0077496	0.438711	2.65261	0.00126639	0.0071876
ATP8B1	protein_coding	6652	0.0718216	0.765374	2.65237	0.00284873	0.0118865
ERBB4	protein_coding	13015	0.0134938	0.14909	2.65192	0.000934482	0.00673514
WNT5A	protein_coding	7397	0.0158117	0.123323	2.65131	8.3517e-05	0.00162621
RP11-491F9.8	lincRNA	1851	0	0.419418	2.65119	0.000258691	0.00325215
NECTIN4	protein_coding	3502	0.033473	0.344603	2.65088	0.000816243	0.00616721
VWC2	protein_coding	11299	0.00341934	0.135052	2.65042	0.00115191	0.00715683
HIST1H3E	protein_coding	2679	1.45775	8.51296	2.64988	2.64394e-06	0.000153928
LINC00423	lincRNA	903	0	1.09839	2.64892	0.000593872	0.00505977
SOX6	protein_coding	19636	0.0577938	0.625067	2.64826	0.00726927	0.0230728
RP11-625L16.1	lincRNA	670	0	2.08642	2.64766	0.000619348	0.00520747
NPAS3	protein_coding	9241	0.0266489	0.165029	2.64619	0.000573521	0.00498169
RP11-486I11.2	lincRNA	808	1.3106	7.70543	2.6461	0.00111052	0.00715683
TMEM40	protein_coding	3562	0.0601827	0.621761	2.64526	0.00343135	0.0134152
TRIM15	protein_coding	2515	0	0.278363	2.64365	0.000335811	0.00381763
AC034243.1	antisense	587	0.0716683	1.46429	2.64346	0.0004476	0.00445387
TTC29	protein_coding	3332	0.0185606	0.304162	2.64133	0.000196609	0.0027194
EPS8L3	protein_coding	3477	0	0.12802	2.64131	8.07358e-06	0.000335478
ART3	protein_coding	3278	0.0145262	0.294977	2.64123	0.00177969	0.00864807
LDLR	protein_coding	7718	4.63211	28.6293	2.64057	2.63328e-08	7.08416e-06
DMP1	protein_coding	2682	0.010779	0.280449	2.64033	0.000315452	0.00366626
PCDHAC1	protein_coding	6943	0.00548967	0.130824	2.64022	8.08605e-05	0.00159505
PTPRU	protein_coding	6682	0.122046	0.490913	2.6391	0.000876893	0.00646635
CDR1	protein_coding	2467	0.0574285	0.518894	2.63762	0.000686558	0.00553899
TNFRSF12A	protein_coding	1848	0.749035	5.55806	2.6371	0.000177775	0.002564
CTD-2600O9.1	lincRNA	2104	0.0200803	0.395875	2.6359	0.000240827	0.00309537
ADRA1B	protein_coding	1738	0.108953	0.626212	2.63576	0.00125395	0.0071876
IRS4	protein_coding	3928	0	0.135742	2.63456	2.74042e-05	0.000787541
VEPH1	protein_coding	6554	0.0353575	0.238069	2.63284	0.0010521	0.00715683
FCGR3B	protein_coding	3073	0.00156791	0.246577	2.63224	7.77027e-05	0.00155747
RP11-331G2.7	antisense	1818	0.376002	2.15269	2.63209	0.0101987	0.0294466
AC005363.11	lincRNA	242	0.135138	5.15815	2.63179	0.000293032	0.00349431
COL5A2	protein_coding	7156	0.271716	2.16638	2.63178	0.000205329	0.00278605
PPP1R17	protein_coding	2384	0.00858595	0.684478	2.63108	0.00160393	0.00809165
PTPRT	protein_coding	12943	0.0208859	0.159494	2.62888	0.00148995	0.00777935
OCA2	protein_coding	3299	0.00743787	0.50878	2.6278	0.00211452	0.00963475
ZC3H12A	protein_coding	3121	3.49325	31.4247	2.62676	0.000250294	0.00317584
HSPB7	protein_coding	3910	0.042839	0.260989	2.62572	0.000755237	0.005868
OR7C2	protein_coding	960	0	0.503517	2.62508	0.00019401	0.00269682
RP4-684O24.5	antisense	1802	0.00534761	0.590648	2.62434	0.000246259	0.00314158
RP4-760C5.3	lincRNA	542	0.16241	1.73873	2.6229	0.000117816	0.00201316
CDHR1	protein_coding	7633	0.0437978	0.254663	2.62091	0.00333982	0.0131782
IER3	protein_coding	1356	6.466	43.48	2.62083	0.00223028	0.0100165
CNGB3	protein_coding	5025	0.0146238	0.748753	2.62013	0.0034079	0.0133558
RP4-680D5.9	lincRNA	256	1.66733	12.7945	2.61981	0.000770054	0.00594999
OSBPL10	protein_coding	11976	0.06655	0.465446	2.6192	0.00314791	0.012665
SULF1	protein_coding	9404	0.0427339	0.189203	2.61532	0.00370977	0.0141506
RP11-47I22.2	lincRNA	5148	0.0369193	0.400934	2.61458	0.00168336	0.00832086
STC1	protein_coding	4149	0.0289198	0.178085	2.6133	9.73231e-05	0.00178093
VEGFC	protein_coding	2420	0.0184473	0.441684	2.61259	0.000401643	0.00423518
GPM6B	protein_coding	5675	0.495094	1.79951	2.6121	0.00010263	0.00184723
TF	protein_coding	8565	0.0436815	0.254641	2.61119	0.00351405	0.0136069
TMEM233	protein_coding	3146	0.00334308	0.336667	2.61061	1.40409e-05	0.000504258
ROR1-AS1	antisense	3544	0.00148382	0.234039	2.60965	0.000914415	0.00664569
RP11-284F21.8	lincRNA	1828	0.0143625	0.980065	2.60924	0.000519028	0.00473689
RP13-539F13.3	lincRNA	2807	0.00282727	0.299479	2.60867	0.00111954	0.00715683
APOA1	protein_coding	1424	0.205662	2.63786	2.60748	0.00675129	0.0219324
SLC5A4	protein_coding	2030	0.00867017	0.397653	2.60712	0.000824905	0.00620518
LINC01361	lincRNA	1586	0	0.533323	2.60702	3.8873e-05	0.000994694
RP11-728F11.4	antisense	1464	0.0153133	0.51966	2.60618	5.38406e-05	0.00123745
RP11-436K8.1	lincRNA	4285	0.00958965	0.184977	2.60608	2.29493e-05	0.000704683
FRZB	protein_coding	3162	0.0184213	0.598982	2.60576	0.00105034	0.00715683
ST3GAL5-AS1	lincRNA	783	0.284786	2.08105	2.6055	0.00125376	0.0071876
FAM205A	protein_coding	4225	0.0039266	0.149295	2.6032	0.000752197	0.00585635
CTB-186H2.3	antisense	3952	0.00648284	0.153498	2.60312	2.37706e-05	0.000719114
ASPN	protein_coding	2470	0.0501574	1.08464	2.60194	0.00225028	0.0100761
ZCCHC5	protein_coding	2648	0.0414701	0.647805	2.60116	0.00160642	0.00809545
LINC00092	lincRNA	2306	0.0322502	0.527745	2.60099	0.000365458	0.00402358
FAM64A	protein_coding	2823	0.924423	3.89018	2.60088	1.65068e-05	0.000563174
USH1C	protein_coding	4904	0.00988566	0.14829	2.6006	2.92869e-05	0.000821263
AGXT	protein_coding	4459	0	0.21546	2.5984	7.26953e-05	0.00149995
CTB-50L17.16	lincRNA	837	0.265011	3.11238	2.59815	0.00538561	0.0185393
PPIC	protein_coding	2098	0.0287756	0.304251	2.59757	3.62724e-05	0.000948504
LINC01270	lincRNA	3014	0.00283346	0.277878	2.59679	3.3275e-05	0.000898631
XXbac-BPG13B8.10	lincRNA	877	0.0361308	1.19088	2.59549	0.000356655	0.00397137
RP11-47G4.2	lincRNA	567	0.0467438	1.54958	2.59547	0.00190259	0.00901001
CTD-2521M24.8	antisense	470	0.127826	2.22208	2.5951	0.000328945	0.00375906
CTD-2313J17.6	lincRNA	607	0.0303733	1.17037	2.59486	8.10708e-05	0.00159779
LINC01913	lincRNA	2215	0.0080225	0.331833	2.59311	0.000122649	0.00207372
RP11-862G15.1	lincRNA	2072	0	0.37223	2.59264	0.000450872	0.00446472
SPTB	protein_coding	14772	2.48433	7.04572	2.59261	0.0149999	0.0391224
ALAS2	protein_coding	2134	1.72863	10.7248	2.59128	0.0290947	0.0649591
TEK	protein_coding	4805	2.26322	6.00644	2.59122	0.0115526	0.0322954
PLK5	protein_coding	2353	0.00428256	0.705323	2.59025	0.000364105	0.00402006
KRT15	protein_coding	7069	0.00398145	0.210684	2.59011	0.00145056	0.00769024
RP11-620J15.2	lincRNA	3843	0.0143191	0.300283	2.58969	0.00165775	0.00826927
ADAM33	protein_coding	5834	0.0529908	0.463444	2.58954	0.00601854	0.0201022
C10orf128	protein_coding	4123	0.301579	1.48684	2.58911	0.00450682	0.0162254
PPP1R36	protein_coding	3093	0.0234139	0.408907	2.5874	0.000281548	0.00341034
PLPP1	protein_coding	2016	0.756235	1.74333	2.58673	0.00261302	0.0111642
JPH3	protein_coding	5941	0.0125061	0.239368	2.58607	0.000367073	0.00403701
HOXD10	protein_coding	2692	0	0.348304	2.58602	0.000341034	0.00386027
PCDHB1	protein_coding	8210	0.00167836	0.0741896	2.58579	0.000186958	0.00264549
ITIH1	protein_coding	4544	0.0107115	0.259867	2.58438	0.000201448	0.00275729
NTN4	protein_coding	4166	0.0349788	0.495877	2.58361	0.0030539	0.0123924
PTPN3	protein_coding	9995	0.00372027	0.0795656	2.58303	7.98738e-05	0.00158642
AC005537.2	lincRNA	4520	0.0193893	0.222234	2.58262	0.000478758	0.00454399
PRKCA	protein_coding	11152	0.920686	3.98807	2.58254	7.75892e-07	6.71233e-05
ARHGEF16	protein_coding	5563	0.0796644	0.686121	2.58023	0.00598275	0.0200312
PDE4A	protein_coding	6646	0.254733	1.55264	2.57927	1.27915e-05	0.000475062
PLCE1	protein_coding	12930	0.0609703	0.351914	2.57919	0.000632936	0.00528667
FOXP2	protein_coding	16152	0.052367	0.133422	2.57914	0.00702496	0.0225613
LILRA5	protein_coding	1760	0.448014	2.92617	2.57844	0.0316804	0.0693611
TMEM51	protein_coding	2240	0.74579	3.45681	2.57809	0.000848067	0.00631903
LINC01857	lincRNA	492	0	1.94886	2.57805	0.000461848	0.0044851
FNDC4	protein_coding	1982	0.0378291	0.419203	2.57757	0.000153947	0.00236107
LINC01224	lincRNA	3296	0.0187123	0.374443	2.57434	0.000648222	0.00535638
GNGT2	protein_coding	1689	0.386125	1.56923	2.57422	0.00938241	0.027675
GPR78	protein_coding	8362	0.0128844	0.108288	2.57333	0.00277826	0.0116861
STC2	protein_coding	6128	0.0208669	0.240751	2.57296	0.000469331	0.00451481
USHBP1	protein_coding	5175	0.104688	0.706031	2.57215	0.00125292	0.0071876
NOS1AP	protein_coding	7771	0.155891	0.612773	2.57204	0.00745332	0.0234634
DLX3	protein_coding	2715	0	0.26996	2.57141	0.000147311	0.00230311
FUT9	protein_coding	13719	0.0122119	0.231811	2.57057	0.0027341	0.0115384
SLC22A8	protein_coding	8531	0.0188516	0.248061	2.56896	0.0021257	0.00967276
RP11-6D1.3	antisense	412	0	1.34052	2.5682	6.10627e-06	0.000274767
F3	protein_coding	2875	0.400577	3.10852	2.56794	0.0022205	0.00999161
CTA-243E7.1	antisense	13120	0.00763667	0.195477	2.56771	0.00140352	0.0075507
RGS9	protein_coding	6990	0.0686099	0.369613	2.56502	0.00258556	0.0110883
CHIT1	protein_coding	7730	0.0434307	0.231049	2.56408	0.00160218	0.00809165
RASL10A	protein_coding	2240	0.465523	3.31712	2.56357	0.00289399	0.0120002
RP3-467K16.4	lincRNA	5178	0.251353	1.12303	2.56323	0.00347874	0.0135422
LGI1	protein_coding	11108	0.00812399	0.220918	2.5627	0.00361142	0.0138771
PAX8	protein_coding	7400	0.193255	0.476899	2.56187	0.00246019	0.0106971
FAIM2	protein_coding	6057	0.00667661	0.17948	2.56153	0.00110178	0.00715683
RP11-560A15.4	lincRNA	377	0	2.30203	2.56067	0.00179627	0.00870934
EVX1	protein_coding	3353	0.00262458	0.144857	2.55998	4.97669e-05	0.00117459
APOBEC3A	protein_coding	2358	0.109216	0.561397	2.5594	0.00109632	0.00715683
AC110781.3	antisense	4764	0.0172802	0.220864	2.55913	0.000457812	0.0044713
MUC5B	protein_coding	18598	0.0261576	0.121329	2.55887	0.00441927	0.0160333
RP11-1299A16.3	antisense	5647	0.0678507	0.460559	2.55884	0.0024458	0.0106556
EXTL1	protein_coding	4537	0	0.0958027	2.55857	1.77787e-05	0.000584814
RP11-314P15.2	lincRNA	529	0	4.08002	2.55851	0.00193895	0.00911052
LARP6	protein_coding	5554	0.0143433	0.178726	2.5576	8.44581e-05	0.00164137
TUBB2B	protein_coding	2194	0.00401104	0.347337	2.55692	5.70262e-05	0.00128266
TNS4	protein_coding	4847	0.00994824	0.239253	2.55573	0.00113264	0.00715683
PDE1C	protein_coding	13821	0.0221186	0.211997	2.55402	0.00444541	0.0160854
LTBP1	protein_coding	7329	10.2205	22.0738	2.55285	0.0401728	0.0833816
SH3BP5	protein_coding	4159	2.80809	8.62188	2.55271	0.000249424	0.00316741
PAQR9	protein_coding	4169	0.0378064	0.402544	2.55242	0.00233005	0.0103436
LPL	protein_coding	4382	0.0463087	0.874786	2.55232	0.00783327	0.0242664
TREH	protein_coding	3179	0.00367055	0.382134	2.55131	0.000204199	0.00277563
HK3	protein_coding	3290	0.14886	3.96662	2.55121	0.0199649	0.0486618
ASPA	protein_coding	5854	0	0.0855947	2.54917	6.37337e-05	0.00137437
ITIH6	protein_coding	5497	0.00918561	0.21186	2.54846	0.000161452	0.00242779
GRM8	protein_coding	6457	0.0425994	0.249399	2.54801	0.00319056	0.0127678
LINC01204	lincRNA	5260	0.00324717	0.211057	2.54788	0.000505281	0.00467854
GSDMC	protein_coding	2934	0.0114407	0.437837	2.54784	0.00214991	0.00974968
AKR1C4	protein_coding	1914	0	0.34468	2.5474	2.44866e-05	0.000732671
RP11-626G11.5	antisense	696	0.120457	1.36566	2.54632	0.000239649	0.00308304
PLEKHH1	protein_coding	10817	0.0610667	0.289108	2.54608	0.00166858	0.00827845
HSD17B2	protein_coding	9550	0.0197526	0.145535	2.54594	0.000976761	0.00690752
TMEM26-AS1	antisense	863	0	0.56666	2.54587	0.000107433	0.00190168
RP11-280G9.1	lincRNA	2750	0.0200327	0.406026	2.54583	0.000486085	0.00458156
ATP6V0A4	protein_coding	4034	0.0360521	0.327517	2.54404	0.00155278	0.00795063
GIPR	protein_coding	4736	0.0186077	0.206433	2.54385	0.000315249	0.00366529
SLC9A2	protein_coding	5984	0.0213109	0.304155	2.54364	0.00295553	0.0121881
RAMP2-AS1	lincRNA	4168	0.20593	0.379094	2.54307	0.00604231	0.0201537
MRC1L1	protein_coding	5261	0.0218563	0.174348	2.54297	0.000190129	0.00266883
RP5-1120P11.1	antisense	2296	0.0342091	0.614328	2.54293	0.00149798	0.00780698
CACNG8	protein_coding	8747	0.0343411	0.442986	2.54243	0.00409126	0.0151048
SCNN1G	protein_coding	3507	0	0.117671	2.5421	4.10055e-05	0.00103206
TEX15	protein_coding	11663	0.0475017	0.328787	2.54188	0.00528368	0.0183074
SEMA5B	protein_coding	6224	0.202734	0.826223	2.54164	0.0161309	0.0413833
MMP3	protein_coding	2048	0	0.237391	2.54146	0.000472526	0.00452229
AKR1B10	protein_coding	1744	0	0.303347	2.54082	0.000270675	0.00333387
NCKAP1	protein_coding	22520	0.18141	0.816651	2.5401	0.00713273	0.0228267
RP1-166H4.2	lincRNA	1513	0	0.325621	2.53984	0.000348074	0.0039098
IGDCC3	protein_coding	5552	0.0167923	0.355786	2.53917	0.000828046	0.0062151
ELL3	protein_coding	2880	0.0304076	0.526927	2.53873	0.00111161	0.00715683
LINC01648	lincRNA	1519	0	0.282562	2.53739	0.000233793	0.00303545
RP1-81P11.1	lincRNA	368	0.225406	3.27539	2.537	0.0078413	0.0242845
CRTAC1	protein_coding	3553	0.0189874	0.307554	2.53589	0.00156744	0.00799103
RP11-138I1.2	antisense	2166	0.181934	1.49519	2.53574	0.000958969	0.0068437
ADGB	protein_coding	7773	0.0479097	0.190422	2.53485	0.0012374	0.00715683
TRPM6	protein_coding	9193	0.0764466	0.268688	2.5331	0.00247783	0.0107631
TRIM72	protein_coding	8500	0.11391	0.681891	2.53294	0.00534463	0.0184655
LY6K	protein_coding	4049	0.0201318	0.289193	2.53287	0.000705171	0.00562374
RP11-196E1.3	antisense	4476	0.0057239	0.233493	2.5328	0.0012479	0.0071876
AC005009.2	antisense	924	0.0630424	0.785141	2.53248	5.39692e-05	0.00123846
CDC42EP5	protein_coding	903	0.152778	1.04077	2.53228	0.00212937	0.00968083
RP1-261G23.7	antisense	188	0.0836062	2.0522	2.53217	2.08027e-06	0.000130495
ADAMTS20	protein_coding	7242	0.00117924	0.122514	2.53198	9.50776e-05	0.00175659
RP11-762H8.1	antisense	449	0.137459	4.44917	2.5311	0.00160402	0.00809165
EDA	protein_coding	6999	0.0765053	0.582217	2.53096	0.00604301	0.0201539
F8	protein_coding	9609	0.382472	2.6007	2.53053	0.00101981	0.00708471
HRG	protein_coding	5061	0.0444907	0.229262	2.52906	0.000912501	0.00663492
RAX2	protein_coding	2414	0.00217039	0.226426	2.52842	2.41364e-05	0.00072447
ADH1A	protein_coding	2258	0	0.330955	2.52753	3.77291e-05	0.000971904
CTC-548K16.5	antisense	252	0.0908264	2.71647	2.52642	5.91833e-05	0.00131878
CDR1-AS	antisense	1485	0.903463	5.34736	2.52468	0.00890222	0.0266372
RP11-87M18.2	antisense	1861	0	0.479089	2.52453	0.000777185	0.00599152
SLC12A8	protein_coding	5586	0.0127819	0.18589	2.5235	0.000410798	0.00427109
VIPR1-AS1	antisense	5197	0.0229195	0.296384	2.52342	0.00151227	0.00781926
FOXF1	protein_coding	3516	0.0446837	0.298173	2.52154	0.000552195	0.00489624
ZIC4	protein_coding	8568	0.00369507	0.106303	2.52129	0.000678252	0.00550044
MYT1L	protein_coding	13081	0.0185808	0.156222	2.52035	0.000924813	0.00668964
LA16c-313D11.9	antisense	1274	0	0.605031	2.51925	0.000323419	0.00372223
ERBB3	protein_coding	8658	0.0348141	0.229317	2.51914	0.00220266	0.0099288
SLC28A1	protein_coding	3445	0	0.181407	2.51906	1.76118e-05	0.000583716
EYA2	protein_coding	3618	0.0326423	0.419827	2.51864	0.00233726	0.0103621
ARG1	protein_coding	1965	0.190613	1.69022	2.51797	0.01397	0.0371457
LEMD1-AS1	antisense	2781	0.0086627	0.359196	2.51607	0.000158957	0.00240634
ANK2	protein_coding	18224	0.0482856	0.292492	2.51592	0.00165183	0.00824869
SCN5A	protein_coding	10017	0.0441123	0.150152	2.51505	0.000409022	0.00426611
MAPK10	protein_coding	17876	0.0264592	0.218532	2.51463	0.0015987	0.00808592
IRS1	protein_coding	9953	0.22368	0.942218	2.51453	0.0012712	0.00719115
LRP1B	protein_coding	17040	0.0420085	0.267214	2.51396	0.00791625	0.0244642
RP11-325N19.3	lincRNA	4839	0.0338788	0.50403	2.51373	0.00411268	0.0151601
RP11-1151B14.3	lincRNA	4521	0.00213147	0.221261	2.51264	0.000146382	0.00229796
GPR149	protein_coding	2323	0.0397811	0.45947	2.51258	0.00152325	0.00785307
SEZ6	protein_coding	5115	0.0393683	0.261965	2.51168	0.000365342	0.00402358
BTBD19	protein_coding	3520	1.90526	10.4432	2.51128	2.55099e-05	0.000749575
ELAVL3	protein_coding	4761	0.0448158	0.528484	2.51113	0.00636699	0.0209724
ST6GALNAC3	protein_coding	7237	0.184119	0.745369	2.51086	0.00226696	0.0101353
RP11-342D11.2	antisense	781	0.125406	1.41394	2.51055	0.000881022	0.00649212
ALOXE3	protein_coding	3760	0.011648	0.232958	2.51033	0.000126773	0.00210871
KCNAB1	protein_coding	6852	0.0126926	0.395116	2.5098	0.00216376	0.00979513
GDF2	protein_coding	1955	0.0500582	1.10487	2.50842	0.00185032	0.00884571
CTD-3138F19.1	lincRNA	576	0	0.922106	2.50697	0.000387592	0.00414385
KRT82	protein_coding	2664	0.0609088	0.252125	2.50609	0.00215528	0.00976828
LMCD1	protein_coding	9130	0.104561	0.287808	2.5036	0.00214955	0.00974948
LINC01583	lincRNA	2568	0	0.260533	2.50274	0.000231871	0.003022
ZNF423	protein_coding	8997	0.641213	1.57664	2.50193	0.00332494	0.0131279
RP11-114H23.1	lincRNA	1385	0	0.395386	2.50108	0.000506531	0.00468394
TRDN	protein_coding	6700	0.00668432	0.330542	2.50017	0.000707465	0.00563513
GPNMB	protein_coding	5956	0.133417	1.0767	2.50017	0.0174007	0.0438674
IGSF1	protein_coding	7051	0.0405371	0.184905	2.49991	0.0021562	0.00976904
FGG	protein_coding	3600	0.020716	0.278253	2.49985	0.000881765	0.00649603
SPIRE2	protein_coding	7975	0.137392	0.518159	2.49811	0.000687552	0.0055412
FPR1	protein_coding	2594	0.0754587	1.12913	2.4971	0.00618633	0.0205182
CD1B	protein_coding	1395	0	0.940633	2.49632	0.000423088	0.00432049
DHRS2	protein_coding	7556	0.00897665	0.236637	2.49546	0.00336824	0.0132443
RP1-60O19.1	lincRNA	6610	0.00855698	0.166408	2.4954	0.000458406	0.0044742
PF4V1	protein_coding	522	0.0252403	1.90471	2.49515	0.00041926	0.0043015
AC023137.2	lincRNA	308	0.031287	3.10784	2.49404	0.000100911	0.00182759
RTP5	protein_coding	2606	0.0826392	1.42935	2.49398	0.0157197	0.0405417
DHRS9	protein_coding	3750	0.567103	3.09576	2.49364	0.000950685	0.00680778
ZIC2	protein_coding	3310	0.0205774	0.255796	2.49328	0.000225923	0.00296715
PTPN21	protein_coding	7396	0.0749863	0.33056	2.49313	0.00184643	0.00883535
AC005162.5	antisense	578	0	1.12985	2.49293	0.000288395	0.00347137
SLC26A9	protein_coding	5628	0.0402577	0.348054	2.49261	0.00371703	0.0141712
LINC00608	antisense	4023	0	0.303493	2.49243	0.00193022	0.00907923
KCNE1	protein_coding	5713	0.0757351	0.479297	2.49138	0.004539	0.0163087
MB	protein_coding	2168	0.00538223	0.394918	2.49051	0.00110544	0.00715683
LINC01315	lincRNA	1267	0.00415048	1.0144	2.49034	0.000630816	0.00527467
HTR1A	protein_coding	1819	0.00289096	0.454455	2.49033	0.000532972	0.00481478
LHX9	protein_coding	10442	0.00200702	0.0607488	2.49003	6.4568e-05	0.00138645
AC008697.1	antisense	8467	0.0578221	0.285175	2.48975	0.00399947	0.0148782
CFAP100	protein_coding	3352	0	0.349752	2.48925	0.000260385	0.00325678
LINC00298	lincRNA	2610	0	0.340873	2.48897	0.000151767	0.00234297
MOG	protein_coding	3196	0.0148285	0.397304	2.48832	0.00291266	0.0120567
NCAN	protein_coding	6905	0.00304719	0.162202	2.48797	0.000187362	0.00264878
C1QTNF9B	protein_coding	2196	0	0.407413	2.48744	0.000763693	0.00592021
AC008067.2	antisense	3357	0.0203181	0.214514	2.48662	0.000427833	0.00434519
RP11-312B8.1	antisense	415	1.92037	7.39675	2.48634	0.000128775	0.0021259
RP5-984P4.6	lincRNA	3674	0	0.230947	2.4862	6.11973e-05	0.00134319
GADD45B	protein_coding	2138	11.059	91.8127	2.48603	0.00434463	0.0158421
ANXA3	protein_coding	5123	0.263083	0.891686	2.48497	0.00205784	0.00947707
OTOP3	protein_coding	2516	0.0033943	0.217878	2.48438	0.000189303	0.0026664
C12orf56	protein_coding	5504	0.00937886	0.163907	2.48394	0.000200068	0.00275053
DCHS2	protein_coding	16281	0.0397745	0.144543	2.48268	0.00234518	0.0103897
MOBP	protein_coding	9237	0.0157438	0.162973	2.48176	0.00257721	0.0110648
GJC1	protein_coding	8660	0.184835	0.890276	2.48157	0.00664706	0.0216741
GLYAT	protein_coding	3114	0	0.361482	2.48146	0.000347656	0.00390812
LINC00906	lincRNA	4183	0	0.131961	2.48094	0.00054384	0.00485061
IL12B	protein_coding	2761	0.00189762	0.175764	2.48011	0.000211221	0.00283919
F10	protein_coding	2356	0.0108744	0.242966	2.48007	0.000582991	0.00501718
SCIMP	protein_coding	4208	0.281507	2.25858	2.47811	0.0346129	0.0742195
SLC8A2	protein_coding	5546	0.192129	0.854871	2.47783	0.0120141	0.0332226
C22orf42	protein_coding	2055	0.0176419	0.332992	2.47695	0.000702482	0.00561437
AC068499.10	antisense	1212	0.0833807	0.669518	2.47581	0.000407577	0.00425682
MUC12	protein_coding	17130	0.0533331	0.364542	2.47545	0.00183079	0.00877969
KLF2	protein_coding	2018	38.0793	131.558	2.4751	0.000194933	0.00270397
MRO	protein_coding	5525	0.0447933	0.309751	2.47475	0.00422018	0.0154828
RIN1	protein_coding	5469	0.22991	1.13735	2.47419	2.01654e-05	0.000640735
BOLL	protein_coding	4004	0.0158994	0.332658	2.47417	0.00192353	0.00907001
COL21A1	protein_coding	7078	0.0100934	0.195454	2.47327	0.00124609	0.00718029
CYP39A1	protein_coding	3111	0.0101048	0.318897	2.47325	0.000854343	0.00634885
MYH13	protein_coding	6120	0.033844	0.375475	2.46922	0.00186431	0.00888077
PODN	protein_coding	4900	0.0241559	0.276283	2.46909	0.000946996	0.00679348
RP11-1020M18.10	antisense	629	0	1.01546	2.46903	0.000670098	0.00546256
S1PR3	protein_coding	8754	0.136463	0.825444	2.46768	0.00157566	0.00802225
GRHL3	protein_coding	3940	0.0407304	0.433351	2.46692	0.00192409	0.00907126
TMEM200C	protein_coding	10638	0.00638472	0.109954	2.46652	0.000452329	0.0044697
LINC01841	lincRNA	1016	0.178766	1.15304	2.46634	0.000718667	0.00569041
KIRREL	protein_coding	7872	0.458166	1.34501	2.46555	0.000168158	0.00248722
KIAA2012	protein_coding	7943	0.0208417	0.250123	2.46546	0.00252633	0.010912
JMJD1C-AS1	antisense	1335	0.109578	0.722368	2.46503	0.000195015	0.00270397
BARX1	protein_coding	1777	0	0.200897	2.46455	3.63075e-05	0.000948504
NDST3	protein_coding	7009	0.0387086	0.340929	2.46372	0.00682146	0.0220833
MUC22	protein_coding	6019	0.0128889	0.266515	2.46371	0.00160329	0.00809165
IFI30	protein_coding	2481	0.318303	2.0326	2.46344	0.0134078	0.0359845
RP4-791M13.5	antisense	406	0.0408617	2.03074	2.4633	0.00142881	0.00763278
MOGAT2	protein_coding	4139	0.00825326	0.250614	2.46312	0.00116412	0.00715683
GIMAP8	protein_coding	4184	0.749425	4.76169	2.46269	0.0240429	0.0560436
WI2-85898F10.1	lincRNA	805	0	0.722579	2.46235	0.00102312	0.00709481
THEGL	protein_coding	1793	0.0834298	0.816945	2.46233	0.00142604	0.00762855
KNDC1	protein_coding	7985	0.00849584	0.123765	2.462	0.000552738	0.00489818
SLC22A31	protein_coding	2610	0.0509721	0.729165	2.46179	0.00754635	0.0236761
RP11-700H6.1	lincRNA	2054	0.010017	0.80611	2.46158	0.000567445	0.00495191
FGF23	protein_coding	3018	0.0131728	0.406321	2.46125	0.00073941	0.00579889
BCHE	protein_coding	3082	0.00429976	0.312907	2.46078	0.000101137	0.00182759
TMPRSS15	protein_coding	4233	0.00860266	0.22074	2.46011	0.000404771	0.00424687
AIM1L	protein_coding	6051	0.00563157	0.136185	2.45978	0.000280964	0.00340952
GPR158-AS1	antisense	2433	0.0134805	0.342374	2.45955	0.000756342	0.00587509
DIP2C	protein_coding	8563	0.179823	0.654729	2.4593	0.00078997	0.00604326
KIAA1456	protein_coding	14668	0.104113	0.345154	2.45853	0.00135406	0.0073785
SNCG	protein_coding	1247	0	0.382993	2.45806	3.68114e-06	0.000194753
LHCGR	protein_coding	4999	0.0095056	0.156927	2.4578	0.000548846	0.00488064
SSTR1	protein_coding	4295	0.0316733	0.20887	2.45733	0.0051197	0.0178989
HS3ST1	protein_coding	8166	0.60986	0.769801	2.45676	0.0343927	0.0738609
GPR3	protein_coding	2115	0.245581	0.923739	2.4566	0.000722125	0.00570308
ZYG11A	protein_coding	4694	0.0086153	0.217936	2.45619	0.00142542	0.00762686
HSPB9	protein_coding	1922	0.0202841	0.372764	2.45596	0.000323735	0.00372326
S100A7A	protein_coding	4457	0.0325737	0.187344	2.45524	0.00313816	0.0126385
RP11-98F14.12	antisense	2238	0.051759	0.446664	2.45407	0.000421749	0.00431503
SPR	protein_coding	1480	0.26799	1.82543	2.45401	0.00247213	0.0107414
MYO10	protein_coding	13963	0.528634	2.33558	2.45347	0.00093449	0.00673514
NR2E3	protein_coding	3244	0.00323016	0.182856	2.45277	0.000587523	0.00503221
HS6ST2	protein_coding	5002	0.00729805	0.151084	2.45081	0.000258675	0.00325215
PPP1R3C	protein_coding	2524	0.0915188	0.69818	2.4507	0.00526515	0.0182659
TPH2	protein_coding	6929	0.0259179	0.178353	2.44841	0.00182399	0.00875825
KIAA1210	protein_coding	7824	0.00303799	0.0819749	2.44809	0.000137494	0.00220897
AC104695.4	lincRNA	849	0	1.11546	2.44776	0.00210259	0.00960889
SH3PXD2A-AS1	antisense	2217	0	0.32921	2.44766	0.000164881	0.00245412
ACTL8	protein_coding	1864	0.0269303	0.660013	2.44665	0.000394892	0.00418641
F7	protein_coding	3795	0.0882057	0.739809	2.44649	0.00501799	0.0176235
SULT6B1	protein_coding	1325	0.0039688	0.416171	2.44614	3.68053e-05	0.00095532
LINC01952	antisense	362	1.01054	5.22765	2.44549	0.000834615	0.00624499
IP6K3	protein_coding	2785	0.0398638	0.379331	2.44487	0.00590849	0.0198302
RP11-383J24.1	lincRNA	553	0	0.973864	2.44483	0.000378536	0.00409994
LINC02174	lincRNA	553	0.0435641	1.90495	2.4448	0.00122306	0.00715683
RP3-467K16.2	antisense	3105	0	0.148208	2.44467	5.16682e-05	0.00120009
DCAF12L1	protein_coding	3382	0	0.358994	2.44442	0.000112758	0.00195458
TDO2	protein_coding	5264	0.00693481	0.259729	2.44422	0.00481403	0.0170771
HAGLR	antisense	4851	0.00853615	0.268448	2.44414	0.00115278	0.00715683
S100A5	protein_coding	784	0.0368739	0.646817	2.44375	0.000231259	0.00301787
NWD2	protein_coding	8325	0.0129825	0.202777	2.44364	0.0032081	0.0128182
RP11-227H15.4	antisense	1933	0.0135623	0.442215	2.44348	0.00179831	0.00871252
RPL3L	protein_coding	2758	0.0651954	1.03663	2.44324	0.00984202	0.028678
RP11-17A4.4	lincRNA	584	0.0146234	1.68841	2.44179	0.000619652	0.0052086
AIM2	protein_coding	2009	0.0228156	0.37268	2.44139	0.000629999	0.00526962
HNMT	protein_coding	4756	0.777118	2.0752	2.44119	0.0205698	0.0497724
CTC-529P8.1	lincRNA	4313	0.0252739	0.259859	2.44047	0.000663775	0.00543372
CSPG4	protein_coding	8290	0.112147	0.511916	2.43871	0.0205578	0.0497555
LIMS2	protein_coding	8487	0.0997457	0.487866	2.43845	0.000376237	0.00408947
RPH3A	protein_coding	10369	0.0268934	0.129703	2.438	0.00258132	0.0110803
UPP1	protein_coding	4577	0.560475	3.43514	2.43792	0.00366524	0.0140313
RP5-1121A15.3	lincRNA	531	0.0497188	2.47699	2.43752	0.00379145	0.0143681
RP1-149C7.1	lincRNA	987	0	0.658745	2.43729	0.000172792	0.00251896
RAX	protein_coding	3725	0	0.148649	2.43543	0.000149094	0.0023145
MYPN	protein_coding	7060	0.0147334	0.235608	2.43525	0.00373852	0.0142337
CD70	protein_coding	1532	0.106702	0.802385	2.43451	0.00251172	0.0108669
RP11-705O1.8	lincRNA	2131	1.12926	5.80263	2.43224	0.000345426	0.00389624
MUC5AC	protein_coding	5930	0.0175894	0.217034	2.43217	0.00286653	0.0119365
SKIDA1	protein_coding	6700	0.369646	1.51979	2.43162	0.00038359	0.00412125
CPAMD8	protein_coding	10199	0.0632255	0.378386	2.43043	0.000377088	0.00409147
IGFL2-AS1	lincRNA	1751	0.00975449	0.84381	2.43035	0.000817407	0.0061698
GABRG3	protein_coding	12595	0.00536975	0.0851846	2.43027	0.00158496	0.00804694
HCN2	protein_coding	3408	0.101632	0.481851	2.42947	0.00479334	0.0170096
RP11-497E19.1	lincRNA	2448	0	0.203139	2.42907	0.000472194	0.00452229
PLEK2	protein_coding	1603	0.0644539	0.593154	2.42874	0.00197179	0.00922375
BEAN1	protein_coding	7379	0.0193033	0.287006	2.42857	0.00390104	0.0146365
TMEM132B	protein_coding	15703	0.00992913	0.100924	2.42845	0.00119294	0.00715683
CTA-212A2.3	lincRNA	14574	0.00562708	0.226627	2.42824	0.00972744	0.0284263
SHC3	protein_coding	9929	0.011426	0.128671	2.42802	0.00244452	0.010653
GC	protein_coding	2381	0.0502096	0.577577	2.42745	0.00288417	0.0119713
LINC01102	lincRNA	5098	0	0.275744	2.42687	0.00124547	0.00717916
MFSD2A	protein_coding	4007	0.885994	3.38394	2.42646	0.000274586	0.00336047
SLC7A8	protein_coding	5991	1.43209	10.2613	2.42604	0.00404282	0.0149782
LRRC4B	protein_coding	3121	0.0127266	0.265983	2.42492	6.06034e-05	0.00133973
DPP10-AS1	antisense	995	0.0923615	0.656809	2.42465	0.000202025	0.00276004
SCN7A	protein_coding	8196	0.0198425	0.175254	2.42374	0.00101523	0.00706248
RP11-201E8.1	lincRNA	2305	0	0.18337	2.42349	0.000415764	0.00428405
EPHA4	protein_coding	7554	0.178554	1.15721	2.42333	0.00209317	0.00957579
RP11-470P21.2	antisense	442	0.173893	3.38559	2.42302	0.00344516	0.0134606
RP11-290L1.2	antisense	779	0.322133	3.32044	2.42241	0.0139761	0.0371457
FBLN2	protein_coding	4812	3.22549	13.9647	2.42238	6.31341e-09	2.50608e-06
RGR	protein_coding	4256	0	0.167717	2.4217	0.000579336	0.00500318
PWRN4	lincRNA	420	0.244002	2.77316	2.42065	0.00725507	0.0230728
RP11-1151B14.4	antisense	2553	0.148446	0.961231	2.42016	0.0129016	0.0350053
SLC25A18	protein_coding	4741	0.0414837	0.146519	2.41869	0.00704405	0.0226092
KCTD16	protein_coding	14294	0.00330635	0.0563231	2.41798	0.000161747	0.00243058
RP5-1028L10.1	antisense	997	0.00986329	0.860702	2.4175	0.00306685	0.0124269
SCG3	protein_coding	3315	0.0178377	0.195491	2.41743	4.76459e-05	0.00113873
FGF14	protein_coding	13759	0.00865578	0.185999	2.41588	0.00867986	0.0261452
GLIS1	protein_coding	3113	0.0233296	0.352062	2.4147	0.0054523	0.0186872
RP11-1008C21.1	lincRNA	2448	0.00324189	0.209157	2.41414	4.06042e-05	0.00102379
LINC00877	lincRNA	4878	0.705728	2.62468	2.41408	0.0119909	0.0331825
ITIH2	protein_coding	3378	0.0569663	0.54307	2.41381	0.00485594	0.017196
CCDC83	protein_coding	2359	0.0169306	0.424126	2.41305	0.000967761	0.00687236
PRR19	protein_coding	2575	0.129007	0.370274	2.41252	0.000645644	0.00533938
CLEC1A	protein_coding	3169	0.0209623	0.492376	2.41225	0.00103132	0.00713236
AC013275.2	antisense	2089	0.00755194	0.39878	2.41212	0.00225239	0.0100804
CTD-2313J23.1	lincRNA	6510	0	0.0667043	2.41197	3.15276e-06	0.000175696
CTA-373H7.7	lincRNA	2613	0.0612098	0.490304	2.41168	0.000979303	0.00691413
SLC17A7	protein_coding	6013	0.018779	0.137595	2.41149	0.000275296	0.00336451
DCDC2C	protein_coding	2242	0.040387	0.542689	2.41142	0.00309893	0.0125254
RCN3	protein_coding	2093	1.80017	9.95214	2.41083	0.000415087	0.00428282
SDR42E2	protein_coding	2630	0.0279729	0.475512	2.40968	0.00166079	0.00827729
RP11-196G18.3	antisense	3543	0.00834736	0.251745	2.40954	0.000233021	0.00303215
C8A	protein_coding	2356	0	0.259359	2.40948	8.50311e-05	0.00164319
RP11-4B16.4	antisense	3125	0.133444	1.09862	2.40899	0.0104852	0.0300305
GLIS3	protein_coding	11558	0.0266398	0.237613	2.40791	0.00458484	0.0164484
MYBPHL	protein_coding	1789	0.0224703	0.469722	2.40788	0.00117151	0.00715683
CDH18	protein_coding	4853	0.0434426	0.410873	2.40785	0.00386744	0.0145468
CTD-2616J11.16	antisense	438	0.0869163	2.1487	2.40746	0.000469644	0.00451499
CREB3L1	protein_coding	4037	0.205078	1.26661	2.40647	0.00912381	0.0271206
LINC00635	lincRNA	4547	0	0.13327	2.40635	0.00114745	0.00715683
GYPB	protein_coding	1566	0.679025	1.64238	2.4061	0.01211	0.0334191
CTC-591M7.1	lincRNA	5701	0.0143642	0.116302	2.40607	0.000473054	0.00452229
POTEJ	protein_coding	3383	0.00284847	0.0962031	2.40599	0.000132318	0.00215896
SYT16	protein_coding	15234	0.0172416	0.140919	2.40523	0.00834156	0.0253885
AC007740.1	antisense	2999	0.0484098	0.34614	2.40486	0.00661854	0.0216085
AC007040.11	protein_coding	4451	0.00865997	0.163474	2.40461	0.00160739	0.00809545
RP11-45M22.5	lincRNA	686	0.914456	3.49478	2.40417	0.000673492	0.0054818
RP4-625H18.2	antisense	5471	0.0477768	0.288801	2.40374	0.00566587	0.0192154
FGF11	protein_coding	5565	0.0681495	0.38922	2.40331	0.00239288	0.0105248
RP11-540E16.2	lincRNA	401	0	1.96419	2.40305	0.00211965	0.00965095
MUC3A	protein_coding	5533	0.0633909	0.334729	2.40281	0.00844044	0.025638
PLPPR1	protein_coding	3669	0	0.15791	2.40277	1.51598e-05	0.000533299
KCNQ2	protein_coding	12775	0.0273375	0.1906	2.40258	0.00861614	0.0260298
DSG4	protein_coding	4696	0.00307806	0.259412	2.40256	0.00169544	0.00836847
SBK3	protein_coding	1519	0.00562216	0.855217	2.40254	0.00192679	0.00907284
HMCN2	protein_coding	12366	0.0121913	0.0556551	2.40221	0.000406529	0.00425167
RP11-717H13.1	lincRNA	4949	0.00105866	0.235228	2.40124	0.000794311	0.00606103
ADH6	protein_coding	4401	0.00388096	0.238304	2.3993	0.000419831	0.0043015
SIX1	protein_coding	5430	0.0254066	0.339366	2.39916	0.00488229	0.0172694
KCNJ2	protein_coding	5577	0.325808	1.06548	2.39839	0.0091526	0.0271799
RP11-1336O20.2	antisense	2209	0.0223889	0.291027	2.39789	0.00240085	0.0105391
GAP43	protein_coding	2087	0.00865839	0.359448	2.39787	0.00010192	0.00183692
ABC14-1188822O7.1	antisense	1565	0.0381983	0.35174	2.39622	0.000251787	0.00318801
SPATA31E1	protein_coding	4478	0.002196	0.105715	2.3955	0.000720986	0.00569995
ESM1	protein_coding	2695	0	0.112642	2.39531	3.94144e-05	0.0010027
SHISA6	protein_coding	8527	0.0118883	0.25339	2.39496	0.00620764	0.0205689
IGSF9B	protein_coding	5753	0.0696492	0.460091	2.3948	0.000200265	0.00275053
TFAP2A	protein_coding	8245	0.0149289	0.109158	2.39478	0.000585229	0.00502707
IGF2BP3	protein_coding	8511	2.73098	9.77391	2.39473	2.66364e-07	3.31133e-05
INPP5J	protein_coding	4822	0.189125	0.636381	2.39466	0.000273883	0.00335576
HOXA13	protein_coding	5086	0.0290664	0.256748	2.39434	0.00265455	0.0113005
RP5-947P14.1	lincRNA	8646	0.00506553	0.124375	2.39379	0.00143589	0.00764134
ASTN1	protein_coding	9201	0.0570768	0.202915	2.39209	0.0155408	0.0401883
KCNH1	protein_coding	9812	0.00632213	0.174142	2.39204	0.00268451	0.0113917
SYBU	protein_coding	7024	0.0133742	0.0957653	2.39196	0.0028564	0.0119104
LINC01483	lincRNA	4173	0.0346656	0.228999	2.3916	0.000873431	0.00644392
LINC01940	lincRNA	3489	0	0.249741	2.39133	0.000406396	0.00425167
RP11-122M14.1	antisense	2452	0.0149976	0.358851	2.39078	0.00017111	0.00250519
C4orf47	protein_coding	1366	0.141685	1.30248	2.39014	0.00185824	0.00886389
ERFE	protein_coding	3572	0.137109	0.596587	2.38959	0.00753276	0.023648
TEAD3	protein_coding	3046	0.0679541	0.602579	2.38945	0.00548943	0.0187787
RP11-257I14.1	antisense	2300	0.0928267	0.500976	2.38923	0.00323312	0.012888
RP11-26J3.1	lincRNA	2455	0.00695728	0.250625	2.38889	0.000299178	0.00353618
KRT40	protein_coding	2225	0.0118172	0.300379	2.38872	0.00132815	0.00732571
CHDH	protein_coding	7758	0.020157	0.207335	2.38704	0.00241674	0.0105891
SLC1A1	protein_coding	3998	0.0063507	0.190272	2.38627	0.00025342	0.00320227
AC079305.10	antisense	499	1.28886	8.91523	2.38605	0.00492042	0.0173742
LRRN4	protein_coding	2692	0.0130037	0.349562	2.38458	0.000727258	0.00572447
TGM5	protein_coding	3631	0.0334367	0.433549	2.38356	0.00580173	0.0195503
SERPINB3	protein_coding	1777	0	0.316791	2.38351	0.000183849	0.00261597
RP11-378I6.1	lincRNA	3844	0.0235796	0.294092	2.3829	0.00229767	0.0102354
CEACAM5	protein_coding	3351	0.0142097	0.169116	2.38238	0.00203121	0.00941722
GABRD	protein_coding	5556	0.0115246	0.219575	2.38181	0.00262585	0.0112094
EGFLAM	protein_coding	5724	0.0323939	0.255854	2.38175	0.00371166	0.014156
B3GALT5	protein_coding	14319	0.0126663	0.0793743	2.3816	0.00180002	0.00871252
CCDC129	protein_coding	7246	0.0172953	0.144806	2.38099	0.00117785	0.00715683
PROSER2-AS1	antisense	3274	0.31249	0.694509	2.3807	0.00893886	0.0267167
WFDC12	protein_coding	775	0	0.997528	2.38011	0.000410461	0.00427109
ADAD2	protein_coding	4111	0.0028384	0.110964	2.37939	0.00024849	0.00316341
LINC01852	lincRNA	1793	0.0529508	0.405885	2.37869	0.000310035	0.00362741
TWIST1	protein_coding	2033	0.0584707	0.594939	2.37807	0.00212167	0.00965727
CHI3L1	protein_coding	3408	0.032161	0.156767	2.37745	0.00114744	0.00715683
NTF3	protein_coding	2919	0.00180153	0.136843	2.3774	7.02285e-05	0.00146398
PPARGC1A	protein_coding	10870	0.0517406	0.175036	2.3773	0.0102975	0.0296506
RP1-171K16.5	lincRNA	681	0	0.739824	2.37701	0.000450211	0.00446229
ANGPTL3	protein_coding	3250	0.0378604	0.345957	2.37695	0.00286536	0.0119332
LINC01787	lincRNA	1994	0.0128486	0.53879	2.3763	0.00383526	0.0144634
LYPD6B	protein_coding	3771	0.0299483	0.236261	2.37612	0.000640631	0.00531224
C3orf67-AS1	antisense	2551	0.0238357	0.354285	2.3752	0.00628303	0.0207716
SYT10	protein_coding	5082	0.025185	0.306484	2.37426	0.00332241	0.0131213
IER5	protein_coding	4188	17.5807	174.366	2.37401	0.00436937	0.0159124
MBOAT4	protein_coding	1512	0.00693032	0.395808	2.37374	0.000715714	0.0056802
TMEM139	protein_coding	2564	0.0139224	0.393672	2.37364	0.000376757	0.004091
PLN	protein_coding	2001	0.0100943	0.353037	2.37271	0.00247978	0.0107676
PCDHB7	protein_coding	3765	0	0.174441	2.37181	0.000239767	0.00308304
LMOD3	protein_coding	4276	0.0402341	0.315601	2.37166	0.00461296	0.0165281
EFCAB1	protein_coding	5805	0.0240463	0.165381	2.37109	0.0132899	0.0357681
ATP8A2	protein_coding	10415	0.0713915	0.377731	2.37059	0.00655959	0.0214595
PTPN5	protein_coding	5497	0.00833569	0.212131	2.37033	0.000748849	0.00584498
RP11-356M6.1	lincRNA	548	0.0095608	1.58276	2.37006	0.00179898	0.00871252
NOX1	protein_coding	2529	0.0457622	0.382422	2.36948	0.00236319	0.0104439
CTB-51A17.1	antisense	3625	0.0110979	0.256635	2.36937	0.0054955	0.0187912
C1orf226	protein_coding	4495	0.0594496	0.477894	2.36935	0.00751826	0.0236121
RP11-386B13.4	lincRNA	911	0.00937438	0.936388	2.36907	0.00126987	0.0071876
RP11-379K17.4	antisense	7977	0.00897076	0.100195	2.36904	0.000221507	0.00292416
GATA5	protein_coding	2595	0.078214	0.496642	2.36845	0.00386813	0.0145468
UCHL1	protein_coding	2282	0.562629	2.11059	2.36712	0.000361185	0.00399948
TMPRSS3	protein_coding	5660	0.0137462	0.181519	2.36648	0.00200414	0.00932552
CARS-AS1	antisense	2683	0.0273158	0.215807	2.3657	0.000747657	0.00583898
LOXHD1	protein_coding	9020	0.0759043	0.512591	2.36512	0.000347717	0.00390812
HSPB8	protein_coding	2860	0.0107968	0.3417	2.3651	0.00051267	0.00470896
PPFIA2	protein_coding	8573	0.0270941	0.138197	2.36489	0.00309451	0.0125174
TRIB1	protein_coding	4138	7.88378	57.1676	2.36468	0.000987118	0.00694725
COX6B2	protein_coding	3815	0.0133137	0.23094	2.3643	0.000830253	0.00622254
CTB-133P21.1	lincRNA	790	0	0.711414	2.36416	6.03011e-05	0.00133497
LINC01537	lincRNA	2450	0.0021385	0.25783	2.36406	4.89514e-05	0.00116244
RP11-263J14.1	lincRNA	1622	0	0.375251	2.36305	0.000133343	0.00217096
RTN4RL1	protein_coding	3625	0.153912	0.952442	2.36201	0.0129386	0.0350872
BEND2	protein_coding	4637	0.00581299	0.11606	2.36185	0.00108888	0.00715683
NPTX2	protein_coding	3016	0.852615	2.97293	2.36148	0.0420421	0.0862989
SIGLEC9	protein_coding	2539	0.318031	2.08369	2.36111	0.0216145	0.0515452
CCDC63	protein_coding	2184	0.0183983	0.339213	2.36099	0.00112506	0.00715683
LINC01609	lincRNA	900	0.0248209	0.704628	2.36067	0.00205489	0.00946843
PDK4	protein_coding	4519	0.368107	6.38114	2.35949	0.0221198	0.0525216
LINC02181	lincRNA	4083	0.00600494	0.124855	2.35941	5.17503e-05	0.00120109
RP11-401P9.5	antisense	5275	0.0445583	0.438458	2.35937	0.00448779	0.0161797
RP11-546B15.1	antisense	988	0.0466881	0.691902	2.35916	0.000174477	0.00252866
LDB3	protein_coding	6676	0.0259627	0.186429	2.35898	0.00211815	0.00964705
BMPR1A	protein_coding	11412	0.0436666	0.198641	2.35872	0.0150926	0.0393075
TTC16	protein_coding	6370	0.0115563	0.213131	2.35868	0.00152771	0.00786468
UBE2QL1	protein_coding	4317	0.0112613	0.225171	2.35808	0.00276366	0.0116359
PSAT1	protein_coding	2188	0.250918	1.14206	2.358	0.00875368	0.0263159
RP11-1080G15.1	lincRNA	1460	0.0567951	1.4253	2.35706	0.00675051	0.0219324
CHGA	protein_coding	3102	0.0171494	0.227812	2.35701	0.000296696	0.00351645
RP13-895J2.2	antisense	1819	0	0.550475	2.3564	0.00356978	0.0137567
RP11-629G13.1	antisense	1975	0	0.263485	2.35468	0.000233434	0.00303464
CAGE1	protein_coding	3512	0.233104	1.06964	2.35424	0.00560918	0.0190716
DOK5	protein_coding	2604	0	0.234092	2.35392	8.96173e-05	0.00169445
PRSS51	protein_coding	3036	0.0094126	0.247978	2.35367	0.00384886	0.0145028
AC114730.3	antisense	2132	0.0502814	0.643359	2.35339	0.00449063	0.016188
GLDN	protein_coding	7144	0.0133647	0.124386	2.3526	0.000902889	0.0065919
TTR	protein_coding	2173	0.0609842	0.734312	2.35247	0.00864176	0.0260765
LRRC8E	protein_coding	4329	0.040323	0.366705	2.35239	0.00232825	0.0103386
OLIG2	protein_coding	3352	0	0.374413	2.35235	0.000226318	0.0029698
OR2B6	protein_coding	942	0.0111649	0.720475	2.35229	6.28616e-05	0.00136412
LINC02111	lincRNA	2312	0	0.192438	2.35103	4.92416e-05	0.00116758
MT1G	protein_coding	750	0	0.978226	2.35068	0.000136495	0.00219897
HEPHL1	protein_coding	5345	0.0214432	0.248892	2.34866	0.00630498	0.0208262
AC083949.1	antisense	947	0.0524345	0.971981	2.34845	0.000593613	0.00505977
HTRA3	protein_coding	3321	1.36993	3.23227	2.34775	0.00727126	0.0230728
RP11-471B22.3	lincRNA	4609	0.158644	0.810802	2.34718	0.00212834	0.00967903
CDH17	protein_coding	3901	0.0239882	0.169221	2.34707	0.00153335	0.00788133
LINC01043	lincRNA	6897	0.013522	0.204558	2.347	0.00552468	0.0188595
RP1-142L7.5	antisense	1509	0	0.708813	2.34674	0.0017563	0.00857238
TNFAIP8L3	protein_coding	2280	0.00945375	0.425081	2.34588	0.000539973	0.0048372
MAP2	protein_coding	11559	0.0442356	0.265828	2.34538	0.0186881	0.0463073
SLC7A11	protein_coding	9645	0.133854	0.632612	2.34499	5.07955e-05	0.0011852
LL0XNC01-16G2.1	protein_coding	3348	0.0057565	0.221798	2.3447	0.00028971	0.00347562
AP002954.3	antisense	1388	0.0417815	0.45854	2.34427	0.000160748	0.00241839
PRDM9	protein_coding	4184	0.0158364	0.185919	2.34351	0.00146688	0.00774049
FAM186A	protein_coding	8296	0.0366792	0.136306	2.34288	0.00254174	0.0109601
LINC00964	lincRNA	5038	0.0343317	0.240413	2.34261	0.00657686	0.0215091
PCDHB10	protein_coding	3290	0.0265797	0.299573	2.34138	0.00303371	0.01233
SYT6	protein_coding	5104	0.0275764	0.180407	2.34045	0.00159631	0.00807973
RP11-401F2.3	antisense	689	0.178447	1.15481	2.34032	0.000800003	0.00608644
FGF2	protein_coding	6775	0.0187816	0.223057	2.34001	0.00437213	0.0159197
ERICH3-AS1	antisense	5371	0.0049346	0.142592	2.33882	0.000579026	0.00500318
TSPAN12	protein_coding	3368	0.128891	0.450623	2.3387	0.00875335	0.0263159
FGF12	protein_coding	7355	0.00705157	0.120703	2.33857	0.000444567	0.00443211
GRIK4	protein_coding	7518	0.0147837	0.228184	2.33832	0.00513177	0.0179308
LINC01823	lincRNA	1451	0	0.450119	2.33774	0.00171696	0.00844216
ANXA13	protein_coding	3806	0.093184	0.663387	2.33769	0.0163655	0.0418452
ZCCHC12	protein_coding	2231	0.162472	1.53804	2.33695	0.0181701	0.0453197
MYEOV	protein_coding	3760	0.012664	0.135682	2.33672	0.000181302	0.0025965
RP11-735G4.1	lincRNA	1586	0.0107693	0.656307	2.3367	0.00203643	0.00943859
HP	protein_coding	5405	0.0354423	0.173519	2.33667	0.00161428	0.00810547
RP11-303E16.7	lincRNA	1088	0.147924	2.2813	2.33608	0.00677862	0.0220049
RP11-709D24.6	antisense	1543	0.0127759	1.86517	2.33582	0.00613983	0.0204235
C1QTNF7	protein_coding	5583	0.0106966	0.118989	2.33561	0.000596974	0.00507494
CDH20	protein_coding	4119	0.0138226	0.219587	2.33547	0.00120409	0.00715683
MAOA	protein_coding	5528	0.498899	0.861161	2.33539	0.0305023	0.0674006
SLC24A5	protein_coding	4778	0.0011006	0.187115	2.33493	0.0011286	0.00715683
GREB1L	protein_coding	10572	0.00704271	0.119047	2.33473	0.00188522	0.00894986
TMEM262	protein_coding	4194	0.0541361	0.691288	2.33451	0.00419772	0.01542
LRRC31	protein_coding	3113	0	0.124321	2.33437	0.000101009	0.00182759
LIPH	protein_coding	4122	0.0285148	0.227279	2.33418	0.00178663	0.00867218
PWRN3	lincRNA	849	0.0402358	0.989998	2.33409	0.00073735	0.00578612
RP3-340N1.2	lincRNA	2639	0.00333468	0.415237	2.33378	0.000830205	0.00622254
SAGE1	protein_coding	2953	0.0435866	0.323502	2.33322	0.00530259	0.0183543
ODF3L1	protein_coding	1196	0.6971	3.07704	2.33186	0.00322196	0.0128535
DSCR8	protein_coding	1472	0	0.505742	2.33103	0.0010644	0.00715683
COLCA2	protein_coding	2059	0	0.209257	2.33058	9.79075e-05	0.0017863
LINC02096	lincRNA	953	0	0.940498	2.33024	0.00186385	0.00887997
ADCY8	protein_coding	5961	0.0493604	0.410181	2.33016	0.0136103	0.0364008
GPR85	protein_coding	7396	0.0441073	0.339679	2.33006	0.00358423	0.0137986
GATA6	protein_coding	3945	0.0915508	0.400197	2.32946	0.00723318	0.0230444
CPT1C	protein_coding	5864	0.0244347	0.321947	2.32879	0.00297644	0.0122431
LINC00887	lincRNA	4153	0.0339271	0.24084	2.32842	0.0019784	0.00923934
SOWAHB	protein_coding	3220	0.00916066	0.115365	2.32827	0.000105612	0.00188213
PRRG1	protein_coding	6180	0.0771389	0.478315	2.32818	0.0121749	0.0335495
HIST1H3D	protein_coding	1637	0.888445	6.85684	2.32795	0.00354581	0.0136884
MEIS3	protein_coding	5122	0.0144583	0.221619	2.32614	0.00190521	0.00902104
SULT2A1	protein_coding	1987	0	0.266108	2.32535	0.000110183	0.00192885
RP1-202O8.3	antisense	837	0.342367	1.6822	2.32481	0.000844739	0.00630341
ALDH1A2	protein_coding	8622	0.0389631	0.38434	2.32436	0.00986251	0.0287159
S100A9	protein_coding	577	13.2888	60.636	2.32416	0.0247301	0.057224
AGBL1-AS1	antisense	2440	0.00215519	0.273078	2.32333	0.000194541	0.00270298
SATB2	protein_coding	10958	0.0610435	0.374537	2.32296	0.000101938	0.00183692
PSG9	protein_coding	5048	0.00231154	0.188659	2.32174	0.00129639	0.00725653
RP13-895J2.6	lincRNA	1793	0	0.335145	2.32074	0.000391773	0.00415968
C8orf34	protein_coding	10499	0.0181233	0.197619	2.31972	0.0077706	0.0241271
PLIN4	protein_coding	6502	0.0543438	0.418792	2.31922	0.00719421	0.0229608
MARCH11	protein_coding	1861	0	0.282685	2.31912	0.000116886	0.00200496
UNC5B	protein_coding	6841	0.292121	1.18516	2.31902	0.00029695	0.00351645
LIPG	protein_coding	13112	0.00848931	0.149335	2.31877	0.00304039	0.0123506
CTD-2165H16.4	antisense	2797	0.238311	2.14869	2.31832	0.0257605	0.0590741
RP11-369E15.1	lincRNA	568	0	1.38158	2.31827	0.00120491	0.00715683
GHR	protein_coding	6610	0.000728925	0.122326	2.31809	0.00015142	0.00233997
FAM71E2	protein_coding	3274	0	0.0973735	2.3179	2.08679e-05	0.000659228
ADGRE3	protein_coding	2837	0.0553516	0.394096	2.31744	0.00224357	0.0100615
THEG	protein_coding	2730	0.00607687	0.197426	2.3173	0.000393787	0.00417961
LINC00487	lincRNA	2202	0.0427741	0.244424	2.31659	0.000676028	0.00549156
CCL16	protein_coding	1744	0	0.244881	2.31623	3.44962e-05	0.000918178
POM121L2	protein_coding	3354	0.0154325	0.359783	2.31604	0.00300818	0.012297
PHLDB1	protein_coding	21721	0.201578	1.36722	2.31598	0.00383636	0.0144646
C5AR2	protein_coding	6802	0.221285	0.785077	2.31441	0.0010099	0.00704292
FPR3	protein_coding	2772	0.104381	1.98789	2.3143	0.0329879	0.0716608
FAM110C	protein_coding	3968	0.00132039	0.250646	2.3142	0.00191106	0.00903789
ORM1	protein_coding	901	0.040705	0.649121	2.31419	0.000575432	0.00498567
HCFC1-AS1	antisense	350	0.0412988	3.25766	2.31384	0.00310789	0.0125517
RP11-215E13.2	lincRNA	1629	0	0.439978	2.31358	0.000635014	0.00529426
GDA	protein_coding	7904	0.0109958	0.208188	2.31327	0.00606053	0.0202035
SOCS3	protein_coding	2734	9.40096	35.6529	2.3131	0.000330141	0.00376991
AC074366.3	antisense	1086	0.0292307	0.518896	2.3129	0.000404826	0.00424687
PRMT5-AS1	antisense	3194	0.289223	1.39833	2.31257	0.00132633	0.00732282
POU3F3	protein_coding	3064	0.0175589	0.4005	2.31249	0.0015221	0.00785108
CSMD2-AS1	antisense	2253	0.0116704	0.287619	2.31155	0.00156013	0.00797094
NEU1	protein_coding	4822	4.73793	26.132	2.31106	7.02927e-06	0.00030443
CYP51A1-AS1	antisense	2957	0.0238045	0.27667	2.3108	0.000539668	0.0048372
SLC34A1	protein_coding	4529	0.00924284	0.127392	2.31049	0.000252285	0.00319164
PDLIM3	protein_coding	9117	0.0213903	0.133052	2.31012	0.00286387	0.0119286
CNTFR-AS1	antisense	1182	0	0.371829	2.30951	0.00035146	0.00392931
BAIAP2	protein_coding	10288	0.769468	4.27276	2.30943	0.000358248	0.0039842
RP11-805I24.3	lincRNA	4039	0	0.235833	2.30907	0.00157326	0.00801404
SEMA5A	protein_coding	12097	0.172165	0.76761	2.30861	0.0399602	0.0830695
DLC1	protein_coding	12794	6.75366	9.87975	2.30851	0.00981336	0.0286081
LINC02074	lincRNA	885	0	1.01464	2.30818	0.00143483	0.00764038
RP11-338I21.1	antisense	2163	0.03552	0.356564	2.30773	0.000666404	0.00544653
RP11-672A2.5	lincRNA	1725	0.249238	0.929574	2.30769	0.00674244	0.0219129
RP11-580I1.1	lincRNA	556	0	2.59191	2.30636	0.00228294	0.0101815
LIN28B-AS1	lincRNA	2860	0.035855	0.556638	2.30606	0.00404962	0.0149961
MAGEB3	protein_coding	2305	0	0.434865	2.30594	0.00184431	0.00882658
XKR4	protein_coding	19885	0.00618375	0.0494201	2.30534	0.00121516	0.00715683
CTD-2227E11.1	lincRNA	747	0	0.444498	2.30509	4.76542e-05	0.00113873
CPM	protein_coding	7535	0.524684	1.55952	2.30499	0.00176058	0.00858781
ACVR2B-AS1	antisense	2517	0.117693	0.391373	2.30477	0.000716547	0.00568535
PID1	protein_coding	3364	0.164988	0.80762	2.30425	0.0211364	0.0507757
CYB5R2	protein_coding	8596	0.00545092	0.140801	2.30341	0.000992062	0.00696598
GABRR3	protein_coding	5703	0.00367478	0.235999	2.30335	0.00171928	0.00844811
GNG4	protein_coding	5401	0.0649334	0.289602	2.30313	0.00605916	0.0202012
CH25H	protein_coding	1686	0.0181916	0.446834	2.30293	0.000474925	0.00452788
GADL1	protein_coding	7330	0.00993288	0.337412	2.30215	0.0129291	0.0350646
RP11-379J5.5	antisense	1695	0	0.603217	2.30153	0.0021485	0.00974615
AP003068.9	antisense	544	0.213841	2.28133	2.3015	0.00187653	0.00892376
MYO1H	protein_coding	4792	0.021743	0.31082	2.30149	0.00603557	0.0201422
LINC01206	lincRNA	14145	0.00935092	0.113401	2.30139	0.00565595	0.0191945
CFAP74	protein_coding	10422	0.00239115	0.0524826	2.30126	0.000137283	0.00220793
LEP	protein_coding	3420	0.0252915	0.21472	2.30077	0.00180206	0.00871252
C2orf16	protein_coding	16402	0.0203275	0.111566	2.29853	0.00501648	0.0176228
TFF2	protein_coding	830	0	1.03273	2.29811	0.00168219	0.00831645
IZUMO1	protein_coding	3415	0.0698728	0.427264	2.29798	0.00400704	0.0148815
AP000692.10	antisense	879	1.46603	4.98035	2.29738	0.000506895	0.00468394
CCR4	protein_coding	3095	0.0790579	0.679403	2.2961	0.00895277	0.0267468
RP11-561I11.3	antisense	766	0	0.823564	2.29595	0.000450726	0.00446472
PGBD5	protein_coding	11304	0.0172469	0.236009	2.29593	0.0132688	0.035724
SERPINA6	protein_coding	1852	0	0.177463	2.29591	3.18254e-05	0.000867877
LINC00167	lincRNA	1419	0.616847	2.3822	2.29575	0.00102465	0.00710268
LINC00701	lincRNA	742	0	0.707678	2.2955	5.28843e-05	0.00122003
MUM1L1	protein_coding	4343	0	0.185077	2.29487	0.00152413	0.00785502
THBS2	protein_coding	6397	0.0195692	0.217532	2.29478	0.00376678	0.0143165
NT5DC4	protein_coding	4225	0.0303766	0.425591	2.29448	0.00340594	0.0133516
CDS1	protein_coding	4461	0.0907362	0.609738	2.29447	0.0189849	0.0468778
LINC01151	lincRNA	571	0	0.99695	2.29381	0.000180609	0.00259097
RP4-671O14.7	antisense	19071	0.0370728	0.103185	2.29371	0.00275988	0.0116232
FGF14-AS1	antisense	537	0.0179449	0.933031	2.29348	0.0009646	0.00686738
CNTNAP3B	protein_coding	13217	0.00255182	0.0647148	2.29345	0.000408303	0.00426006
APOD	protein_coding	2197	0.0468191	0.582122	2.29289	0.0042134	0.0154664
RP11-561B11.3	lincRNA	624	0.0381545	0.879215	2.29198	0.000125997	0.0021024
CHRNA2	protein_coding	5062	0.00962642	0.162356	2.29164	0.00171086	0.00842425
GP1BA	protein_coding	2501	4.65437	29.6664	2.29161	0.0486653	0.0967762
HAVCR1	protein_coding	2151	0.0759818	0.652656	2.29149	0.00292847	0.0121057
RAB20	protein_coding	1518	0.789597	2.99483	2.29137	0.0114271	0.0320321
PPP1R14C	protein_coding	2152	0.12784	0.943965	2.29077	0.0118817	0.0329574
RP11-473M20.5	antisense	3061	0.00171796	0.171208	2.29041	6.79739e-05	0.00143155
LINC01848	lincRNA	518	0	1.37825	2.28992	0.000618952	0.00520591
GABRP	protein_coding	4621	0.0276723	0.201821	2.28987	0.00289893	0.0120095
EFNB1	protein_coding	3314	2.70872	9.09858	2.28962	1.83803e-05	0.000599137
CTC-444N24.13	antisense	1045	0.0393222	0.355549	2.28961	8.33676e-06	0.000343609
TCHHL1	protein_coding	3603	0.0584586	0.420708	2.28909	0.00649936	0.0213033
RP11-1082L8.3	lincRNA	2019	0.227085	0.823251	2.28885	0.00679728	0.0220422
GYG2	protein_coding	3655	0.487356	1.53415	2.28824	0.00841803	0.0255925
AF127936.5	lincRNA	695	0.47871	4.33589	2.28824	0.0162267	0.0415838
PTHLH	protein_coding	3377	0.00535092	0.247356	2.2876	0.000455598	0.0044713
KCNT2	protein_coding	7100	0.100411	0.489878	2.28749	0.0246325	0.0570756
HPSE2	protein_coding	4421	0.0455768	0.432665	2.28596	0.00718976	0.0229537
WNT4	protein_coding	4527	0.0589564	0.285007	2.28587	0.00639822	0.0210459
KLHDC9	protein_coding	1720	0.0484426	0.365543	2.28402	0.000474159	0.00452788
LINC00958	lincRNA	2870	0.140751	0.487804	2.28361	0.00351358	0.0136069
RAB30	protein_coding	11832	0.136628	0.624794	2.28245	4.79306e-05	0.00114356
CD160	protein_coding	3971	0.0306508	0.405218	2.28203	0.00713142	0.0228267
RGS7	protein_coding	2575	0.113878	0.475231	2.2816	0.00565158	0.0191839
CCL21	protein_coding	924	0	0.98672	2.28112	0.000168255	0.00248745
TAAR2	protein_coding	1217	0.00395907	1.08744	2.28097	0.00273909	0.0115562
FMNL2	protein_coding	6519	1.05217	5.73624	2.27926	0.000785559	0.00602464
UGT3A1	protein_coding	8485	0.00324794	0.13651	2.27923	0.000670731	0.00546444
OR2T1	protein_coding	1110	0.00473754	0.612589	2.27902	0.000434734	0.00438245
FZD10	protein_coding	3282	0	0.116855	2.27882	7.18065e-05	0.00149088
PDGFRA	protein_coding	9732	0.0289176	0.282536	2.2786	0.00809408	0.0248361
DNAH5	protein_coding	16475	0.0318851	0.205817	2.27841	0.00445375	0.0161053
DEC1	protein_coding	4707	0.0100388	0.205805	2.27828	0.00233894	0.0103681
ADIPOQ	protein_coding	4613	0	0.0822612	2.27825	0.000145021	0.00228856
ANGPT4	protein_coding	4676	0.00524508	0.111815	2.2766	0.00302346	0.012303
AC012307.2	lincRNA	197	0	2.99334	2.27653	0.000112588	0.00195317
TENM1	protein_coding	12896	0.0279523	0.26116	2.27467	0.0103212	0.0297079
PSORS1C1	protein_coding	5781	0.00740606	0.166693	2.27455	0.00118969	0.00715683
PCDHB11	protein_coding	4198	0.00718736	0.186104	2.27441	0.00037376	0.00407101
AC012594.1	antisense	5251	0.0091333	0.166153	2.2738	0.00070079	0.0056073
GDNF-AS1	antisense	9873	0.0129687	0.185653	2.27269	0.0058826	0.019764
CYP46A1	protein_coding	9352	0.368574	0.367635	2.27257	0.0101102	0.0292607
CDH7	protein_coding	14532	0.0141596	0.0693753	2.27247	0.00148125	0.00775108
MUC21	protein_coding	3793	0.00745018	0.185171	2.27244	0.00126596	0.0071876
UNC5A	protein_coding	4356	0.0135616	0.162972	2.27106	0.000846075	0.00631032
PRIMA1	protein_coding	3892	0.0106213	0.272318	2.27066	0.000917221	0.00665662
RP1-223B1.1	lincRNA	789	0.0266599	0.851078	2.27016	0.00293399	0.0121207
RP11-508N12.2	antisense	2602	0.0038653	0.42157	2.26935	0.00459068	0.0164636
RP4-686C3.7	antisense	872	0.0598007	0.631168	2.26735	0.000122597	0.00207372
FAM3D	protein_coding	1640	0.0278534	0.930387	2.26699	0.00191646	0.00905059
NRXN3	protein_coding	15535	0.0597877	0.187442	2.26684	0.00585445	0.0196961
TRHDE	protein_coding	11950	0.0077626	0.0784739	2.26665	0.0037226	0.0141849
SERPINA9	protein_coding	2561	0.010004	0.352541	2.26579	0.000913264	0.0066389
RP1-65J11.5	antisense	1747	0.0293305	0.605886	2.26559	0.00157748	0.00802821
RP11-204N11.1	lincRNA	3104	0	0.298038	2.26544	0.0040502	0.0149965
RANBP3L	protein_coding	3363	0.00379254	0.391599	2.26532	0.00209256	0.00957445
SORBS2	protein_coding	16730	0.0395409	0.103131	2.26495	0.0045336	0.0163046
CHAD	protein_coding	1802	0.0731798	0.829705	2.26471	0.0154404	0.0399759
SOBP	protein_coding	6904	0.147116	0.832997	2.26447	0.0103714	0.0297815
BCO1	protein_coding	2930	0.0448621	0.328181	2.26425	0.00248578	0.0107788
ANTXR1	protein_coding	8185	0.0879527	0.456351	2.26392	0.0105124	0.0300893
EFEMP1	protein_coding	3962	0.0024322	0.150289	2.26329	0.000303263	0.00356781
CTA-125H2.2	antisense	6326	0.0148499	0.11698	2.26299	0.00239698	0.0105296
RP11-753B14.1	lincRNA	349	0	2.66921	2.26249	0.00133588	0.00734608
TRPC5	protein_coding	5839	0.00180122	0.0760611	2.26228	0.00034812	0.0039098
DCHS1	protein_coding	10765	1.63377	5.50644	2.26197	8.48646e-05	0.001642
SERPINH1	protein_coding	4914	5.44781	31.9617	2.2613	6.07661e-06	0.000274395
ABC7-481722F1.2	lincRNA	441	0.0118805	1.01755	2.26123	2.68693e-05	0.000777615
PRDM1	protein_coding	6369	1.33323	8.33104	2.26094	0.00621219	0.0205751
ALDH1A3	protein_coding	5772	0.0296035	0.218811	2.26059	0.00389693	0.0146282
TMC1	protein_coding	4615	0.0218372	0.61156	2.26055	0.00365708	0.0140039
RP11-525A16.4	lincRNA	628	0.0185807	0.798935	2.26006	0.000237899	0.00306922
IGLL5	protein_coding	1335	0.0736179	0.881468	2.25974	0.0045947	0.0164761
RP11-434D11.4	lincRNA	914	0.133664	1.03486	2.25937	0.000702302	0.00561437
SLC6A20	protein_coding	6651	0.0345402	0.189119	2.25858	0.00391868	0.014668
C1S	protein_coding	6462	0.187486	0.609109	2.25795	0.000888788	0.00652429
LSMEM1	protein_coding	2592	0.605587	3.92803	2.25775	0.000905081	0.00660129
RP11-1084I9.2	lincRNA	877	0.136329	0.638895	2.25721	0.00576044	0.0194652
CCDC39	protein_coding	7695	0.0426567	0.320559	2.25711	0.00744282	0.0234615
RP11-351I24.1	antisense	803	0.0735	1.00917	2.2569	0.00290306	0.0120234
SGCD	protein_coding	10584	0.0276897	0.149589	2.2566	0.00639956	0.0210481
RP11-276H7.2	antisense	904	0	0.726372	2.25629	0.000571195	0.0049717
RP11-133K1.6	lincRNA	4020	0.0710505	0.33958	2.2562	0.0058071	0.0195626
SOD3	protein_coding	2128	0.0223031	0.250977	2.25613	0.000543233	0.0048478
RP11-703M24.5	antisense	1049	0.00499458	0.808077	2.25598	0.000758306	0.00588737
OOEP	protein_coding	1467	0.0335499	1.09947	2.25591	0.00303006	0.012325
GJB2	protein_coding	2427	0.0122227	0.345638	2.2558	0.000629798	0.00526937
SLC7A14	protein_coding	10459	0.0050779	0.0979458	2.25446	0.00306308	0.0124149
ULBP1	protein_coding	3142	0.0382308	0.591665	2.25399	0.00794541	0.0245296
KIAA1671	protein_coding	16439	0.174048	1.13357	2.25342	0.0111857	0.0315224
LINC00504	lincRNA	5095	0.0540252	0.325391	2.25323	0.00671539	0.0218442
PDIA2	protein_coding	2248	0.0160735	0.258808	2.25301	0.000416681	0.00428774
NTM	protein_coding	6956	0.0341734	0.241731	2.25288	0.00453698	0.0163087
EDNRA	protein_coding	4238	0.0283703	0.47336	2.25228	0.00559237	0.0190297
TPD52L3	protein_coding	3465	0.00139053	0.168563	2.25181	0.000279046	0.00339437
HSPA12A	protein_coding	7018	0.0457078	0.179703	2.25168	0.00778224	0.0241497
REN	protein_coding	1734	0.106647	0.768845	2.25079	0.00864018	0.0260765
CTD-2006K23.1	lincRNA	3602	0.0232921	0.356512	2.2505	0.0049698	0.0175029
AQP6	protein_coding	5129	0.0396021	0.398685	2.25007	0.0145603	0.0382258
LINC01845	lincRNA	2012	0.0430886	0.586638	2.25	0.003354	0.013211
CTD-2650P22.1	lincRNA	865	0.589545	2.55413	2.24999	0.00675534	0.0219432
RP11-766F14.2	protein_coding	10086	0.00462767	0.0842028	2.24989	0.00140827	0.00756119
KCNB2	protein_coding	3582	0.01685	0.180556	2.24979	0.000307263	0.00360383
MMP25	protein_coding	4126	0.139731	0.795651	2.24936	0.0239636	0.0558757
PDE6C	protein_coding	3310	0.0722422	0.221682	2.24894	0.00600204	0.0200696
RP11-506B6.6	antisense	4132	0.020643	0.311381	2.24893	0.00660348	0.0215709
DBH	protein_coding	2764	0	0.125908	2.24886	3.97939e-06	0.000205363
SLC9C2	protein_coding	4916	0.0213445	0.197195	2.24886	0.0047672	0.0169431
RP11-16C1.1	antisense	372	0.15246	1.9399	2.24872	0.000683952	0.00553339
ZNF645	protein_coding	1519	0.0213743	0.340245	2.24867	0.00144705	0.00768147
SH2D1B	protein_coding	2797	0	0.252145	2.24859	0.000198582	0.00273717
SLC12A1	protein_coding	12476	0.00716375	0.119746	2.24857	0.00493277	0.0173998
RBM20	protein_coding	8162	0.0438889	0.240827	2.24814	0.0054603	0.0187104
TXNDC2	protein_coding	3392	0.0670651	0.654353	2.24796	0.0157758	0.0406589
RP11-588H23.3	antisense	6368	0.0387704	0.254086	2.24749	0.00528258	0.0183074
RP11-557H15.4	lincRNA	1404	0	0.27856	2.24716	3.62607e-05	0.000948504
COL4A4	protein_coding	9895	0.031806	0.133611	2.24669	0.00437705	0.0159357
PRSS35	protein_coding	2440	0.00700005	0.437815	2.24632	0.00021066	0.00283708
PRAMEF1	protein_coding	2426	0.0127566	0.207031	2.24601	0.000916777	0.00665662
INSL4	protein_coding	1952	0.00268408	0.265011	2.24596	0.000595596	0.00506669
CACNA1C-AS3	antisense	444	0	1.80038	2.24508	0.00339553	0.0133162
RP11-871F6.3	lincRNA	1003	0	0.629131	2.24392	0.00042548	0.00433326
MCF2L	protein_coding	23148	0.220503	0.755453	2.24311	1.38394e-05	0.000499167
SLC13A1	protein_coding	4415	0.00555515	0.199054	2.24287	0.00178416	0.00866566
FBXW10	protein_coding	4390	0.00839937	0.253898	2.24253	0.00248032	0.0107676
ADGRL3	protein_coding	13991	0.086207	0.169444	2.24239	0.00931796	0.0275404
FETUB	protein_coding	2024	0.0254449	0.249573	2.24226	0.0024314	0.0106248
CTD-2562J17.4	lincRNA	862	0	0.445738	2.24225	0.000996271	0.00698915
LINC02112	lincRNA	2487	0	0.195466	2.24013	0.000135786	0.0021925
RP11-315E17.1	antisense	2310	0	0.196554	2.24011	0.000167935	0.00248632
GALNT18	protein_coding	3627	0.234549	0.968697	2.23949	0.00841905	0.025593
RP11-90P13.1	lincRNA	3208	0.0276464	0.352964	2.23945	0.0025522	0.0109959
AQP10	protein_coding	2292	0.119456	0.712549	2.23914	0.00834741	0.0254004
RXRG	protein_coding	2696	0.0522912	0.469942	2.23884	0.00592227	0.0198721
AGTR1	protein_coding	3478	0.0741072	0.684379	2.2381	0.0122216	0.033651
NLRP14	protein_coding	3628	0.0237801	0.484682	2.23784	0.00994269	0.0289028
CTC-558O2.1	antisense	3478	0.00736635	0.160555	2.23715	0.00166735	0.00827845
RP11-672A2.6	lincRNA	831	0.0211798	0.754625	2.23599	0.000310002	0.00362741
PXT1	protein_coding	2108	0.0885584	0.450474	2.23516	0.00425697	0.0155761
PRRX1	protein_coding	8246	0.0132652	0.173235	2.23395	0.0100274	0.0290856
AGT	protein_coding	2291	0.0745157	0.496328	2.23378	0.0106448	0.0303689
ARHGAP26-AS1	antisense	990	0	0.414345	2.23377	0.000445823	0.00444181
WASF3	protein_coding	5162	0.426704	1.21209	2.23366	0.0148176	0.0387653
RP11-845M18.7	antisense	647	0	0.381022	2.23307	8.03242e-05	0.00158955
LINC02208	lincRNA	3385	0.0014234	0.102289	2.23285	8.83515e-05	0.00168087
SYNGR3	protein_coding	3420	0.289617	1.21115	2.23279	0.00320664	0.0128157
THY1	protein_coding	5925	0.0259216	0.175102	2.23275	0.00236846	0.0104551
RP11-54O7.17	lincRNA	2086	0.217261	2.64285	2.23248	0.0277928	0.0626491
LINC00862	lincRNA	3174	0.0781337	0.615424	2.23223	0.00934858	0.0276021
SYNPO2L	protein_coding	5147	0.0699087	0.294374	2.23172	0.00402424	0.0149277
RP11-56N19.5	antisense	1868	0.0124932	0.84289	2.23148	0.00328401	0.013038
SFTPB	protein_coding	4110	0.0158765	0.204256	2.23119	0.00211008	0.00962023
GLT8D2	protein_coding	3271	0.0105803	0.138902	2.2303	3.35109e-05	0.000903534
LINC01595	lincRNA	710	0.560784	1.0676	2.23014	0.0240829	0.0560983
LINC00668	lincRNA	4866	0.0403661	0.200809	2.23002	0.00461978	0.0165467
SLC7A13	protein_coding	2246	0.00437832	0.378307	2.22988	0.00281275	0.0117845
CTD-2555C10.3	lincRNA	1603	0.0105477	0.276165	2.22976	0.000103405	0.00185681
IPCEF1	protein_coding	8474	0.339242	0.916224	2.22911	0.0308289	0.0679033
DHCR24	protein_coding	4250	3.63291	13.4627	2.2286	5.13712e-09	2.2217e-06
CARD14	protein_coding	8208	0.0148033	0.0931037	2.22848	0.000673577	0.0054818
RP11-849N15.1	antisense	373	0	1.96526	2.22802	0.00372882	0.0142038
NXPH4	protein_coding	2150	0.0209286	0.287969	2.22778	0.000583332	0.00501871
GOT1L1	protein_coding	1589	0.00303222	0.432969	2.22754	0.000535226	0.00481792
RP13-379O24.3	lincRNA	725	0.0218928	0.506942	2.2274	0.00117921	0.00715683
TMEM95	protein_coding	1224	0.0118093	0.300054	2.22692	6.58565e-05	0.00140138
ATP2B3	protein_coding	7534	0.0260475	0.165681	2.22679	0.00201553	0.0093589
WWC2-AS2	lincRNA	2183	0.0277569	0.364616	2.22661	0.000998239	0.0069997
RP11-710C12.1	antisense	3329	0	0.152863	2.22632	0.000157789	0.0023938
CXADR	protein_coding	6682	1.39485	1.79413	2.22598	0.0425629	0.0871755
ERC2	protein_coding	7933	0.0203351	0.159181	2.22535	0.00288406	0.0119713
LINC00671	lincRNA	2167	0.0024267	0.47442	2.22516	0.00259634	0.0111221
SEMG2	protein_coding	2051	0.146168	0.776559	2.22366	0.0156061	0.040321
CCDC33	protein_coding	7067	0.0119934	0.17953	2.22345	0.00778375	0.0241519
ARHGEF3-AS1	antisense	647	0.0242936	0.637895	2.22167	0.000351899	0.0039321
AMBP	protein_coding	2041	0.0531847	0.658805	2.22158	0.00603717	0.0201453
CD1C	protein_coding	1435	0.392997	3.17123	2.22088	0.0376607	0.0792103
CDKN1A	protein_coding	3050	6.28072	26.411	2.22069	0.0244706	0.0567947
MLXIPL	protein_coding	4815	0.0135298	0.249038	2.22057	0.00138633	0.00749436
RP3-406P24.4	lincRNA	490	0.125243	1.00284	2.22014	0.000607504	0.00514415
CIART	protein_coding	2683	0.101563	0.700763	2.21998	0.0123984	0.0339825
RPE65	protein_coding	2610	0	0.108753	2.21962	9.35273e-05	0.00173913
GAS6	protein_coding	6006	1.02827	2.54222	2.21922	0.0334205	0.0724417
RP11-489E7.1	lincRNA	550	0	0.688977	2.21899	3.70495e-05	0.000959904
PNLIP	protein_coding	1539	0.027398	0.346722	2.21875	0.00026746	0.00330621
IGLON5	protein_coding	2606	0.0859009	0.25321	2.21858	0.000538803	0.0048372
AOC3	protein_coding	4524	0.182988	0.913923	2.21784	0.000323295	0.00372223
FHOD3	protein_coding	7965	0.052932	0.267901	2.21775	0.00466585	0.0166651
SAMMSON	lincRNA	2088	0.00634668	0.385202	2.21766	0.000495112	0.00463221
MYH6	protein_coding	6493	0.0694084	0.38642	2.21764	0.0130247	0.0352555
AC004019.13	antisense	1960	0.0347524	0.19405	2.21764	9.665e-05	0.0017739
NIPAL4	protein_coding	4208	0.111419	0.842666	2.21706	0.0161457	0.0414072
HSD17B14	protein_coding	1281	0.460163	2.35836	2.21705	0.00409453	0.0151096
FBN2	protein_coding	13196	0.81495	2.69888	2.21652	2.74175e-05	0.000787541
SYPL2	protein_coding	3963	0.00215495	0.0882727	2.21619	0.000119933	0.00203826
ADRB1	protein_coding	2853	0.217759	1.18174	2.21618	0.021064	0.0506254
TBX5	protein_coding	4363	0.00120529	0.126704	2.21617	6.49363e-05	0.00139144
KCNA1	protein_coding	7997	0.0114296	0.0842151	2.21615	0.00208594	0.00955697
CDK5R2	protein_coding	2508	0.00209676	0.353944	2.21601	0.00210894	0.00962023
RP11-381K20.4	lincRNA	391	0	2.42426	2.21549	0.00264804	0.011281
HIPK4	protein_coding	2452	0.010767	0.463984	2.21495	0.00219118	0.0098901
RP11-23D5.1	lincRNA	285	0	2.45558	2.21493	0.00104862	0.00715683
RTBDN	protein_coding	2675	0.0162095	0.333481	2.21477	0.00443635	0.016068
SLITRK6	protein_coding	4318	0.0338463	0.534789	2.21334	0.00886851	0.02657
LINC02150	lincRNA	2120	0.0365842	0.253806	2.21292	0.000237748	0.00306922
HUNK	protein_coding	8294	0.0237654	0.175435	2.2127	0.00608646	0.0202768
RP11-831A10.2	lincRNA	1250	0	0.330857	2.21204	0.000193736	0.00269645
CTD-2162K18.3	lincRNA	2197	0.00954785	0.211781	2.21134	0.000380081	0.00410529
RP11-344P13.4	lincRNA	309	0.0496295	2.97209	2.21039	0.00257361	0.0110514
ALPK2	protein_coding	9431	0.057564	0.335574	2.20958	0.0245442	0.0569312
HNF1A	protein_coding	5028	0.00945077	0.0952165	2.2094	0.000518814	0.00473689
SRGAP1	protein_coding	26641	0.109493	0.54724	2.20855	0.0166377	0.0423789
KCNJ8	protein_coding	2484	0.0255592	0.345901	2.2084	0.00122474	0.00715683
PRR26	protein_coding	9247	0.0581294	0.227843	2.20808	0.024761	0.0572609
RP11-395N3.2	lincRNA	584	0.00900456	1.2608	2.20784	0.00056841	0.00495321
LRRC15	protein_coding	5940	0.00640428	0.1302	2.20761	0.00115509	0.00715683
DAND5	protein_coding	1997	0.0288228	0.380614	2.20755	0.00128286	0.00723019
NT5C1A	protein_coding	1107	0	1.27205	2.20554	0.00261302	0.0111642
POF1B	protein_coding	4029	0	0.0689039	2.20522	7.89327e-05	0.00157486
AC007682.1	lincRNA	3939	0	0.0805548	2.20516	0.000164257	0.00245196
ATP12A	protein_coding	4442	0.0727038	0.353604	2.20383	0.0130205	0.0352555
LINC00269	lincRNA	2173	0	0.142083	2.20305	6.17719e-05	0.00134905
RP11-91I20.3	lincRNA	3786	0.00276773	0.135769	2.2018	0.000585777	0.00502707
DCDC1	protein_coding	13160	0.0175466	0.123616	2.20151	0.0111526	0.0314552
AC015987.1	antisense	804	0.00599278	0.721711	2.20144	0.00158318	0.00804275
OTX1	protein_coding	4833	0.00530109	0.114412	2.20116	0.00046045	0.00448275
CTD-2552K11.2	antisense	940	0	0.555402	2.20115	0.00115883	0.00715683
OR2AP1	protein_coding	930	0.00918286	1.09232	2.20094	0.00423659	0.0155196
FGFR3	protein_coding	4834	0.74879	1.70591	2.20057	0.00173327	0.00848967
GLTPD2	protein_coding	1023	0	0.616117	2.19968	0.000782683	0.00601127
RP11-280O1.2	antisense	4036	0.0183932	0.162129	2.19834	0.00237219	0.0104671
RP11-519G16.3	antisense	3886	0.0714506	0.537649	2.1983	0.0118074	0.0328137
CLDN3	protein_coding	1274	0	0.252986	2.19813	7.23439e-05	0.00149689
IL17RD	protein_coding	9561	0.0221081	0.163956	2.19807	0.00550224	0.0188058
CERS1	protein_coding	3753	0.0232355	0.263033	2.19806	0.00192241	0.0090661
C6orf10	protein_coding	2474	0.0192469	0.14709	2.19805	0.000629769	0.00526937
RSPO1	protein_coding	3089	0.510378	0.567643	2.19776	0.00929018	0.0274848
LINC01346	lincRNA	3894	0.0194033	0.261586	2.19774	0.0051829	0.0180786
RP11-166N17.1	antisense	1109	0	0.393466	2.19761	0.000510274	0.00469749
PAX2	protein_coding	6243	0.0257473	0.168416	2.1972	0.00885082	0.0265404
AC012531.25	lincRNA	2680	0.00781988	0.104529	2.19633	8.77878e-05	0.00167533
RP11-298D21.3	antisense	566	0	0.818967	2.19594	0.00156575	0.00798678
POM121L12	protein_coding	1283	0.00816729	0.427908	2.19554	0.000732002	0.0057515
LINC02057	lincRNA	1036	0.0101519	0.567755	2.19514	0.000780782	0.0060048
SPTBN5	protein_coding	12338	0.0555361	0.370859	2.1951	0.0120461	0.0332933
FAM9C	protein_coding	5858	0.00254269	0.115986	2.19481	0.00226199	0.010119
DLX6-AS1	antisense	16633	0.00496617	0.0691744	2.19477	0.00524649	0.0182238
SSTR2	protein_coding	7852	0.0687535	0.686414	2.1941	0.0402144	0.0834567
NOSTRIN	protein_coding	5248	0.217469	1.09522	2.19392	0.00358565	0.0138023
LINC02086	lincRNA	3858	0.0381825	0.259544	2.19388	0.00696649	0.0224087
ITGA10	protein_coding	6320	0.122096	0.964868	2.19357	0.0177946	0.0446078
ACSM5	protein_coding	3963	0.0107747	0.200476	2.19335	0.000636458	0.00529767
LAMC3	protein_coding	7594	0.179041	0.96736	2.19323	0.00232237	0.0103216
COL15A1	protein_coding	6653	0.0403993	0.418512	2.19297	0.0116434	0.0324783
DGKB	protein_coding	9491	0.0103943	0.0591967	2.1929	0.00134277	0.00736402
RP13-653N12.1	lincRNA	996	0	0.430024	2.19284	0.0007652	0.00592591
RP11-634H22.1	antisense	535	1.81501	6.48493	2.19227	0.000707464	0.00563513
RP4-604G5.1	antisense	680	0.0566846	1.09823	2.19216	0.00190231	0.00901001
RP3-395M20.12	lincRNA	996	0.298445	3.36663	2.19209	0.0261637	0.0597977
SMTN	protein_coding	10242	1.75308	6.92703	2.19155	4.27087e-07	4.50657e-05
AC012513.6	antisense	784	0	0.403114	2.19131	0.000159881	0.00241126
PLEKHN1	protein_coding	2833	0.00827219	0.147061	2.19109	0.000360762	0.00399767
MLPH	protein_coding	7514	0.023474	0.310062	2.19011	0.0221992	0.0526859
RP11-622C24.2	lincRNA	6721	0.0275987	0.222445	2.18997	0.0100813	0.0291925
ZPLD1	protein_coding	5130	0.00410032	0.0624456	2.18972	7.56934e-05	0.00153618
RP11-758N13.1	lincRNA	1738	0	0.255139	2.18935	0.000190188	0.00266883
ABLIM2	protein_coding	6049	0.0474958	0.223384	2.18919	0.00407037	0.0150543
WNT1	protein_coding	1347	0.0553502	0.958641	2.18905	0.00731613	0.0231529
SLC35F1	protein_coding	4855	0.0227402	0.153342	2.18851	0.00532483	0.0184126
VGF	protein_coding	2704	0.0423188	0.324574	2.18812	0.00170495	0.00840405
SPARCL1	protein_coding	3477	0.00742426	0.366446	2.18801	0.00181524	0.00874061
MALL	protein_coding	3167	0.00539315	0.113332	2.18799	0.000739561	0.00579889
FBXL2	protein_coding	7664	0.125779	0.364721	2.18743	0.006008	0.0200851
AC008268.1	lincRNA	1119	0	0.45591	2.18743	0.00211156	0.00962269
MTRNR2L8	protein_coding	1303	3.36096	43.1204	2.18705	0.00260893	0.0111542
RP11-834C11.4	lincRNA	2310	0.0159503	0.131798	2.18667	0.000628787	0.00526378
LINC00370	lincRNA	698	0	0.553649	2.18665	0.000320459	0.00370483
GREM2	protein_coding	4170	0.0660297	0.231938	2.18635	0.00986206	0.0287159
RP11-519M16.1	lincRNA	2456	0	0.150784	2.1861	6.62342e-05	0.00140649
RP13-379L11.2	lincRNA	1854	0.00569699	0.204971	2.18508	0.0013485	0.00736621
C16orf89	protein_coding	2067	0.00466202	0.21956	2.18501	0.000406187	0.00425167
RP11-524P6.1	lincRNA	478	0	0.993436	2.18498	0.00158615	0.00805164
KRT77	protein_coding	3952	0.0347726	0.227038	2.18497	0.012298	0.0337706
CTD-2278I10.1	antisense	661	0.0258398	1.67953	2.18436	0.00348209	0.0135422
RP4-799D16.1	lincRNA	863	0.21816	1.53433	2.1832	0.00232694	0.0103357
RAMP3	protein_coding	1427	0.0230492	0.363532	2.18243	0.00012366	0.00208175
AP000770.1	lincRNA	738	0	1.19401	2.18159	0.00169515	0.00836836
TBX18	protein_coding	8469	0.0172041	0.0933623	2.18156	0.00157364	0.00801461
GABRG1	protein_coding	6785	0	0.0526152	2.18149	1.98325e-05	0.000636074
TRPV3	protein_coding	9780	0.0541071	0.229468	2.18134	0.0102232	0.0295001
GDF6	protein_coding	3701	0.0214002	0.130633	2.18094	0.00121672	0.00715683
[truncated: 11,813 more rows]

## Sheet: Up in Onco vs Fetal JMML
Gene name	Gene_biotype	Gene_position	FPKM.JMML_O	FPKM.JMML_F	log2FC	pval	qval
LIN28B	protein_coding	chr6:105384491-105531207	3.98354	1.08187	3.79211	0.0025793	0.073225
CLECL1	protein_coding	chr12:9868456-9885895	6.41242	0.485989	3.43943	0.000739423	0.0387769
WT1	protein_coding	chr11:32409321-32457176	4.28506	0.714902	3.09149	0.00067968	0.0374199
IGLON5	protein_coding	chr19:51815102-51833608	2.60027	0.431738	2.90511	0.0019343	0.0635811
PLPP1	protein_coding	chr5:54720682-54830878	3.44343	1.01761	2.71485	2.12463e-06	0.00127447
PTX4	protein_coding	chr16:1535887-1538982	4.96066	3.40485	2.6514	0.00151856	0.0559605
LINC01684	lincRNA	chr21:25801054-25920256	1.13194	0.411581	2.63557	0.00267341	0.0745652
INHBA	protein_coding	chr7:41706766-41745432	1.85411	0.301346	2.52064	0.00450319	0.0972983
STAR	protein_coding	chr8:38001167-38008783	7.31161	1.91509	2.28538	0.000380112	0.0274835
IGSF10	protein_coding	chr3:151143172-151176497	4.35864	2.93284	2.26012	0.00249589	0.072835
OR3A2	protein_coding	chr17:3181193-3182268	1.51498	0.0111468	2.08292	0.000389858	0.0278536
DBNDD1	protein_coding	chr16:90071273-90086536	0.333833	0.067281	2.05951	0.000736495	0.0387281
RP11-17A4.2	antisense	chr8:57358366-57464626	0.417709	0.015983	2.03545	0.00369593	0.088094
RP11-372K14.2	antisense	chr4:152061143-152062255	5.88303	1.86556	1.95763	0.0011675	0.0485465
CHRM4	protein_coding	chr11:46406648-46408158	2.21986	0.905064	1.95357	0.00257379	0.073225
CLCF1	protein_coding	chr11:67131639-67141648	3.23419	1.34014	1.94158	0.00383146	0.089958
POU1F1	protein_coding	chr3:87308554-87325737	1.31853	0.0154518	1.93685	0.00273451	0.0749376
TCAF2	protein_coding	chr7:143318043-143427502	0.701235	0.236308	1.87352	0.00326623	0.0824684
TRBJ2-2P	TR_J_gene	chr7:142494381-142494426	17.0661	8.33651	1.79454	0.000568293	0.0336972
RP5-894A10.2	antisense	chr7:141352181-141356610	1.78321	0.638797	1.78497	0.00285186	0.0763849
TMEM60	protein_coding	chr7:77423045-77427897	2.51677	1.27103	1.76443	0.0037857	0.0893127
RP13-131K19.6	antisense	chr3:49066749-49067139	7.04418	2.49815	1.63995	0.00128226	0.0506525
CTB-13F3.1	antisense	chr7:107582561-107583185	1.36767	0.175004	1.6245	0.00215855	0.0678834
MXRA7	protein_coding	chr17:74668633-74707098	1.12206	0.490161	1.61325	0.00444452	0.096622
RP11-85E16.1	lincRNA	chr7:36773609-36774140	1.33368	0.10614	1.61269	0.00122127	0.0493965
BIRC6-AS1	antisense	chr2:32602699-32604667	0.58692	0.0147615	1.60534	0.00152508	0.0560095
RP11-348P10.2	lincRNA	chr3:44708904-44710856	5.96818	2.60733	1.56157	0.000403925	0.0283816
GPR174	protein_coding	chrX:78426469-78427726	11.2701	4.50973	1.46062	0.000117748	0.0145576
PANX2	protein_coding	chr22:50609160-50618723	4.61837	2.44048	1.40086	0.00269737	0.0746608
ITM2A	protein_coding	chrX:78615881-78623164	38.2264	16.5492	1.39208	2.71948e-06	0.00139701
RHBDD2	protein_coding	chr7:75471920-75518244	21.2316	8.13717	1.35296	0.000226089	0.0203641
PTX3	protein_coding	chr3:157154578-157161417	28.8922	14.5273	1.34581	5.05279e-05	0.00839334
TRBC2	TR_C_gene	chr7:142498725-142500432	61.133	35.2922	1.34235	0.000318208	0.0242747
MEST	protein_coding	chr7:130126012-130146137	12.3889	6.73748	1.32555	8.73159e-05	0.0123801
ZNF680	protein_coding	chr7:63980262-64023484	3.35955	1.90694	1.27759	0.000575861	0.0336972
PRAF2	protein_coding	chrX:48928813-48931730	2.17213	1.15639	1.26077	0.00361443	0.086846
TOPORS-AS1	protein_coding	chr9:32551142-32567003	2.59087	1.41997	1.25868	0.00288774	0.0769873
FBXO36	protein_coding	chr2:230787018-230877825	0.913929	0.419638	1.24673	0.00348083	0.0852479
RP11-242O24.5	antisense	chr1:29479001-29479503	0.780171	0	1.17743	0.00257938	0.073225
GNAI1	protein_coding	chr7:79763271-79848718	33.1486	13.7159	1.1584	0.000311767	0.024102
SPRY1	protein_coding	chr4:124317950-124324915	31.7473	17.928	1.15016	0.00121544	0.0493367
CTSW	protein_coding	chr11:65647280-65651212	96.6395	45.6674	1.1458	2.50316e-06	0.00139513
HMGA2	protein_coding	chr12:66217911-66360075	3.92761	1.78331	1.14159	0.00226293	0.069744
PSMA2	protein_coding	chr7:42956456-42971822	1.89637	1.04212	1.11774	0.0033997	0.0841919
CCZ1	protein_coding	chr7:5938356-5966181	0.663505	0.407364	1.10528	0.00322413	0.0818465
NDUFA4	protein_coding	chr7:10971578-10979883	8.53275	4.42013	1.0778	0.000841241	0.0414756
GRAMD3	protein_coding	chr5:125695824-125832186	2.37917	1.2948	1.07753	0.00388019	0.0904932
TEX30	protein_coding	chr13:103418340-103426161	13.7056	6.12761	1.07454	0.00161087	0.0574663
RP9	protein_coding	chr7:33134409-33149013	14.9998	7.56911	1.07434	8.61841e-06	0.00279168
CCDC136	protein_coding	chr7:128430811-128462186	7.50058	3.15185	1.07054	0.00232521	0.0704685
LRP12	protein_coding	chr8:105501459-105601252	6.15976	2.79391	1.06431	0.000442694	0.0294451
ZNF273	protein_coding	chr7:64330550-64391344	2.37225	1.50947	1.02932	0.00393751	0.0908163
ELMSAN1	protein_coding	chr14:74181825-74256988	62.7547	34.1107	1.01464	0.000913757	0.0434041
CREB3L2	protein_coding	chr7:137559725-137686813	27.2632	15.2198	1.00228	2.76021e-06	0.00139701
AC002454.1	antisense	chr7:92465797-92546501	30.4284	19.4298	1.00223	0.000453397	0.0297296
PRRC1	protein_coding	chr5:126853301-126890781	7.40902	4.33119	0.987731	0.00164278	0.058153
CBX4	protein_coding	chr17:77806955-77813228	79.5059	47.4924	0.968518	0.00336777	0.0837193
LGALS3BP	protein_coding	chr17:76967320-76976191	56.8749	29.7318	0.96503	0.000836596	0.0413095
DBF4	protein_coding	chr7:87505531-87538856	6.05431	3.7459	0.962751	0.000255769	0.0215191
C1GALT1	protein_coding	chr7:7196565-7288282	8.21552	4.57893	0.960057	0.000108235	0.0137488
H2AFV	protein_coding	chr7:44866390-44887682	55.1966	30.3421	0.949143	1.56802e-05	0.0040633
AC007383.3	lincRNA	chr2:206949329-206951288	13.9144	7.41242	0.942459	0.00372824	0.0884079
TIE1	protein_coding	chr1:43766664-43788779	12.9685	8.07074	0.939119	0.00103361	0.0459043
SMIM24	protein_coding	chr19:3473984-3480540	110.327	74.2801	0.938898	0.00097736	0.0447156
SRI	protein_coding	chr7:87834433-87856308	10.5863	6.43099	0.937187	0.000122081	0.0149685
WBSCR22	protein_coding	chr7:73097355-73119491	7.01349	4.14254	0.934805	9.98864e-06	0.00299872
EPHB6	protein_coding	chr7:142552823-142568847	10.9461	6.82534	0.930631	0.000145878	0.016522
PON2	protein_coding	chr7:95034175-95064641	4.01246	1.97736	0.926362	0.000597882	0.0345013
POM121	protein_coding	chr7:72349936-72421979	9.09603	5.38973	0.926336	3.59058e-07	0.000437205
ASNS	protein_coding	chr7:97481430-97501854	2.60726	1.57967	0.925386	0.001986	0.064524
RP11-617F23.1	antisense	chr15:90617744-90625439	4.37023	2.28	0.914891	0.000289466	0.0232089
IL2RG	protein_coding	chrX:70327254-70331958	68.5727	40.2501	0.901775	4.75867e-07	0.000509666
KCTD10	protein_coding	chr12:109886461-109915349	6.12525	3.49756	0.879431	3.96263e-06	0.00183368
PROSER2	protein_coding	chr10:11865338-11914276	8.60244	5.7279	0.868384	0.000950417	0.0439172
ZSCAN25	protein_coding	chr7:99214569-99230030	5.41397	3.19322	0.862097	0.000171529	0.0176948
CXXC5	protein_coding	chr5:139026884-139063467	60.7903	36.7394	0.85846	0.00160975	0.0574663
HINT1	protein_coding	chr5:130494720-130507428	68.8768	40.9552	0.852089	6.74731e-05	0.010213
PDE4D	protein_coding	chr5:58264865-59817947	8.31215	5.32672	0.848877	0.000111756	0.0140856
NT5C3A	protein_coding	chr7:33053726-33102409	6.93815	4.46022	0.842088	0.00178294	0.0610171
STARD3NL	protein_coding	chr7:38217824-38270272	8.80759	5.23568	0.839763	1.46775e-05	0.00401273
UBLCP1	protein_coding	chr5:158690089-158713048	19.6139	11.7148	0.837635	0.00238775	0.0712847
KMT2E	protein_coding	chr7:104654626-104754808	68.8757	45.0825	0.835227	0.000615473	0.0352233
CALU	protein_coding	chr7:128379346-128411861	25.2294	14.9319	0.833597	0.000781875	0.0398842
ZNF398	protein_coding	chr7:148823508-148879894	11.003	6.98017	0.832098	3.58628e-05	0.00679338
C11orf1	protein_coding	chr11:111749659-111756699	5.05034	3.19115	0.831641	0.00352322	0.0854428
BEX2	protein_coding	chrX:102564274-102565974	34.2996	20.2761	0.825498	0.00392519	0.0907528
KBTBD8	protein_coding	chr3:67048731-67061634	5.77077	3.40147	0.821923	0.00146218	0.0545751
NDUFB2	protein_coding	chr7:140390577-140422590	5.63482	3.56943	0.821409	0.000234024	0.0205433
USP42	protein_coding	chr7:6144515-6201195	13.9128	9.47313	0.819715	0.000667019	0.0369967
CDK6	protein_coding	chr7:92234235-92465908	99.3371	63.1495	0.815996	1.08821e-05	0.00320448
TWISTNB	protein_coding	chr7:19735085-19748710	23.9639	14.5933	0.815754	0.000510205	0.0317209
GCC1	protein_coding	chr7:127220672-127233665	14.5808	9.59908	0.815129	0.000237154	0.0207619
ZNF570	protein_coding	chr19:37958487-37979554	3.21118	1.97461	0.813942	0.000607559	0.0348948
EIF4H	protein_coding	chr7:73588575-73611431	65.2094	41.4174	0.800818	0.000104126	0.0134668
TRIM24	protein_coding	chr7:138145079-138274738	27.9724	17.6725	0.800764	2.11781e-05	0.00500954
SEPHS2	protein_coding	chr16:30454952-30457502	37.435	21.9525	0.790858	0.00134778	0.0518489
CCDC71L	protein_coding	chr7:106297211-106301442	7.38573	5.14592	0.786004	0.00352322	0.0854428
DLD	protein_coding	chr7:107531415-107572175	23.914	15.3214	0.781702	3.082e-05	0.00627875
BCOR	protein_coding	chrX:39909068-40036582	48.5961	29.4727	0.778395	0.00213697	0.0675325
IL18	protein_coding	chr11:112013974-112034840	11.4062	7.32162	0.776792	0.00440639	0.0961804
ZNF777	protein_coding	chr7:149128454-149158214	22.0105	13.9652	0.776689	0.000439592	0.0294203
FSCN1	protein_coding	chr7:5632454-5646286	38.7717	24.9966	0.775499	2.71948e-06	0.00139701
YWHAG	protein_coding	chr7:75956111-75988348	92.1185	61.3859	0.774413	9.95731e-05	0.0131996
EIF2AK1	protein_coding	chr7:6061875-6098861	44.4605	27.9003	0.772911	0.000946012	0.0439014
YKT6	protein_coding	chr7:44240567-44253893	14.3269	9.76762	0.772807	0.0012797	0.0506131
BCL9	protein_coding	chr1:147013182-147098017	6.97787	4.49989	0.772568	0.00301018	0.07908
MDH2	protein_coding	chr7:75677369-75696826	44.4971	28.9707	0.772154	5.53337e-05	0.00887312
ZNF655	protein_coding	chr7:99156029-99174076	9.68558	6.72487	0.771579	0.00226838	0.0698455
SUMF2	protein_coding	chr7:56131695-56148363	29.3693	19.0127	0.768904	9.9982e-06	0.00299872
SBDS	protein_coding	chr7:66452664-66460588	46.2947	31.5724	0.768229	2.6447e-05	0.00590807
OSGIN2	protein_coding	chr8:90914087-90940116	9.91509	6.01338	0.768056	0.00446496	0.0969363
ZNF304	protein_coding	chr19:57862675-57871266	8.06187	4.8198	0.767452	0.000902792	0.0431599
LMTK2	protein_coding	chr7:97736197-97838945	9.90317	6.20251	0.763775	8.58469e-05	0.0123042
GET4	protein_coding	chr7:916189-936073	2.76276	1.73198	0.761749	0.00466416	0.0993957
GBAS	protein_coding	chr7:56019486-56067874	14.2697	9.21644	0.759467	0.00027397	0.0224102
RCC1L	protein_coding	chr7:74441226-74490064	4.49243	3.03762	0.757874	0.000496005	0.0313801
WASL	protein_coding	chr7:123321989-123389121	13.0018	8.98314	0.756035	0.000207235	0.0197434
CFL2	protein_coding	chr14:35175975-35184029	3.05535	1.88725	0.754476	0.00096284	0.0441761
ZNF746	protein_coding	chr7:149169885-149194908	9.16569	6.05894	0.752065	1.54215e-05	0.00406126
PSMA1	protein_coding	chr11:14526420-14665181	5.49224	3.33006	0.747736	0.00180899	0.061481
CAMLG	protein_coding	chr5:134074191-134087850	25.333	17.2278	0.746062	0.000607577	0.0348948
BZW2	protein_coding	chr7:16685756-16746148	44.6134	27.9274	0.745358	7.42151e-07	0.000738567
FAM171B	protein_coding	chr2:187558698-187630692	5.32686	3.46894	0.741148	0.0014761	0.054845
ZNF800	protein_coding	chr7:126986844-127071978	15.4509	10.4493	0.738887	8.66999e-05	0.0123717
KLHL26	protein_coding	chr19:18747775-18782524	3.96532	2.48101	0.736001	0.00353873	0.0856061
PHAX	protein_coding	chr5:125935960-125962944	11.441	7.38439	0.734739	0.00210488	0.0668445
ST7	protein_coding	chr7:116593292-116870157	5.5779	3.53034	0.732655	0.000318497	0.0242747
SSBP1	protein_coding	chr7:141438121-141487722	15.7597	10.308	0.728139	1.47722e-05	0.00401273
NSA2	protein_coding	chr5:74062816-74075938	15.0321	9.40616	0.726902	0.000197674	0.0194765
TNKS1BP1	protein_coding	chr11:57067112-57092426	11.3871	7.08623	0.726606	3.41094e-05	0.00660432
ZDHHC4	protein_coding	chr7:6617065-6629005	6.79272	4.42403	0.72435	0.000896456	0.0431293
MTHFD2L	protein_coding	chr4:74979891-75168816	5.34371	3.31601	0.724117	0.000135814	0.0158819
H1FX	protein_coding	chr3:129033614-129035120	745.929	472.913	0.723434	0.000539067	0.0326383
QPRT	protein_coding	chr16:29690329-29710020	7.87483	4.57781	0.72255	0.00233278	0.0704883
GSTK1	protein_coding	chr7:142941186-142967947	23.8496	16.4989	0.721779	4.6438e-06	0.00193971
NPM3	protein_coding	chr10:103541082-103543170	33.2132	21.8443	0.721693	3.52326e-05	0.00671326
CLEC2B	protein_coding	chr12:10005583-10022735	35.242	20.7746	0.72123	0.00188814	0.0630523
SPATA2	protein_coding	chr20:48519928-48532045	10.6286	6.99135	0.71435	0.00109715	0.0467231
AMER1	protein_coding	chrX:63404997-63425624	5.61033	3.73615	0.713211	0.000532067	0.0323961
KIAA1147	protein_coding	chr7:141356528-141401953	15.4723	10.3904	0.713146	0.000933096	0.0435536
H3F3B	protein_coding	chr17:73772515-73781974	120.392	74.5344	0.71291	0.000390391	0.0278536
PRKAB2	protein_coding	chr1:146626685-146644129	5.84976	3.70501	0.711065	0.00274799	0.0751028
LANCL2	protein_coding	chr7:55433141-55501435	11.23	7.39993	0.710091	0.000700662	0.0376382
MFSD10	protein_coding	chr4:2932288-2936586	17.1126	11.0059	0.708983	4.77325e-06	0.00195715
EPB41L4A-AS1	lincRNA	chr5:111496223-111499973	20.28	12.7236	0.706594	0.00159066	0.0571098
CDK7	protein_coding	chr5:68530622-68573257	7.17784	4.68251	0.706543	0.00113774	0.0476836
CHPF2	protein_coding	chr7:150929575-150935913	18.6888	13.3679	0.702889	0.000347833	0.0257237
SND1	protein_coding	chr7:127292234-127732661	59.1752	40.1763	0.700633	1.87523e-05	0.00453004
CHCHD2	protein_coding	chr7:56169262-56174269	44.132	28.3851	0.700158	0.000392641	0.0279526
RPS4X	protein_coding	chrX:71475529-71497150	346.9	232.196	0.698356	0.00122128	0.0493965
ARID3B	protein_coding	chr15:74833518-74890472	8.86207	5.85893	0.697392	0.000203398	0.0196871
MSANTD3	protein_coding	chr9:103189438-103213993	10.6014	6.58506	0.696403	0.00149128	0.0552695
CDC42SE2	protein_coding	chr5:130581186-130734140	34.4631	22.3955	0.695501	0.00153546	0.0561548
MPP6	protein_coding	chr7:24612887-24733812	6.70908	4.58995	0.695268	0.00333629	0.083289
ZFP1	protein_coding	chr16:75182390-75206134	6.85999	4.58556	0.694909	0.00404383	0.0919556
RPS2	protein_coding	chr16:2012053-2014861	81.4907	56.0793	0.69026	0.00242153	0.071696
ESYT2	protein_coding	chr7:158523686-158622944	50.019	33.7269	0.690122	3.52579e-06	0.00167952
CNOT4	protein_coding	chr7:135046547-135194875	11.4802	7.76415	0.689692	0.000770494	0.0396786
RPL12	protein_coding	chr9:130209953-130213684	98.0232	65.1593	0.689182	0.000547553	0.0330902
SERTAD2	protein_coding	chr2:64858755-64978139	45.1923	29.7919	0.685873	0.000105974	0.013568
MARCKSL1	protein_coding	chr1:32799433-32801980	105.829	69.2902	0.683456	0.00084284	0.0414913
UBXN2A	protein_coding	chr2:24150155-24227779	9.06001	5.84168	0.681367	5.94831e-05	0.00930809
MCM7	protein_coding	chr7:99690351-99699563	100.66	74.7689	0.678129	0.000558864	0.0335857
PRSS57	protein_coding	chr19:685546-695498	245.523	162.308	0.677872	4.98611e-05	0.00832526
PCCB	protein_coding	chr3:135969148-136056738	8.30239	5.72341	0.673758	0.000374329	0.0271867
RP11-620J15.3	lincRNA	chr12:58325311-58329958	79.7303	54.107	0.673321	0.00190219	0.063129
CHCHD3	protein_coding	chr7:132469629-132766848	21.2582	14.4532	0.671166	0.000492566	0.0312235
EEF1B2	protein_coding	chr2:207024309-207027652	68.1608	45.0546	0.667744	0.00048697	0.03099
TMED4	protein_coding	chr7:44617493-44621886	21.4739	14.8884	0.667668	0.000128402	0.0152798
REPIN1	protein_coding	chr7:150065278-150071133	45.7052	35.8299	0.665138	0.000171156	0.0176948
RPLP1	protein_coding	chr15:69745123-69748533	207.566	141.804	0.664696	0.00040191	0.0283015
EEF2	protein_coding	chr19:3976054-3985467	1606.53	1323.22	0.661757	0.000193914	0.0192677
RAP2C	protein_coding	chrX:131337052-131353508	19.0951	12.4874	0.657896	0.00059723	0.0345013
BCL7B	protein_coding	chr7:72950686-72972332	40.4948	29.0466	0.654394	0.00212885	0.0674734
GNA15	protein_coding	chr19:3136191-3163767	143.384	90.0015	0.650337	0.00279238	0.0757988
FNBP1L	protein_coding	chr1:93913688-94020218	10.9594	7.01339	0.650275	0.00352001	0.0854428
ETS2	protein_coding	chr21:40177231-40196879	122.508	83.0834	0.64918	0.00136168	0.0522056
COX5A	protein_coding	chr15:75212132-75230509	44.7648	29.4359	0.644392	0.00254788	0.073225
FAM53C	protein_coding	chr5:137667624-137685418	22.0929	17.2771	0.643604	0.000817696	0.0406239
HIVEP1	protein_coding	chr6:12008995-12165232	17.3784	11.0307	0.642788	0.00232778	0.0704685
TOX	protein_coding	chr8:59717977-60031767	24.1088	16.0128	0.637207	0.000713957	0.0380337
HMGA1	protein_coding	chr6:34204650-34214008	365.75	249.64	0.637166	0.00015529	0.0170928
SEM1	protein_coding	chr7:96110938-96339203	5.68433	4.09326	0.636206	0.00110737	0.0468278
CDS2	protein_coding	chr20:5107432-5178533	12.9641	8.85553	0.635116	3.61247e-05	0.00680321
ZNF35	protein_coding	chr3:44690219-44702283	15.6434	10.2936	0.634885	0.00146243	0.0545751
PTP4A1	protein_coding	chr6:64231653-64293492	35.9056	23.5079	0.633804	0.00124406	0.049777
RACK1	protein_coding	chr5:180663909-180675096	263.19	203.262	0.633423	0.00104911	0.0461388
FIS1	protein_coding	chr7:100882739-100895597	23.4016	16.4808	0.632926	0.000945603	0.0439014
GUSB	protein_coding	chr7:65425671-65447301	25.6415	17.936	0.631908	0.000222914	0.0203641
EI24	protein_coding	chr11:125439112-125454582	15.1959	10.1407	0.623925	0.000976697	0.0447156
SNHG8	lincRNA	chr4:119199864-119200978	66.155	46.1557	0.62367	0.00107415	0.0463096
POLD2	protein_coding	chr7:44154280-44163957	19.4611	14.0161	0.622262	0.00165229	0.0581593
ATP6V1F	protein_coding	chr7:128502880-128505898	86.7732	63.5574	0.62146	0.00421107	0.0938135
ZNF3	protein_coding	chr7:99661656-99680171	17.4235	13.1931	0.621431	0.00468334	0.0996733
LYPLA1	protein_coding	chr8:54958927-55014577	9.99895	6.73588	0.620109	0.000432303	0.0294203
EIF1AX	protein_coding	chrX:20142636-20159962	7.8537	5.53286	0.620019	0.00431445	0.0949412
PMF1	protein_coding	chr1:156182784-156209833	7.98538	5.73341	0.618827	0.00391443	0.0907528
IDH2	protein_coding	chr15:90626277-90645736	128.662	91.2454	0.618578	0.000123465	0.014969
CHKA	protein_coding	chr11:67820326-67888911	18.8064	12.2964	0.617254	0.000580349	0.0337499
RPL5	protein_coding	chr1:93297582-93307481	349.695	250.537	0.615989	0.00117029	0.0485999
MTPN	protein_coding	chr7:135611509-135662101	50.6034	35.6397	0.614712	0.00298069	0.0786882
DCUN1D1	protein_coding	chr3:182655862-182703741	5.66308	3.86681	0.613991	0.00168461	0.0588018
ZNF766	protein_coding	chr19:52772824-52799299	8.55636	5.93348	0.613837	0.000149076	0.0168253
ORAI2	protein_coding	chr7:102073553-102097268	8.65388	6.06436	0.612928	0.000947947	0.0439172
PPP3R1	protein_coding	chr2:68405989-68483369	44.6581	30.562	0.612084	0.00050557	0.0316811
RPL37A	protein_coding	chr2:217362912-217443903	132.416	95.4261	0.609461	0.000400523	0.0282653
MUL1	protein_coding	chr1:20825941-20834654	16.0988	11.1895	0.609323	0.00383986	0.089958
CANX	protein_coding	chr5:179105629-179157926	168.366	120.931	0.607483	0.000942948	0.043885
RPS12	protein_coding	chr6:133135580-133138703	167.226	118.853	0.607295	0.000868415	0.0422368
TMX4	protein_coding	chr20:7957995-8000476	31.9412	21.5655	0.606101	0.000399822	0.0282653
GARS	protein_coding	chr7:30634297-30673649	37.7029	27.7869	0.604976	0.000779272	0.039877
PMPCB	protein_coding	chr7:102937869-102969958	21.9122	15.4257	0.604731	1.0743e-05	0.00319255
ZNF805	protein_coding	chr19:57752053-57766503	19.7988	13.4104	0.604674	0.00138189	0.052476
MT-ND3	protein_coding	chrM:10059-10404	2864.69	1982.5	0.603137	3.78843e-06	0.00177847
ZBED3	protein_coding	chr5:76367897-76383148	11.2709	7.63131	0.602739	0.00090008	0.0431293
RPL14	protein_coding	chr3:40498783-40510078	33.7278	24.2383	0.602353	0.000753662	0.0391228
RPS25	protein_coding	chr11:118886422-118889401	169.646	118.264	0.600708	0.00193539	0.0635811
RPL19	protein_coding	chr17:37356536-37360980	527.928	397.603	0.60044	0.000180307	0.0181947
QARS	protein_coding	chr3:49133365-49142568	75.0083	52.9835	0.597319	2.87514e-05	0.00612707
ZNF428	protein_coding	chr19:44111371-44124026	21.0177	14.6309	0.596072	0.00121179	0.0493367
NPM1	protein_coding	chr5:170814120-170838141	52.0714	38.4533	0.594855	0.00291409	0.0774349
ZNF669	protein_coding	chr1:247263264-247267674	13.9969	9.34882	0.59469	0.00251367	0.0728548
VOPP1	protein_coding	chr7:55503749-55640681	3.20319	2.18011	0.592842	0.00272037	0.0746806
OCIAD2	protein_coding	chr4:48887036-48908954	15.8001	10.9882	0.592804	0.00245187	0.0720698
ZFP91	protein_coding	chr11:58346584-58388515	25.6287	17.3741	0.591758	0.00343476	0.0847364
NACA	protein_coding	chr12:57106212-57125412	90.9385	67.4013	0.591026	0.00156031	0.0567245
AC004381.6	protein_coding	chr16:20817751-20860990	10.2644	6.66377	0.588809	0.00130522	0.051037
ADNP2	protein_coding	chr18:77866915-77905406	26.1818	18.8586	0.587741	0.000953545	0.0439989
RPS6	protein_coding	chr9:19375713-19380252	1076.06	800.461	0.585311	0.000582554	0.0338174
RPL23	protein_coding	chr17:37004118-37010096	57.1749	40.9498	0.585244	0.000990746	0.0449471

## Sheet: Up in Fetal vs Onco JMML
Gene name	Gene_biotype	Gene_position	FPKM.JMML_F	FPKM.JMML_O	log2FC	pval	qval
MEFV	protein_coding	chr16:3292028-3306627	7.91326	0.265211	5.33453	9.95302e-08	0.000269565
CD14	protein_coding	chr5:140011313-140013286	22.3282	0.911806	5.29259	4.01842e-08	0.000177432
CD300E	protein_coding	chr17:72606026-72619877	30.3651	1.23295	5.25586	4.22207e-06	0.00189946
TBC1D9	protein_coding	chr4:141541919-141677274	4.03985	0.234391	5.1238	5.94058e-09	4.81068e-05
SCIMP	protein_coding	chr17:5112256-5138155	4.07936	0.130177	5.04606	1.10565e-08	5.96901e-05
CD163	protein_coding	chr12:7623409-7656489	30.1362	0.346962	4.57298	0.000151837	0.0170184
SHTN1	protein_coding	chr10:118640993-118886097	4.19917	0.233927	4.55071	4.59686e-09	4.81068e-05
VCAN	protein_coding	chr5:82767284-82878122	29.4385	1.46596	4.51073	1.67039e-05	0.00418552
SIGLEC1	protein_coding	chr20:3667617-3687775	5.62309	0.277514	4.49014	4.38166e-06	0.00191798
ARHGEF10L	protein_coding	chr1:17866330-18024369	1.42254	0.0694575	4.4898	7.43292e-09	4.81534e-05
EPB41L3	protein_coding	chr18:5392380-5630699	4.44509	0.206893	4.43991	0.000536905	0.0325682
MYO1D	protein_coding	chr17:30819540-31204195	2.82856	0.314292	4.41913	1.89502e-06	0.0012036
CX3CR1	protein_coding	chr3:39304985-39323226	4.89106	0.139172	4.33542	2.71394e-06	0.00139701
MARCO	protein_coding	chr2:119699742-119752236	11.9219	0.212177	4.31829	9.34535e-07	0.000796617
CLEC10A	protein_coding	chr17:6977856-6983626	7.00226	0.600134	4.23951	1.64532e-05	0.00416368
LGALS2	protein_coding	chr22:37966253-37978623	10.4749	0.42293	4.23068	2.36269e-07	0.00036568
FPR1	protein_coding	chr19:52248425-52307363	7.48598	0.348945	4.19503	3.45586e-06	0.00167078
MAFB	protein_coding	chr20:39314488-39317880	74.7643	3.44583	4.09593	5.11606e-05	0.00841215
LILRA6	protein_coding	chr19:54720737-54746649	3.00703	0.175531	4.07784	9.00852e-07	0.000788659
ITGB3	protein_coding	chr17:45331212-45389182	7.94472	0.543865	4.06597	0.000155265	0.0170928
IGSF6	protein_coding	chr16:21650858-21663981	9.70428	0.839109	4.04291	0.000224802	0.0203641
LRRK2	protein_coding	chr12:40590546-40763087	2.87951	0.178433	4.04103	1.39546e-06	0.000982644
HK3	protein_coding	chr5:176307870-176326333	6.89106	0.29375	4.03901	4.47935e-06	0.0019346
TGFBI	protein_coding	chr5:135364584-135399507	12.3504	2.00854	4.03089	2.68238e-05	0.00595121
HNMT	protein_coding	chr2:138721590-138773934	1.21662	0.0785128	4.00547	6.07466e-08	0.000218634
MYOF	protein_coding	chr10:95066186-95242074	4.72313	0.544921	3.99705	5.678e-06	0.00212534
NLRP12	protein_coding	chr19:54296857-54327648	1.60982	0.142827	3.98499	5.68693e-09	4.81068e-05
MPEG1	protein_coding	chr11:58975983-58980424	96.3482	14.828	3.97919	0.000681581	0.0374199
CD1D	protein_coding	chr1:158149737-158154686	5.32552	0.591153	3.97766	1.05744e-06	0.000807414
SLC16A2	protein_coding	chrX:73641296-73753752	1.20086	0.0282901	3.97439	2.34584e-07	0.00036568
NFIB	protein_coding	chr9:14081842-14398982	0.42777	0.0407157	3.94256	3.88084e-07	0.000437205
CTSL	protein_coding	chr9:90340434-90346308	12.2853	0.96898	3.90283	0.000153322	0.0170928
PXDN	protein_coding	chr2:1635659-1748624	8.56094	2.41148	3.89934	0.000261779	0.0218604
LRP1	protein_coding	chr12:57522276-57607134	12.2489	0.569924	3.8842	1.0222e-06	0.000807414
ROBO1	protein_coding	chr3:78646390-79816965	4.09715	0.71125	3.85314	0.000515835	0.0318613
WDFY3	protein_coding	chr4:85590763-85887544	3.85574	0.329145	3.84469	3.6768e-09	4.81068e-05
NLRP2	protein_coding	chr19:55464498-55512510	2.12845	0.693748	3.8421	7.19393e-05	0.0107882
AATBC	antisense	chr21:45225639-45232448	1.1902	0.0657538	3.83159	9.98636e-08	0.000269565
SERPINA1	protein_coding	chr14:94843084-94857030	39.3246	1.94893	3.8264	4.76445e-05	0.00808011
WWC2	protein_coding	chr4:184020446-184241930	3.10636	0.429057	3.81232	4.40345e-05	0.00762762
TBC1D12	protein_coding	chr10:96162261-96295687	1.72836	0.14495	3.81129	1.43218e-05	0.00396506
RTN1	protein_coding	chr14:60062694-60337684	3.08491	0.291443	3.80963	8.57213e-06	0.00279168
PARD3	protein_coding	chr10:34398488-35104253	5.00841	0.284394	3.79521	7.53503e-07	0.000738567
GABBR1	protein_coding	chr6:29523406-29601753	3.43085	0.428189	3.77607	5.31067e-05	0.00860116
RP11-597D13.9	antisense	chr4:159091904-159124029	0.516577	0.0557659	3.73638	2.30617e-06	0.00135821
TSPAN9	protein_coding	chr12:3186521-3395730	0.985685	0.0940892	3.70238	3.66375e-07	0.000437205
SMIM25	lincRNA	chr20:48884023-48896332	4.29187	0.161986	3.7006	3.39294e-05	0.00660432
ZNF718	protein_coding	chr4:124362-157779	4.76468	2.12691	3.67574	1.19749e-05	0.00349451
SLC7A7	protein_coding	chr14:23242431-23299029	8.22152	0.517248	3.66909	4.31577e-06	0.00191502
STAC	protein_coding	chr3:36421836-36589499	1.70472	0.304263	3.64575	1.85321e-05	0.00453004
C5AR2	protein_coding	chr19:47835404-47850584	0.988088	0.131204	3.64378	5.82148e-06	0.00214283
ZNF205	protein_coding	chr16:3162561-3170518	1.82549	0.168395	3.61911	2.71663e-06	0.00139701
ITGA2	protein_coding	chr5:52285156-52390609	0.673675	0.0640797	3.61391	7.94966e-06	0.00262761
OLFML2A	protein_coding	chr9:127539437-127577164	1.35575	0.150748	3.60073	3.89507e-07	0.000437205
HPSE	protein_coding	chr4:84213614-84256306	5.09359	0.406744	3.60053	2.79076e-05	0.00602656
HMOX1	protein_coding	chr22:35776354-35790207	36.0174	1.44165	3.59183	0.000156314	0.0170928
LGR4	protein_coding	chr11:27387508-27494322	0.803173	0.166359	3.5741	4.87764e-07	0.000509666
EVC	protein_coding	chr4:5712924-5816032	1.37318	0.163551	3.56481	9.18438e-05	0.0128788
CD226	protein_coding	chr18:67498394-67629039	0.919479	0.074443	3.55707	1.51511e-07	0.000327182
MME	protein_coding	chr3:154741913-154901518	6.11184	0.224544	3.53276	0.000381994	0.0274968
PID1	protein_coding	chr2:229715242-230136001	1.99958	0.0675914	3.50591	3.94497e-05	0.00717896
NPL	protein_coding	chr1:182758428-182799519	2.85881	0.222669	3.50319	2.49504e-05	0.00569151
FCGR3A	protein_coding	chr1:161511549-161520527	9.97921	0.415241	3.49642	0.000747968	0.0390016
MUC20	protein_coding	chr3:195447753-195467994	0.9464	0.11981	3.49579	1.2621e-07	0.000292014
TLR8	protein_coding	chrX:12924739-12941288	2.69026	0.114145	3.48855	9.4078e-05	0.0129675
SLC11A1	protein_coding	chr2:219246752-219261617	7.03531	0.658743	3.48276	1.49895e-05	0.00401273
ARHGAP24	protein_coding	chr4:86396267-86923823	1.00219	0.176477	3.47517	1.73644e-07	0.000330863
PROS1	protein_coding	chr3:93591877-93692910	1.992	0.198607	3.46727	9.62176e-05	0.0129908
LCA5	protein_coding	chr6:80194708-80247175	3.10158	0.64167	3.45924	0.000874137	0.0422613
TOM1L1	protein_coding	chr17:52976748-53039317	0.959963	0.149737	3.45793	7.82026e-06	0.00261148
KIAA1671	protein_coding	chr22:25348697-25593415	0.812694	0.120015	3.44742	3.03544e-05	0.00622303
CTD-2006K23.1	lincRNA	chr17:72595979-72603368	0.755309	0.0590797	3.44472	3.06266e-07	0.00043133
TDRD9	protein_coding	chr14:104394799-104519004	0.875233	0.116885	3.4418	7.76303e-07	0.000738567
ALOX5	protein_coding	chr10:45869624-45941567	12.0747	1.79332	3.44161	1.59508e-05	0.00410061
FCER1A	protein_coding	chr1:159259504-159278014	33.484	9.04205	3.44096	0.00309948	0.0801119
SIGLEC9	protein_coding	chr19:51628165-51639908	2.66042	0.312219	3.42812	7.26376e-06	0.00252998
PF4	protein_coding	chr4:74846794-74847841	40.2714	2.15765	3.41679	0.000793913	0.0400567
F13A1	protein_coding	chr6:6144318-6321246	9.16699	0.704216	3.41161	0.00144606	0.0541512
CES1	protein_coding	chr16:55836763-55867249	0.900014	0.109536	3.40786	1.34613e-06	0.000968977
C1QA	protein_coding	chr1:22962999-22966101	21.2111	0.0231844	3.40753	5.55626e-06	0.00212534
EPHX2	protein_coding	chr8:27348296-27403081	1.08879	0.153225	3.38291	1.53786e-05	0.00406126
CTSH	protein_coding	chr15:79213400-79241916	7.23231	0.99678	3.3591	7.5642e-06	0.00257915
CTB-114C7.4	lincRNA	chr5:169735705-169739720	1.46176	0.0577611	3.35053	7.52456e-06	0.00257915
FCN1	protein_coding	chr9:137797736-137809809	73.0255	4.97135	3.34473	7.37218e-05	0.0110046
SCN9A	protein_coding	chr2:167051695-167232503	3.25513	0.388034	3.3433	8.557e-05	0.0123042
KCNC3	protein_coding	chr19:50815194-50836772	1.47451	0.242368	3.34175	0.000139987	0.0160229
XK	protein_coding	chrX:37545012-37591383	3.48542	0.566387	3.3396	0.000202111	0.0196721
F5	protein_coding	chr1:169483404-169555826	1.44683	0.182322	3.33956	4.67083e-06	0.00193971
SULF2	protein_coding	chr20:46285092-46415360	11.8078	1.41809	3.32864	2.75056e-05	0.00602001
GP1BA	protein_coding	chr17:4835592-4838325	21.2777	1.12254	3.30582	0.00432848	0.0951855
SECTM1	protein_coding	chr17:80278900-80291950	12.7224	0.849349	3.29889	3.79868e-05	0.00707166
TUBB1	protein_coding	chr20:57594309-57601709	10.4739	0.525904	3.27774	0.00178387	0.0610171
SLC37A2	protein_coding	chr11:124932963-124960208	1.01391	0.0837149	3.25142	2.82784e-05	0.00606618
MGST1	protein_coding	chr12:16500076-16762193	2.08362	1.14266	3.24865	0.000308763	0.0239269
ARHGEF11	protein_coding	chr1:156904632-157015162	5.71582	1.20418	3.24734	0.000285402	0.0231119
PLBD1	protein_coding	chr12:14656595-14721283	16.9264	1.38332	3.23479	0.000367455	0.0267474
MYO1E	protein_coding	chr15:59424633-59665099	2.23239	0.335828	3.23335	0.000174445	0.0178253
PLEKHG4B	protein_coding	chr5:92266-190087	1.36261	0.265464	3.23308	1.27259e-05	0.00362142
CXCL16	protein_coding	chr17:4636821-4643217	9.12123	0.953912	3.22853	0.000476053	0.0306467
C5AR1	protein_coding	chr19:47793280-47825323	24.6064	1.36931	3.21774	0.00102589	0.0459007
ASGR2	protein_coding	chr17:7004641-7019019	5.79951	0.746863	3.21736	2.91902e-05	0.00613534
FFAR2	protein_coding	chr19:35934809-35942669	2.4222	0.238419	3.20905	2.90086e-05	0.00613534
CD300LB	protein_coding	chr17:72517313-72527613	4.22763	0.367201	3.20875	0.00034242	0.0254981
SASH1	protein_coding	chr6:148593440-148873186	1.68619	0.258508	3.1989	0.0013273	0.0516132
MAOA	protein_coding	chrX:43514155-43606071	0.892616	0.094154	3.19427	4.32337e-05	0.00752917
NEO1	protein_coding	chr15:73344051-73597547	0.867215	0.121725	3.18269	7.7836e-05	0.0114084
GAS2L3	protein_coding	chr12:100967461-101022064	1.34778	0.144225	3.17344	9.6224e-07	0.000799202
MS4A7	protein_coding	chr11:60145955-60163424	4.05159	0.628182	3.17213	1.88798e-05	0.00453004
ARFGEF3	protein_coding	chr6:138483058-138665800	0.564998	0.0477347	3.16998	0.000578995	0.0337317
RAB6B	protein_coding	chr3:133543083-133614680	1.00604	0.159499	3.16759	3.02366e-05	0.00622303
WASF3	protein_coding	chr13:27131840-27263085	1.63099	0.0787081	3.15815	0.000435391	0.0294203
SALL4	protein_coding	chr20:50398870-50419059	0.590036	0.0250533	3.15757	4.66013e-06	0.00193971
CCDC149	protein_coding	chr4:24807739-24981826	0.724972	0.142339	3.15508	3.88913e-05	0.00711732
C8orf88	protein_coding	chr8:91970865-91997485	13.0488	4.65816	3.15207	0.00146416	0.0545767
RBP7	protein_coding	chr1:10057264-10076078	5.95828	0.357272	3.15183	5.46429e-05	0.00880594
GOLM1	protein_coding	chr9:88641061-88715088	10.3113	1.64518	3.14576	0.00401087	0.0919556
GIMAP4	protein_coding	chr7:150264365-150271043	13.4236	2.56343	3.14364	0.000450817	0.0296623
CUEDC1	protein_coding	chr17:55938604-56032684	1.01256	0.219579	3.13864	9.04995e-06	0.00286922
CD86	protein_coding	chr3:121774213-121839986	8.05839	0.941753	3.13348	0.00074892	0.0390016
IFI30	protein_coding	chr19:18283972-18288927	7.05764	0.845225	3.13311	0.000100244	0.0131996
LILRB4	protein_coding	chr19:55155340-55181810	6.06517	1.34254	3.12381	0.00275213	0.0751028
CHST15	protein_coding	chr10:125767182-125853123	6.25428	1.0311	3.12097	0.000187376	0.0187329
ATP9A	protein_coding	chr20:50213053-50385173	2.98886	1.59016	3.11544	0.000238201	0.0207669
ADCY9	protein_coding	chr16:4003388-4166186	1.74077	0.462777	3.1113	4.86208e-05	0.00820273
MUC6	protein_coding	chr11:1012821-1036706	0.539654	0.267099	3.09864	4.26445e-05	0.0074667
PTPRJ	protein_coding	chr11:48002110-48192393	7.8357	1.24695	3.09861	1.49556e-05	0.00401273
CALD1	protein_coding	chr7:134429003-134655479	0.889909	0.107259	3.09489	0.000432379	0.0294203
IQSEC2	protein_coding	chrX:53255010-53350526	1.06933	0.258024	3.05677	3.22904e-07	0.000435813
IL1R2	protein_coding	chr2:102608306-102645006	4.06154	0.272779	3.05047	0.000856773	0.0418591
C1QC	protein_coding	chr1:22970123-22974603	16.9248	0.0852027	3.0492	0.000116124	0.0145232
SPR	protein_coding	chr2:73114489-73119287	1.06194	0.164529	3.04413	1.25409e-07	0.000292014
TACSTD2	protein_coding	chr1:59041095-59043445	3.00986	0.104273	3.03906	8.06213e-05	0.0116584
WNT2B	protein_coding	chr1:113009163-113072787	0.201347	0.0579653	3.03286	2.83612e-06	0.00141335
FZD2	protein_coding	chr17:42634827-42636938	1.21443	0.184975	3.02629	6.58559e-06	0.00237023
LINC01694	lincRNA	chr21:47013568-47022970	0.645925	0.124541	3.02481	9.50839e-05	0.0129908
CD40	protein_coding	chr20:44746911-44758502	3.87367	0.831578	3.02105	4.85112e-06	0.00196422
COL27A1	protein_coding	chr9:116917840-117074791	0.722979	0.0987593	3.01763	0.000181856	0.0182374
SH3BGRL2	protein_coding	chr6:80341000-80413376	2.88762	0.503045	3.01353	0.00241545	0.0716267
ABCC3	protein_coding	chr17:48712138-48769613	1.38003	0.0953377	3.01177	0.000980609	0.0447625
WLS	protein_coding	chr1:68564156-68698803	0.564436	0.0601768	3.00829	3.42531e-05	0.00660432
FCAR	protein_coding	chr19:55385704-55401838	14.433	1.73661	3.00388	0.000506632	0.0316811
CDH5	protein_coding	chr16:66400525-66438689	0.334622	0.0605536	2.9957	8.95977e-06	0.00286922
PRKG1	protein_coding	chr10:52751118-54058110	0.714723	0.0887691	2.99397	0.000300181	0.0236558
SHROOM4	protein_coding	chrX:50334647-50557302	0.917357	0.214358	2.9907	0.00176834	0.0610171
FAM20A	protein_coding	chr17:66531254-66597530	0.948453	0.0924572	2.98895	0.000163028	0.0171585
ST14	protein_coding	chr11:130029457-130080271	6.45321	1.63564	2.98818	0.00267785	0.0745837
MS4A14	protein_coding	chr11:60146003-60185229	0.602144	0.134823	2.97549	4.73653e-05	0.00807503
CAMK1	protein_coding	chr3:9799026-9811676	6.31074	0.930468	2.96585	9.90581e-06	0.00299872
SIGLEC7	protein_coding	chr19:51645556-51656783	3.29289	0.234783	2.9614	0.00036	0.0262637
TMEM150C	protein_coding	chr4:83404323-83483510	1.49194	0.162582	2.95786	0.000521574	0.0320254
CCR1	protein_coding	chr3:46243200-46249887	14.0035	1.22416	2.95431	0.00177283	0.0610171
HLA-DQB2	protein_coding	chr6:32723875-32731311	2.46249	0.904551	2.95292	4.14027e-05	0.00729751
FMN1	protein_coding	chr15:33057746-33486934	1.19495	0.202811	2.95221	0.000284723	0.0231119
STXBP1	protein_coding	chr9:130341649-130458306	1.07975	0.251712	2.92924	8.04434e-05	0.0116584
ABI3	protein_coding	chr17:47287589-47300587	7.57713	1.56529	2.91779	0.000116689	0.0145377
CYBB	protein_coding	chrX:37639264-37672714	51.3932	11.8144	2.91748	0.00130775	0.051037
PTPDC1	protein_coding	chr9:96793076-96872138	0.773176	0.163733	2.91724	2.43198e-07	0.00036568
LILRA5	protein_coding	chr19:54818353-54824409	19.5663	1.49468	2.91397	0.00166947	0.0584674
IL13RA1	protein_coding	chrX:117861535-117928502	5.65785	0.851851	2.91385	0.000161857	0.0171366
CA1	protein_coding	chr8:86239837-86291243	3.71497	0.794842	2.90891	0.00270173	0.0746608
KIAA1217	protein_coding	chr10:23983675-24836777	0.519744	0.123504	2.90793	0.000772354	0.0397112
CLEC4E	protein_coding	chr12:8685901-8693559	3.68769	0.335133	2.90431	0.00105845	0.0461496
MS4A6A	protein_coding	chr11:59939487-59952139	8.1962	1.11108	2.90431	3.14343e-05	0.00636388
LINC01133	lincRNA	chr1:159931008-159954540	0.640637	0.0311859	2.90229	7.1497e-06	0.00251731
NUP62CL	protein_coding	chrX:106366657-106449663	3.67275	0.607373	2.89889	0.000527496	0.0322389
FLVCR2	protein_coding	chr14:76044960-76129557	2.00862	0.168742	2.89834	0.000160562	0.0171366
FGL2	protein_coding	chr7:76822688-76829165	26.3922	2.30782	2.89171	0.00147644	0.054845
C1QB	protein_coding	chr1:22979255-22988031	20.4595	0.195169	2.89007	0.00166962	0.0584674
MYL9	protein_coding	chr20:35169887-35179850	7.0584	0.525631	2.88518	0.00234767	0.0707403
LGALS3	protein_coding	chr14:55590828-55612131	11.205	1.09227	2.8791	0.000104374	0.0134668
C17orf100	protein_coding	chr17:6555038-6596521	1.67929	0.428807	2.87888	1.30154e-05	0.00366605
GNAZ	protein_coding	chr22:23412547-23467224	4.30694	0.337415	2.8725	0.000126567	0.0152407
LDLRAD3	protein_coding	chr11:35965531-36253686	3.21815	0.602866	2.86894	0.00197297	0.0643591
PCDH12	protein_coding	chr5:141323150-141349306	0.343523	0.0692738	2.86574	1.67979e-05	0.00418552
IGF2BP1	protein_coding	chr17:47074774-47133012	3.34836	0.0520258	2.85018	0.00243817	0.0718858
AASS	protein_coding	chr7:121715701-121784334	2.116	0.588026	2.84951	0.000433762	0.0294203
NCF2	protein_coding	chr1:183524698-183560011	32.3338	2.93959	2.84387	7.50739e-05	0.011155
LHFP	protein_coding	chr13:39917029-40177665	5.00678	1.6183	2.83304	0.000242778	0.0209151
KALRN	protein_coding	chr3:123798870-124445172	0.688341	0.12424	2.83237	0.000194677	0.0192844
GLT1D1	protein_coding	chr12:129337972-129469513	2.67463	0.324641	2.82234	0.000253038	0.02149
BICC1	protein_coding	chr10:60272900-60591197	1.5409	0.178711	2.82176	0.00105857	0.0461496
RP11-362F19.1	lincRNA	chr4:142240604-142253772	0.519363	0.064195	2.8212	0.0011178	0.0471455
IL32	protein_coding	chr16:3115298-3132193	0.513321	0.0322155	2.82038	2.37246e-05	0.00548919
MTUS1	protein_coding	chr8:17501304-17658426	0.528953	0.116558	2.81431	0.00228254	0.0698828
RAG2	protein_coding	chr11:36597124-36619829	5.17419	0.275542	2.81109	0.00191916	0.0633694
PKP2	protein_coding	chr12:32943679-33049774	1.53849	0.339008	2.80065	0.00282681	0.0762414
MAGI3	protein_coding	chr1:113933371-114228545	2.20679	0.363247	2.79896	5.9808e-06	0.00217674
CTGF	protein_coding	chr6:132269316-132272513	10.4748	1.44172	2.78903	0.00153441	0.0561548
CDA	protein_coding	chr1:20915441-20945401	5.71244	1.08221	2.78697	0.000342379	0.0254981
CD247	protein_coding	chr1:167399877-167487847	0.90806	0.109558	2.78512	0.000117296	0.0145572
OLFML2B	protein_coding	chr1:161952982-161993644	2.11473	0.182204	2.78496	0.0019465	0.0638168
RASIP1	protein_coding	chr19:49223844-49243978	0.571891	0.073473	2.7833	5.07884e-05	0.00839355
TBC1D8	protein_coding	chr2:101624079-101869328	2.18355	0.404397	2.78102	2.72962e-05	0.00601483
LILRB3	protein_coding	chr19:54720147-54727378	1.84231	0.126845	2.78043	0.000666074	0.0369967
MARCH1	protein_coding	chr4:164445450-165305202	1.34617	0.3002	2.77569	0.00168266	0.0587967
DYNC1I1	protein_coding	chr7:95401818-95739634	0.405295	0.070691	2.77335	5.18126e-05	0.00846662
LILRB1	protein_coding	chr19:55128612-55148979	4.09078	0.652341	2.77294	1.71007e-05	0.00422844
FAM198B	protein_coding	chr4:159045626-159094470	2.85246	0.471719	2.76131	3.29381e-05	0.00654559
APOBEC3A	protein_coding	chr22:39348746-39388783	9.22451	1.11447	2.76113	0.00242366	0.071696
RUNX1T1	protein_coding	chr8:92967195-93115514	0.931468	0.0392076	2.75961	0.00283639	0.0763091
TMEM176B	protein_coding	chr7:150488373-150498448	4.2262	0.331878	2.75826	0.00137317	0.05227
PTGR1	protein_coding	chr9:114312002-114362135	2.99337	0.5645	2.75248	0.000267162	0.0220201
HLA-DQA2	protein_coding	chr6:32709119-32714992	3.5767	0.948581	2.7503	0.000569078	0.0336972
LAMB3	protein_coding	chr1:209788215-209825811	1.86511	0.367575	2.74464	0.000624525	0.0355208
NUDT11	protein_coding	chrX:51232863-51239448	3.71406	1.1903	2.74409	0.00330196	0.0829268
CHRM3	protein_coding	chr1:239549865-240078752	2.11163	0.486232	2.73681	3.22728e-05	0.00645297
PDE5A	protein_coding	chr4:120415550-120550146	1.288	0.043158	2.73097	0.00247297	0.0724928
CORO2B	protein_coding	chr15:68871308-69020145	1.35651	0.333147	2.72903	0.00377078	0.0891555
APOL4	protein_coding	chr22:36585172-36600886	0.707973	0.088147	2.72533	0.000626153	0.0355208
MYCT1	protein_coding	chr6:153019030-153045702	8.30633	1.72118	2.72409	0.00306506	0.0796235
PTGFRN	protein_coding	chr1:117452679-117532980	0.637472	0.140583	2.7227	0.000765237	0.0395543
BATF3	protein_coding	chr1:212859760-212873327	1.30811	0.338423	2.71322	5.6401e-06	0.00212534
EML5	protein_coding	chr14:89078775-89259096	0.427603	0.0766908	2.71131	0.000165955	0.0173407
SGMS2	protein_coding	chr4:108745719-108836203	1.93782	1.02497	2.70558	0.00404479	0.0919556
SNX25	protein_coding	chr4:186125391-186291339	1.51908	0.321413	2.70391	0.000263985	0.0218696
NKX2-3	protein_coding	chr10:101292690-101296281	1.47603	0.115128	2.70259	0.00027027	0.0222197
KNDC1	protein_coding	chr10:134973951-135039916	0.619086	0.0238579	2.69806	0.000208272	0.019784
FRMD4A	protein_coding	chr10:13685706-14504141	0.399981	0.118333	2.69625	9.40363e-05	0.0129675
NECAB1	protein_coding	chr8:91803778-91971636	1.06889	0.216983	2.69293	0.00201072	0.0650013
ZFYVE9	protein_coding	chr1:52607766-52812358	2.14736	0.285024	2.69233	0.00104319	0.0461388
TCEA3	protein_coding	chr1:23707554-23751233	1.3321	0.0973481	2.6907	0.000399809	0.0282653
AC187652.1	protein_coding	chr7:302918-304070	2.25037	0.0420602	2.68905	7.98032e-07	0.000738567
SELP	protein_coding	chr1:169558087-169599431	6.86712	0.728193	2.68836	0.00348182	0.0852479
FCRL1	protein_coding	chr1:157764193-157789895	1.63967	0.214001	2.68117	0.0021735	0.0679655
RP4-647C14.2	antisense	chr14:73709359-73712687	0.795301	0.205015	2.67756	0.000122751	0.0149685
LAMA5	protein_coding	chr20:60883011-60942368	2.08658	0.340638	2.67706	0.000198421	0.0194765
RP11-4B16.4	antisense	chr18:74824558-74827682	1.01968	0.135537	2.66831	0.000158873	0.0171366
SRGAP3	protein_coding	chr3:9022275-9404737	0.925338	0.329915	2.666	0.000224292	0.0203641
SMPDL3A	protein_coding	chr6:123110194-123130865	1.77842	0.114631	2.66591	0.000263845	0.0218696
NRXN2	protein_coding	chr11:64373646-64490660	9.77065	1.25301	2.66497	0.000801407	0.0402468
TP73	protein_coding	chr1:3569084-3652765	0.331849	0.114717	2.66374	0.000329288	0.0248053
TEAD4	protein_coding	chr12:3068496-3149839	1.48128	0.192846	2.66317	0.000469091	0.0304521
LRRC25	protein_coding	chr19:18501954-18508427	13.3704	1.83645	2.66309	0.000517382	0.0318613
NEIL1	protein_coding	chr15:75639296-75649455	4.05172	0.652745	2.6563	0.00303101	0.0791596
TEK	protein_coding	chr9:27109139-27230173	1.68425	0.299697	2.65335	0.00130729	0.051037
PBK	protein_coding	chr8:27667137-27695612	1.39588	0.289124	2.64964	0.000110803	0.0140201
MYO7A	protein_coding	chr11:76839310-76926284	0.749119	0.0809313	2.64879	0.000429917	0.0294203
PAPLN	protein_coding	chr14:73704205-73741348	0.532627	0.0899796	2.64606	0.000505772	0.0316811
ARPIN	protein_coding	chr15:90438238-90456188	1.35491	0.274795	2.63707	6.08165e-05	0.00942568
LGMN	protein_coding	chr14:93170152-93215047	5.10947	2.26247	2.63149	0.00115346	0.0482724
CCDC68	protein_coding	chr18:52568740-52626739	1.16708	0.0927944	2.62914	0.000516259	0.0318613
VSIG4	protein_coding	chrX:65241580-65259967	5.95896	0.168408	2.6224	0.00410188	0.0925198
SEZ6L2	protein_coding	chr16:29882480-29910868	0.594593	0.0995701	2.6218	0.000439543	0.0294203
GRIP1	protein_coding	chr12:66741211-67197966	0.79379	0.194329	2.61913	0.000468455	0.0304521
KCNQ4	protein_coding	chr1:41249684-41306124	1.30692	0.196926	2.6181	0.000983169	0.0447625
SMC1B	protein_coding	chr22:45739944-45809500	0.526541	0.168871	2.61651	0.000102536	0.0133388
CTB-61M7.2	lincRNA	chr19:55402039-55402786	4.27575	0.529823	2.61041	0.000473495	0.0305527
NXF3	protein_coding	chrX:102330738-102348053	0.853276	0.129407	2.60383	0.00043854	0.0294203
RP11-672A2.5	lincRNA	chr11:76318897-76341471	0.748816	0.183388	2.6027	5.86167e-05	0.00930809
CMKLR1	protein_coding	chr12:108681821-108733118	0.718692	0.164871	2.59811	0.00104931	0.0461388
ADCY2	protein_coding	chr5:7396321-7830194	0.13893	0.0195724	2.59081	0.00030059	0.0236558
DGKI	protein_coding	chr7:137065783-137531838	0.15478	0.0501368	2.59068	0.000663647	0.0369905
CA3	protein_coding	chr8:86285665-86361269	0.777617	0.138097	2.59065	0.000316354	0.0242747
RP11-342I1.2	antisense	chr4:140477953-140478797	2.9309	0.931332	2.58621	0.000266052	0.0219846
LRCH2	protein_coding	chrX:114345179-114468635	0.758154	0.152033	2.5807	0.00202019	0.0651357
DAGLA	protein_coding	chr11:61447905-61514473	1.27086	0.244866	2.57968	0.000484168	0.0308724
TREML1	protein_coding	chr6:41117080-41122075	3.40045	0.41936	2.57775	0.00268393	0.0746247
AQP1	protein_coding	chr7:30951309-30965131	1.27622	0.19097	2.57452	0.00123214	0.049471
HFE	protein_coding	chr6:26087509-26098571	0.397995	0.0590741	2.57347	0.00022082	0.0203641
LANCL3	protein_coding	chrX:37430822-37543716	0.143461	0.0376545	2.573	0.000239135	0.0207669
SPTB	protein_coding	chr14:65213001-65346601	4.37448	0.467059	2.57084	0.0010318	0.0459043
SEZ6L	protein_coding	chr22:26565440-26779563	0.673842	0.118654	2.56961	0.000318464	0.0242747
GAS6	protein_coding	chr13:114523522-114567040	1.63405	0.407828	2.56923	0.00175521	0.0608725
SPX	protein_coding	chr12:21679241-21690311	0.654137	0.0774255	2.56917	0.000458298	0.0299903
HEYL	protein_coding	chr1:40089825-40105617	1.13158	0.168182	2.56712	0.000291163	0.0232872
CLCN4	protein_coding	chrX:10124985-10205700	1.06585	0.189626	2.56002	0.00429703	0.0948157
PDK4	protein_coding	chr7:95212811-95225803	0.63702	0.184182	2.55867	0.000622863	0.0355207
S100A9	protein_coding	chr1:153330330-153333503	406.602	53.3061	2.55727	0.000327699	0.0247432
SAMD11	protein_coding	chr1:859308-879961	1.61047	0.211353	2.55691	0.00356503	0.0859855
SH2D4B	protein_coding	chr10:82297658-82406316	2.55879	0.191747	2.53865	0.00227397	0.0698828
SCD5	protein_coding	chr4:83550692-83720010	1.09966	0.371759	2.53552	0.000217649	0.0202589
OPLAH	protein_coding	chr8:145106167-145118868	1.11518	0.177408	2.53535	0.000469116	0.0304521
KIAA0513	protein_coding	chr16:85061357-85127836	3.57692	0.699257	2.53167	1.49314e-06	0.00100762
CMTM5	protein_coding	chr14:23846017-23848981	2.09031	0.101541	2.52761	0.00195999	0.0641065
SLC26A11	protein_coding	chr17:78193498-78227299	1.35319	0.18983	2.52369	0.00127581	0.0506004
PLXNA2	protein_coding	chr1:208195587-208417665	1.13402	0.230352	2.51417	0.000376591	0.0272898
PTGIR	protein_coding	chr19:47123725-47128375	2.37154	0.775325	2.5138	0.000164163	0.017209
LINC01801	lincRNA	chr19:35279486-35323773	0.753493	0.16928	2.5082	0.000203873	0.0196871
LIMCH1	protein_coding	chr4:41361624-41702061	0.840444	0.160175	2.50296	0.00344934	0.0849395
PRUNE2	protein_coding	chr9:79226292-79521003	0.520691	0.156122	2.50282	0.000684707	0.0374646
TUB	protein_coding	chr11:8040791-8127659	0.861744	0.14349	2.50103	0.00252166	0.07293
FGD2	protein_coding	chr6:36973422-36996846	4.27684	0.848376	2.50059	0.00138025	0.0524756
TMEM176A	protein_coding	chr7:150497491-150502208	0.784757	0.197224	2.49932	0.000287475	0.0232089
ANKRD18B	protein_coding	chr9:33524392-33573007	0.742358	0.0354328	2.49916	0.0023035	0.0703026
POMC	protein_coding	chr2:25383722-25391772	6.58451	4.75725	2.49622	0.000522024	0.0320254
PLS3	protein_coding	chrX:114795501-114885181	3.01804	1.0965	2.49232	0.00334055	0.0833002
RBM47	protein_coding	chr4:40425284-40632892	5.71891	1.50359	2.49172	0.000161748	0.0171366
PLEKHG1	protein_coding	chr6:150921019-151164801	3.14866	1.03293	2.48804	2.95478e-05	0.00613534
LRRC2	protein_coding	chr3:46556913-46621589	0.440648	0.084219	2.48526	0.000568152	0.0336972
SLC2A14	protein_coding	chr12:7965108-8043744	0.910613	0.290438	2.47798	0.00109543	0.0467231
LOXHD1	protein_coding	chr18:44056935-44236996	0.705999	0.21984	2.4773	0.00142776	0.0537767
PTPRG	protein_coding	chr3:61547243-62283288	0.227987	0.0405966	2.47519	0.00240662	0.0715843
COL6A6	protein_coding	chr3:130279178-130396999	0.615742	0.104686	2.47429	0.000811674	0.0404488
GNGT2	protein_coding	chr17:47280153-47287936	2.18037	0.408624	2.47281	0.00253355	0.0731433
IRX3	protein_coding	chr16:54317216-54320675	0.845612	0.0423924	2.45403	0.000828038	0.0410119
CLMN	protein_coding	chr14:95648277-95786243	0.914087	0.167468	2.45358	0.000251345	0.0214817
ZNF311	protein_coding	chr6:28962562-28973093	0.418969	0.123757	2.44606	5.91118e-05	0.00930809
METTL7B	protein_coding	chr12:56075330-56078395	3.34633	0.405127	2.44277	0.00273736	0.0749524
TRNP1	protein_coding	chr1:27320198-27327389	1.19726	0.309574	2.44259	0.00102789	0.0459007
SMARCD3	protein_coding	chr7:150935850-150974982	1.35328	0.390591	2.44014	0.00107154	0.0463096
NCAM1	protein_coding	chr11:112831969-113149158	0.243025	0.030904	2.43889	0.00119629	0.0491755
KCNMA1	protein_coding	chr10:78629359-79398127	0.2946	0.0554811	2.4359	0.00348809	0.0852727
CXorf57	protein_coding	chrX:105855160-105922672	0.16609	0.018121	2.43488	2.94164e-05	0.00613534
GP5	protein_coding	chr3:194115550-194119083	2.20149	0.134017	2.43486	0.00198038	0.064524
NUAK2	protein_coding	chr1:205271187-205290919	3.76683	0.991063	2.43284	0.000176138	0.0179328
ID1	protein_coding	chr20:30193086-30194318	32.3647	6.94817	2.42843	0.000204865	0.0196871
NDN	protein_coding	chr15:23930547-23932477	3.0286	0.773039	2.42541	0.00457403	0.0980639
RAB39A	protein_coding	chr11:107799229-107834208	0.630047	0.104261	2.42232	0.000140505	0.0160255
RASSF4	protein_coding	chr10:45454855-45491339	3.04426	0.481592	2.41966	0.0013656	0.052225
TRPC6	protein_coding	chr11:101322295-101743293	1.10267	0.0930316	2.41844	0.00383982	0.089958
MAP3K21	protein_coding	chr1:233463514-233520894	1.38951	0.672105	2.41645	0.00197254	0.0643591
FGR	protein_coding	chr1:27938575-27961788	28.1586	3.73695	2.41324	5.70834e-06	0.00212534
GPRASP2	protein_coding	chrX:101967104-101972661	1.44707	0.346809	2.40634	0.000861918	0.0420471
NFAM1	protein_coding	chr22:42776416-42828401	7.46428	0.97302	2.40555	1.46722e-06	0.00100762
ADAP2	protein_coding	chr17:29233362-29286340	4.31915	0.495061	2.40312	0.00321624	0.0818385
MIPOL1	protein_coding	chr14:37667118-38021566	0.259364	0.0523619	2.39969	0.000699914	0.0376382
WDR17	protein_coding	chr4:176986985-177103969	1.09281	0.274181	2.39477	0.00217234	0.0679655
RGPD2	protein_coding	chr2:88055474-88125471	0.209268	0.00857457	2.39375	0.000214212	0.0201046
LILRA1	protein_coding	chr19:55105047-55113555	6.71402	1.11461	2.39284	0.00275189	0.0751028
TRGV9	TR_V_gene	chr7:38356618-38358462	3.37158	0.122776	2.38564	0.000870065	0.0422536
RP11-728F11.4	antisense	chr11:117704434-117709657	1.0975	0.109285	2.38279	0.000210485	0.0198776
IGSF3	protein_coding	chr1:117117021-117210377	0.389409	0.0586505	2.38114	0.00125248	0.0499122
MAP3K15	protein_coding	chrX:19378174-19533379	0.812377	0.113191	2.37942	0.00259228	0.0732949
TRIM7	protein_coding	chr5:180620924-180632293	0.160541	0.0122371	2.37304	6.0428e-05	0.0094105
MPPED2	protein_coding	chr11:30406040-30608419	0.798076	0.317946	2.369	0.00144919	0.0542059
CSF1R	protein_coding	chr5:149432854-149492935	23.5436	5.5986	2.36644	0.00217536	0.0679655
PRDM5	protein_coding	chr4:121606074-121844025	0.317236	0.0442142	2.36494	0.00345759	0.0849758
LONRF3	protein_coding	chrX:118108577-118152318	4.20964	0.799759	2.35885	0.00305351	0.0794452
KAZALD1	protein_coding	chr10:102821598-102827888	1.91523	0.464137	2.3577	0.00220217	0.0684573
KCNE1	protein_coding	chr21:35818986-35884573	0.522212	0.0744386	2.35461	0.000575384	0.0336972
NHS	protein_coding	chrX:17393543-17754114	0.416463	0.0441483	2.35441	0.00190051	0.063129
FAT3	protein_coding	chr11:92085262-92629636	0.191492	0.0847337	2.34881	0.00278635	0.0757812
LYPD5	protein_coding	chr19:44300081-44331358	0.293892	0.102411	2.34728	0.000405954	0.0284624
RP11-384P7.7	lincRNA	chr9:33697457-33700984	0.639185	0.182602	2.34541	0.00405102	0.0919556
FJX1	protein_coding	chr11:35639967-35642416	0.898353	0.172779	2.34493	0.00195483	0.0640253
ZNF214	protein_coding	chr11:7020549-7041599	0.356083	0.0177858	2.34488	0.000198044	0.0194765
CDC42BPB	protein_coding	chr14:103398716-103523799	6.98029	0.838949	2.34187	0.000578751	0.0337317
CD300C	protein_coding	chr17:72537247-72542282	7.09928	0.999445	2.33	0.000873493	0.0422613
C19orf35	protein_coding	chr19:2274621-2282175	1.08083	0.131885	2.32318	0.00124894	0.0498835
LYVE1	protein_coding	chr11:10578513-10633236	2.97536	0.0321917	2.32306	0.00186024	0.0627023
DOCK1	protein_coding	chr10:128593978-129250781	11.0576	3.72562	2.32149	0.000777745	0.039877
OLFM1	protein_coding	chr9:137967268-138013025	0.81579	0.0309589	2.30991	0.00246341	0.0723433
CXCR2	protein_coding	chr2:218990012-219001976	0.773921	0.143739	2.3076	0.00277555	0.0755509
NAV3	protein_coding	chr12:77718421-78606788	0.116632	0.0227546	2.30324	0.00110106	0.0468053
KLHL32	protein_coding	chr6:97372496-97588630	0.262231	0.0792742	2.30309	0.000342312	0.0254981
SNCAIP	protein_coding	chr5:121647049-121799914	0.326603	0.0584475	2.29943	0.00206661	0.0659523
NOTCH3	protein_coding	chr19:15269849-15311792	0.519604	0.0661492	2.29941	0.00256535	0.073225
PLSCR4	protein_coding	chr3:145910126-145968966	1.0601	0.370295	2.2965	0.00164807	0.058153
DRAXIN	protein_coding	chr1:11751786-11785914	0.162909	0.10953	2.29572	0.000925877	0.0435536
MRVI1	protein_coding	chr11:10594638-10715535	0.529573	0.213272	2.29462	0.000786564	0.0400005
PLEKHH2	protein_coding	chr2:43864412-43995126	0.245295	0.0485665	2.29113	0.00285465	0.0763849
ENAH	protein_coding	chr1:225674537-225840844	0.504524	0.108537	2.28798	0.00439013	0.0959549
KCNQ1	protein_coding	chr11:2465914-2870339	4.81268	1.10074	2.28722	0.00108886	0.0466159
VNN2	protein_coding	chr6:133065009-133084598	3.84786	1.00513	2.28528	0.000765637	0.0395543
C10orf25	antisense	chr10:45493146-45496336	1.56647	0.527142	2.2804	0.000428269	0.0294203
FRAS1	protein_coding	chr4:78978724-79465423	0.266655	0.104005	2.27137	0.000871475	0.0422587
SEPT4	protein_coding	chr17:56597611-56618179	0.460914	0.107992	2.27063	0.00266944	0.0745652
TLR5	protein_coding	chr1:223282748-223316624	0.26949	0.0154126	2.26785	0.00105661	0.0461496
MAP2	protein_coding	chr2:210288782-210598842	0.166011	0.0318506	2.26733	0.00127782	0.0506004
SRRM3	protein_coding	chr7:75831218-75916605	0.292434	0.0292351	2.26728	0.000962216	0.0441761
NLRC4	protein_coding	chr2:32449522-32490923	1.1644	0.264926	2.2667	0.00435581	0.0956565
MYO16	protein_coding	chr13:109248500-109860355	0.252734	0.0544273	2.26579	0.0026034	0.0734358
ENTPD1	protein_coding	chr10:97471536-97629452	1.63513	0.297758	2.26504	0.000202235	0.0196721
RP11-413N10.3	lincRNA	chr11:6843173-6948108	0.365524	0.122398	2.26436	0.0015809	0.0569617
ITSN1	protein_coding	chr21:35014706-35272165	1.5613	0.350092	2.2626	4.38212e-08	0.000177432
FCGBP	protein_coding	chr19:40353963-40440533	0.290868	0.0321811	2.2625	0.0040429	0.0919556
CRMP1	protein_coding	chr4:5749811-5894785	0.63781	0.0952274	2.2614	0.00437599	0.0959046
RAD9B	protein_coding	chr12:110939460-110969891	0.70273	0.179412	2.25987	0.000155757	0.0170928
PRLR	protein_coding	chr5:35048861-35230691	0.170534	0.101016	2.25939	0.00230697	0.0703026
C16orf45	protein_coding	chr16:15528152-15718885	1.6296	0.427269	2.259	0.000253064	0.02149
SLC16A9	protein_coding	chr10:61410519-61495760	0.951228	0.213837	2.25797	0.00406746	0.0920065
CATIP	protein_coding	chr2:219221579-219232822	0.581402	0.127192	2.25729	0.00144458	0.0541512
RP11-295K3.1	protein_coding	chr11:1756051-1785184	0.751907	0.215449	2.25687	0.00241689	0.0716267
ADAM12	protein_coding	chr10:127700950-128077024	0.140747	0.0466899	2.25538	0.000788102	0.0400005
ENPP1	protein_coding	chr6:132129156-132216295	0.183875	0.0300357	2.25137	0.000734669	0.038695
CTD-2366F13.1	antisense	chr5:52405672-52410956	0.414577	0.101865	2.24857	0.000471211	0.0305269
NOD2	protein_coding	chr16:50727514-50766988	2.558	0.443735	2.24067	9.38134e-05	0.0129675
KCNH3	protein_coding	chr12:49932940-49952091	1.75389	0.358394	2.23964	0.000517322	0.0318613
ANXA5	protein_coding	chr4:122589110-122618268	41.384	11.7143	2.23962	7.80306e-06	0.00261148
KCNJ11	protein_coding	chr11:17407406-17410878	0.346794	0.0435792	2.23119	0.00251542	0.0728548
SSPN	protein_coding	chr12:26274924-26452223	0.254059	0.0710515	2.22931	0.00214076	0.0675863
FAM20C	protein_coding	chr7:192969-300711	3.34769	1.05847	2.22451	0.000163152	0.0171585
SLC2A10	protein_coding	chr20:45338126-45364986	0.783042	0.330029	2.22395	0.00128629	0.0506881
NRG1	protein_coding	chr8:31496902-32625477	0.179707	0.0125136	2.21754	0.00181394	0.0615258
KCND3	protein_coding	chr1:112313284-112531777	0.44675	0.0169595	2.21733	0.00188787	0.0630523
NID1	protein_coding	chr1:236139130-236228462	6.88173	1.49188	2.21678	0.000154859	0.0170928
RIN1	protein_coding	chr11:66097713-66104311	2.05162	0.50577	2.21524	0.000297776	0.0236411
ID2-AS1	antisense	chr2:8806766-8821993	1.06071	0.29055	2.21504	0.00102877	0.0459007
SPATA18	protein_coding	chr4:52917497-52963458	0.356909	0.0209204	2.21082	0.0023651	0.0709099
TUBAL3	protein_coding	chr10:5435061-5446793	1.05198	0.0859287	2.19674	0.00328771	0.0828606
RP11-102N12.3	lincRNA	chr4:141677682-141679075	1.31651	0.0674247	2.19393	0.00103452	0.0459043
DCBLD1	protein_coding	chr6:117774980-117891021	0.400789	0.147885	2.19366	0.00239644	0.0714784
TIMD4	protein_coding	chr5:156346293-156390266	1.82331	0.0427219	2.19091	0.000850559	0.0416813
STARD13	protein_coding	chr13:33677272-33924767	0.678387	0.238917	2.19046	5.87139e-05	0.00930809
B4GALNT3	protein_coding	chr12:569530-672675	0.243099	0.0429722	2.18631	0.00151817	0.0559605
L1TD1	protein_coding	chr1:62660503-62678000	0.764379	0.0346003	2.1863	0.0020957	0.0666182
C10orf128	protein_coding	chr10:50362770-50396630	1.85322	0.814528	2.18615	0.000659122	0.0368108
COLQ	protein_coding	chr3:15491640-15563258	0.915086	0.442083	2.18405	0.00102518	0.0459007
LILRB2	protein_coding	chr19:54777675-54785039	19.6111	2.96857	2.18025	2.5152e-05	0.00569736
LINC01163	lincRNA	chr10:129979296-130115990	0.280175	0.00354229	2.16739	3.42229e-05	0.00660432
DIRC3	protein_coding	chr2:218148742-218621316	0.545045	0.266982	2.16674	0.00161827	0.0575053
ATP2B2	protein_coding	chr3:10365707-10749716	0.174257	0.0571097	2.16636	0.00345519	0.0849758
PAPSS2	protein_coding	chr10:89419370-89507462	2.16632	0.493617	2.1582	0.00171264	0.0596514
CGNL1	protein_coding	chr15:57668165-57842925	0.550081	0.197091	2.15365	0.00251663	0.0728548
RP11-501J20.5	antisense	chr10:118999111-119001434	2.3739	0.491849	2.15319	0.00237807	0.0710612
EVA1C	protein_coding	chr21:33784314-33887707	0.931324	0.295674	2.15149	0.00317953	0.0813518
FAXDC2	protein_coding	chr5:154198051-154238812	1.95642	0.399401	2.14873	0.000576107	0.0336972
VDR	protein_coding	chr12:48235320-48336831	3.79812	0.693115	2.14766	4.06157e-05	0.00726863
CD68	protein_coding	chr17:7482785-7485431	0.801931	0.180525	2.14408	0.00106469	0.046292
PRR5L	protein_coding	chr11:36317838-36486754	1.61517	0.961074	2.14289	0.00105633	0.0461496
CHMP4C	protein_coding	chr8:82644669-82671750	1.11681	0.275534	2.14229	0.00337825	0.083789
APBB2	protein_coding	chr4:40812044-41218731	0.871286	0.259376	2.14071	0.00374519	0.0886151
CNR1	protein_coding	chr6:88849583-88876078	0.236645	0.0224323	2.1319	0.00235402	0.0707999
NES	protein_coding	chr1:156638555-156647189	0.309012	0.0602563	2.13122	0.00189553	0.063129
TYMP	protein_coding	chr22:50964181-50968485	23.5636	3.86157	2.12375	0.000209347	0.019828
EVPL	protein_coding	chr17:74000583-74023533	2.98575	1.03491	2.12307	0.0036625	0.0876836
RP11-159H10.3	antisense	chr8:70746346-70767206	0.407255	0.0383077	2.12227	0.00138454	0.0525152
LRFN3	protein_coding	chr19:36426260-36436669	0.799932	0.233957	2.12081	0.00365464	0.0875599
POLN	protein_coding	chr4:2073645-2243848	0.392701	0.144299	2.1149	0.00232529	0.0704685
SIRPB1	protein_coding	chr20:1544167-1600707	2.96358	0.704373	2.11346	0.00117508	0.0486122
SYNM	protein_coding	chr15:99638420-99675798	1.21995	0.607211	2.10674	0.00155726	0.0567245
FPR3	protein_coding	chr19:52298416-52329442	0.273881	0.0360722	2.10404	0.000434945	0.0294203
JAML	protein_coding	chr11:118064455-118095809	7.1235	2.82513	2.1028	0.0039724	0.0913229
RP11-15A1.7	antisense	chr19:44501048-44506988	0.332111	0.0871235	2.10047	0.000692273	0.0376163
TIGD7	protein_coding	chr16:3348832-3355729	1.23283	0.377407	2.09373	1.55727e-05	0.0040633
KCTD12	protein_coding	chr13:77454301-77460525	20.6027	4.04484	2.0891	0.000127585	0.0152798
CPNE5	protein_coding	chr6:36708552-36807778	0.369318	0.149978	2.08798	0.0028018	0.0757988
CRYM	protein_coding	chr16:21250195-21314404	0.374039	0.0666838	2.08368	0.00136829	0.0522335
LINC00278	lincRNA	chrY:2870953-2970313	1.90929	0.363776	2.08301	0.00233215	0.0704883
RP11-613M10.9	protein_coding	chr9:37588410-38068684	0.408407	0.102421	2.0813	0.000523982	0.0320847
ANO2	protein_coding	chr12:5641035-6055398	0.241199	0.048979	2.08111	0.00173808	0.0603427
NINL	protein_coding	chr20:25433341-25566153	0.671008	0.05853	2.08014	0.00366595	0.0877012
SLC24A4	protein_coding	chr14:92788925-92967827	1.14962	0.278215	2.07899	9.36088e-05	0.0129675
AC074289.1	antisense	chr2:64370373-64479993	0.61214	0.174043	2.07766	0.00173616	0.060341
CBX7	protein_coding	chr22:39516172-39548679	0.562041	0.228476	2.07421	2.14417e-05	0.0050329
LINC01588	lincRNA	chr14:50394289-50559361	0.462934	0.190315	2.07293	0.000347222	0.0257237
CRISPLD2	protein_coding	chr16:84853590-84954374	1.093	0.281067	2.06777	0.00311033	0.0801119
LDHD	protein_coding	chr16:75145758-75150669	0.614671	0.114912	2.06771	0.00352407	0.0854428
GDF15	protein_coding	chr19:18485541-18499986	0.908223	0.0746726	2.06278	0.000899144	0.0431293
THBS4	protein_coding	chr5:79287134-79379110	0.574921	0.160232	2.06074	0.00415038	0.0930375
TIAM1	protein_coding	chr21:32490734-32932290	5.5687	1.1286	2.05888	5.65029e-06	0.00212534
PPM1E	protein_coding	chr17:56833230-57062537	0.154631	0.0427391	2.05621	0.00258025	0.073225
AK5	protein_coding	chr1:77747736-78025654	1.00442	0.334597	2.05456	0.00120711	0.0493367
CR1L	protein_coding	chr1:207818458-207911761	0.350251	0.0397338	2.05442	0.000575868	0.0336972
SLIT1	protein_coding	chr10:98757795-98945677	0.194492	0.0936714	2.04978	0.0040421	0.0919556
GATM	protein_coding	chr15:45653322-45694525	1.04664	0.457516	2.04905	0.00322034	0.0818465
MEIOC	protein_coding	chr17:42733772-42767676	0.20394	0.0702548	2.04887	0.00262398	0.0737172
IL1A	protein_coding	chr2:113531492-113542167	0.582769	0.0467584	2.04701	0.00178302	0.0610171
SERPINE1	protein_coding	chr7:100770370-100782547	40.6412	11.4595	2.04329	0.00241532	0.0716267
TNFSF15	protein_coding	chr9:117546915-117568406	0.121451	0.0673909	2.03874	0.00205442	0.0658462
DUSP19	protein_coding	chr2:183943287-183964733	0.883533	0.460023	2.03717	0.00113774	0.0476836
TBC1D8-AS1	lincRNA	chr2:101768122-101771874	0.417592	0.0855462	2.03617	0.00370756	0.0881654
RNASEL	protein_coding	chr1:182542769-182558391	1.6771	0.637069	2.03442	7.60868e-05	0.0112123
NBEA	protein_coding	chr13:35516424-36247159	2.10349	0.592675	2.03354	1.8653e-06	0.0012036
RP11-797A18.3	lincRNA	chr15:77336022-77337502	6.87091	1.82831	2.03143	0.00458051	0.0981295
AC093627.9	lincRNA	chr7:135853-149466	0.526589	0.121944	2.03088	0.000435686	0.0294203
NTNG1	protein_coding	chr1:107682629-108026080	0.15239	0.0120945	2.03079	0.00233788	0.0705764
CLTCL1	protein_coding	chr22:19166986-19279239	0.431894	0.186995	2.03029	0.00198654	0.064524
DIRAS1	protein_coding	chr19:2714565-2721416	2.27749	0.725054	2.02546	0.000643861	0.0363344
AL592528.1	antisense	chr21:47247875-47256333	0.325484	0.000721784	2.02278	0.000419704	0.0292367
CFAP57	protein_coding	chr1:43637820-43720029	0.192117	0.040288	2.01799	0.00120696	0.0493367
FAM90A1	protein_coding	chr12:8373856-8380214	0.387267	0.135767	2.01794	0.00156548	0.0568273
SLC8A1	protein_coding	chr2:40324410-40838193	2.75334	0.61637	2.0133	0.000136802	0.0159313
FGD1	protein_coding	chrX:54471887-54522599	0.266329	0.0368671	2.01082	0.00192524	0.0634409
RP11-307C12.13	lincRNA	chr1:154909846-154910535	1.80318	0.30843	2.00863	0.00143207	0.0538155
GNAO1	protein_coding	chr16:56225259-56391369	0.189063	0.04729	2.00825	0.00461726	0.098721
FAM19A5	protein_coding	chr22:48885272-49246724	0.491628	0.0175724	2.00317	0.000664623	0.0369905
SHROOM1	protein_coding	chr5:132157833-132166590	0.239425	0.0908176	1.99534	0.00396633	0.091248
LINC02099	lincRNA	chr8:29605825-29656008	0.195644	0.0122034	1.99277	0.00248618	0.0727482
GPAT3	protein_coding	chr4:84457067-84527028	4.85799	1.21614	1.98938	0.00064654	0.0364221
SEC14L2	protein_coding	chr22:30792846-30821305	1.17773	0.436493	1.98108	0.00342386	0.0847249
ZSWIM5	protein_coding	chr1:45482071-45771881	0.534129	0.144118	1.97607	0.00259311	0.0732949
FMNL2	protein_coding	chr2:153191751-153506348	3.00608	0.703263	1.97463	3.20316e-05	0.00644451
RP11-244F12.3	antisense	chr15:63338233-63341586	0.264329	0.106976	1.97433	0.00443637	0.096622
DZIP1L	protein_coding	chr3:137780832-137834660	0.839173	0.244293	1.97298	0.000350171	0.025779
RAB23	protein_coding	chr6:57051790-57087112	0.604131	0.418492	1.97196	0.00279971	0.0757988
BFSP1	protein_coding	chr20:17474550-17549865	1.27602	0.553825	1.97145	0.00292628	0.0776315
LINC00482	lincRNA	chr17:79277571-79283048	0.373779	0	1.97135	0.000254759	0.02149
C8B	protein_coding	chr1:57394883-57431813	0.446403	0.0158613	1.97122	0.00182742	0.0617919
TMC3-AS1	antisense	chr15:81616718-81654378	1.17954	0.363357	1.96972	0.00307077	0.0796383
HEPACAM2	protein_coding	chr7:92817899-92855837	0.528067	0.0439119	1.9693	0.00404028	0.0919556
CC2D2A	protein_coding	chr4:15471489-15603180	0.59523	0.235866	1.96798	0.00285807	0.0763849
NCF1	protein_coding	chr7:74188309-74203659	4.3576	0.862027	1.96641	0.00133733	0.0516659
STUM	protein_coding	chr1:226736501-226796915	0.196688	0.0228166	1.96166	0.00262071	0.0736893
CD36	protein_coding	chr7:79998891-80308593	8.25993	2.02181	1.96143	0.000982898	0.0447625
RP11-677M14.7	antisense	chr11:124670346-124704383	0.329601	0.0747798	1.95889	0.00262978	0.0738067
TMTC2	protein_coding	chr12:83080659-83528649	0.661463	0.250137	1.95671	0.00136187	0.0522056
SNX24	protein_coding	chr5:122179134-122365049	1.29499	0.344686	1.95607	0.004266	0.0945395
CA13	protein_coding	chr8:86132816-86196302	0.653013	0.293752	1.95386	0.000739815	0.0387769
SHANK1	protein_coding	chr19:51165084-51222707	1.80037	0.707848	1.95375	0.00280057	0.0757988
LINC00934	lincRNA	chr12:119721630-119741185	0.562883	0.00448764	1.95238	0.0016365	0.0580608
KCNK6	protein_coding	chr19:38810484-38822716	6.06831	1.82741	1.95209	2.39223e-06	0.00138373
MIR3945HG	lincRNA	chr4:185765739-185776905	1.12892	0.347399	1.95093	0.00194615	0.0638168
CRTC3-AS1	antisense	chr15:91163239-91260372	1.44971	0.498686	1.94968	0.00134936	0.0518489
ZNF98	protein_coding	chr19:22573821-22715287	0.207496	0.00582111	1.94769	8.00596e-05	0.0116584
SLC46A1	protein_coding	chr17:26721775-26734215	0.728006	0.415781	1.94648	0.000728025	0.0384701
THBD	protein_coding	chr20:23026270-23030378	5.60585	1.88158	1.94305	0.000949733	0.0439172
ENKUR	protein_coding	chr10:25270908-25351208	0.35128	0.0991092	1.94264	0.00348553	0.0852727
LINC01717	lincRNA	chr1:208902033-208906529	2.40977	0	1.94084	0.00157503	0.0569492
ZNF418	protein_coding	chr19:58433252-58446761	4.74252	2.61866	1.93759	0.000693718	0.0376163
PPM1L	protein_coding	chr3:160473390-160796695	2.82301	0.871149	1.93494	1.64923e-06	0.00109024
IL21R	protein_coding	chr16:27413483-27463363	0.801332	0.555754	1.93467	0.0012934	0.0507665
HCK	protein_coding	chr20:30639991-30689659	19.5048	3.1944	1.93465	0.000598597	0.0345013
RNF182	protein_coding	chr6:13924677-13980533	0.334324	0.0963081	1.93362	0.0038903	0.0905278
ZFHX2	protein_coding	chr14:23990064-24025401	0.827547	0.463081	1.93085	0.00203273	0.0654513
COL17A1	protein_coding	chr10:105791044-105845760	0.326858	0.135777	1.92982	0.00451484	0.0973667
RP11-468H14.2	lincRNA	chr8:16988690-17007298	0.477567	0.199681	1.92465	0.00390852	0.090691
RS1	protein_coding	chrX:18658030-18690229	0.26137	0	1.91674	0.00038615	0.0276782
ATP1A2	protein_coding	chr1:160085549-160113381	0.215374	0.0412409	1.91182	0.00173328	0.0603055
GPR162	protein_coding	chr12:6930711-6939136	1.60512	0.713119	1.91075	0.00268127	0.0746148
RAPH1	protein_coding	chr2:204259068-204400133	1.28515	0.389495	1.91045	0.000250247	0.0214444
RP11-231D20.2	antisense	chr8:42091193-42128715	0.722673	0.119968	1.90819	0.00406235	0.0920065
SLC15A3	protein_coding	chr11:60704556-60720002	4.36595	0.75429	1.90528	0.00223091	0.0689539
DUSP26	protein_coding	chr8:33448850-33457624	2.12934	0.0460693	1.90511	0.00460349	0.0985566
SYTL4	protein_coding	chrX:99929488-99987110	3.35642	1.01326	1.90341	0.000433031	0.0294203
PECR	protein_coding	chr2:216861052-216947678	1.37302	0.348657	1.90201	0.00352108	0.0854428
MATN4	protein_coding	chr20:43922085-43937169	0.169486	0.0111284	1.89744	0.000233858	0.0205433
SDSL	protein_coding	chr12:113860042-113876081	2.02051	0.759671	1.89464	0.0029901	0.0788144
EFR3B	protein_coding	chr2:25264999-25382006	0.19868	0.0865461	1.89364	0.00178103	0.0610171
PTAFR	protein_coding	chr1:28473677-28520447	9.01674	1.56697	1.89336	0.00042956	0.0294203
RP5-1184F4.7	antisense	chr20:31097762-31108088	1.06849	0.12401	1.89111	0.00406365	0.0920065
KRTAP9-9	protein_coding	chr17:39411636-39412616	1.08262	0.0306019	1.88584	0.00073133	0.0385818
RP11-823E8.3	lincRNA	chr12:89744792-89747048	1.43101	0.736473	1.86854	0.00411919	0.0926692
FSCN2	protein_coding	chr17:79495422-79504156	0.477869	0.0878622	1.86763	0.000985673	0.0447797
KLF8	protein_coding	chrX:56258854-56314322	0.63703	0.218055	1.8656	0.00230868	0.0703026
SNTB2	protein_coding	chr16:69221032-69342955	0.683807	0.274283	1.86355	0.000789732	0.0400005
SEMA6C	protein_coding	chr1:151104161-151119140	1.82007	0.613481	1.86329	0.000101075	0.0132552
FITM2	protein_coding	chr20:42931478-42939809	0.40926	0.214009	1.86067	0.00170893	0.0595863
NETO2	protein_coding	chr16:47111614-47177908	0.838319	0.297775	1.86004	0.000790329	0.0400005
RP11-1149M10.2	lincRNA	chr8:82066514-82076834	1.33917	0.128906	1.85917	0.00381835	0.0898214
FGF12-AS1	antisense	chr3:191955826-192000886	1.14488	0.00231639	1.85788	0.000568705	0.0336972
TCP10L	protein_coding	chr21:33947151-33959683	0.332952	0.0730419	1.85786	0.00311128	0.0801119
PHF21B	protein_coding	chr22:45277042-45405880	0.127864	0.010749	1.85064	0.00190412	0.063129
CXCL5	protein_coding	chr4:74861359-74864496	0.620675	0.0167094	1.84992	0.00421814	0.0938421
RP11-44N11.3	lincRNA	chr8:123792999-123793310	1.69875	0.108381	1.84719	0.000249606	0.0214444
TCTEX1D4	protein_coding	chr1:45271585-45272347	1.9636	0.672917	1.84175	0.00217455	0.0679655
RP11-453A12.1	lincRNA	chr17:60885861-60913732	0.398814	0.0234741	1.83866	0.00123439	0.0494856
SGK1	protein_coding	chr6:134490384-134639250	18.172	4.15846	1.83156	0.000139131	0.0160229
PSD3	protein_coding	chr8:18384811-18942240	4.03956	0.72149	1.83041	0.000139846	0.0160229
KANK1	protein_coding	chr9:470291-746106	1.42875	0.719023	1.82442	0.00134247	0.0517067
TMOD2	protein_coding	chr15:52043758-52108565	1.88605	0.67622	1.81926	0.000254501	0.02149
MAMDC4	protein_coding	chr9:139745395-139755251	1.07887	0.527326	1.8164	0.00371257	0.0881654
MYH15	protein_coding	chr3:108099216-108248169	0.462331	0.259624	1.81593	0.00367994	0.0879709
FAM86B1	protein_coding	chr8:12039605-12051642	0.232914	0.0569791	1.8148	0.00187654	0.0629895
TCTE1	protein_coding	chr6:44246480-44265425	0.532694	0.321156	1.80947	0.00190603	0.063129
SLC22A18AS	protein_coding	chr11:2909010-2924970	0.367193	0.128389	1.80555	0.00281113	0.0759389
IGHV3-15	IG_V_gene	chr14:106610313-106610852	1.21009	0	1.80336	0.00022361	0.0203641
RP3-473L9.4	lincRNA	chr12:111807086-111841114	3.27991	0	1.80057	0.000928357	0.0435536
RP11-123O10.4	lincRNA	chr12:67285656-67462942	6.82614	0.334611	1.8	0.00372711	0.0884079
AP003774.6	lincRNA	chr11:64161814-64163303	0.676902	0.0614271	1.78667	0.000478689	0.0306467
P2RY12	protein_coding	chr3:151055168-151102600	0.771899	0.0144088	1.77985	0.00416912	0.0933284
VCAN-AS1	antisense	chr5:82827171-82877139	0.57903	0	1.77755	0.000161886	0.0171366
RP11-79P5.9	lincRNA	chr5:72793375-72794118	0.761867	0.292113	1.77433	0.00402705	0.0919556
DGAT2	protein_coding	chr11:75470557-75512580	0.567993	0.222704	1.77377	0.00270959	0.0746608
HBE1	protein_coding	chr11:5289575-5526847	2.02107	0.0182866	1.76764	0.00377908	0.0892866
OSBP2	protein_coding	chr22:31089769-31303811	2.43146	0.799392	1.76695	0.00383792	0.089958
RPEL1	protein_coding	chr10:105005644-105007773	0.844862	0.292724	1.76348	0.00307017	0.0796383
RP11-238K6.1	lincRNA	chr8:138821687-139095813	0.106627	0	1.76004	0.000260654	0.0218604
AC104389.16	antisense	chr11:5226271-5228538	2.44951	0.0246573	1.75751	0.00392101	0.0907528
FAM71B	protein_coding	chr5:156588857-156593275	0.402525	0.0015993	1.75641	0.00206406	0.0659359
SEZ6	protein_coding	chr17:27281919-27333458	0.28229	0.111694	1.75487	0.00447882	0.0969391
MAGEB17	protein_coding	chrX:16185604-16189587	0.511064	0.00145973	1.75402	0.000445325	0.0295593
FSTL3	protein_coding	chr19:676365-683399	1.39211	0.850293	1.75011	0.00201395	0.0650406
METTL11B	protein_coding	chr1:170115142-170136931	0.435225	0.0117117	1.7483	0.00188356	0.0630523
NUTM1	protein_coding	chr15:34635516-34649938	0.148833	0.0062328	1.74694	0.00129455	0.0507665
PRKCDBP	protein_coding	chr11:6340176-6341877	0.494673	0.0347811	1.74316	0.00249415	0.072835
RP11-351D16.3	lincRNA	chr10:43632272-43633782	1.99962	0.866091	1.74239	0.00430943	0.0948954
GAS2L1	protein_coding	chr22:29702572-29708774	4.82648	1.86502	1.73912	0.00311765	0.0802119
CST3	protein_coding	chr20:23607343-23619110	60.5234	14.4487	1.73501	0.000102532	0.0133388
NHSL2	protein_coding	chrX:71130668-71381600	1.3153	0.543574	1.73449	0.00186567	0.06282
AC090505.1	lincRNA	chr3:194548619-194553321	1.94905	0	1.73299	0.00116109	0.048342
SLC2A13	protein_coding	chr12:40148823-40499891	0.894976	0.548522	1.73185	0.00454215	0.0977229
NACC2	protein_coding	chr9:138898383-138987131	2.2612	0.717184	1.72961	1.62448e-05	0.00414333
SIRPB2	protein_coding	chr20:1451386-1472233	2.70166	0.803665	1.72648	0.00198432	0.064524
TBC1D4	protein_coding	chr13:75858801-76056250	6.9287	2.33525	1.7213	2.09429e-06	0.00127447
PLA2G2C	protein_coding	chr1:20487746-20503917	0.366036	0.00831764	1.71997	0.00437948	0.0959162
CRYBG3	protein_coding	chr3:97540884-97663807	3.52299	1.76723	1.71924	9.95021e-06	0.00299872
IGF2R	protein_coding	chr6:160390131-160534539	8.79959	2.88842	1.71597	1.06206e-06	0.000807414
RP11-495P10.3	lincRNA	chr1:147801124-147816764	0.628964	0.0193405	1.71441	0.00190287	0.063129
RP11-12M5.1	lincRNA	chr1:179699352-179711832	0.875007	0.0071854	1.71398	0.000702221	0.0376595
XACT	lincRNA	chrX:112859587-113181506	1.42885	0.193991	1.71281	0.00416639	0.0933284
RP11-158I9.8	lincRNA	chr11:118661963-118663846	1.43292	0.936075	1.71226	0.00363818	0.0872301
RP11-65M17.1	lincRNA	chr11:112404943-112426525	0.366412	0.00815071	1.71014	0.00228059	0.0698828
PLBD1-AS1	antisense	chr12:14720684-14772689	0.824928	0.0404923	1.70813	0.000451454	0.0296623
LINC01613	lincRNA	chr9:122697331-122700110	0.327262	0.00606026	1.70783	0.00321367	0.0818385
RP11-134G8.5	lincRNA	chr1:201487831-201499602	1.28827	0.681854	1.70569	0.00425444	0.0943903
RP11-683L23.7	lincRNA	chr18:49815-73545	0.542444	0	1.70135	0.000478612	0.0306467
EFNB1	protein_coding	chrX:68048840-68061990	5.60313	2.67525	1.70072	0.000697104	0.0376163
ANKRD34C-AS1	lincRNA	chr15:79484049-79576287	0.760051	0.289567	1.6968	0.00327059	0.0825084
RP11-352M15.1	lincRNA	chr12:45875654-46004403	0.855636	0.0208031	1.69282	0.00275095	0.0751028
TLR4	protein_coding	chr9:120466610-120479149	8.03737	2.17399	1.69219	0.00271332	0.0746608
MYOM2	protein_coding	chr8:1993155-2113475	0.718235	0.341755	1.68831	0.00198799	0.064524
IGKV1D-8	IG_V_gene	chr2:90259593-90260250	0.724547	0	1.68513	8.75227e-05	0.0123801
CAPN2	protein_coding	chr1:223889295-223963720	13.9634	5.03995	1.6779	0.000289395	0.0232089
KIF1C	protein_coding	chr17:4901243-4931696	4.11789	1.36188	1.66874	1.26091e-05	0.00362142
RP11-18H21.3	lincRNA	chr4:153128573-153147022	0.687176	0.0163546	1.66637	0.00267429	0.0745652
MRC1L1	protein_coding	chr10:17851362-17953178	0.0767012	0	1.65888	0.000214751	0.0201046
DNM3	protein_coding	chr1:171810638-172387606	1.28925	0.357427	1.65224	0.00449303	0.0971551
ARHGAP31	protein_coding	chr3:119013220-119139561	4.09688	1.25579	1.652	0.000767858	0.0396058
SNX21	protein_coding	chr20:44462449-44471914	0.741838	0.20053	1.65097	0.00373591	0.0885249
KLF4	protein_coding	chr9:110247133-110252763	108.764	38.0051	1.64943	2.02496e-07	0.000364403
RP11-13A1.1	lincRNA	chr12:89404458-89413456	0.255511	0.00085063	1.64093	0.00064801	0.0364416
KB-1991G8.1	lincRNA	chr8:101349823-101362935	1.14684	0.008614	1.63888	0.00249828	0.0728392
HLA-DMB	protein_coding	chr6:32902406-32908847	11.358	4.86512	1.63856	0.000172392	0.0176968
RP11-203M5.8	lincRNA	chr14:20942948-20945248	3.20961	1.24567	1.63741	0.00325041	0.0822072
UGT1A10	protein_coding	chr2:234545100-234681951	0.145777	0.00286323	1.62955	0.00243895	0.0718858
RP11-515O17.2	antisense	chr17:53348865-53351014	0.370019	0	1.62598	0.000712265	0.0380175
SLC9A9	protein_coding	chr3:142984064-143567373	3.95237	1.21097	1.6239	9.68784e-05	0.0130211
AP001630.5	antisense	chr21:44384749-44385473	1.16046	0	1.62364	0.0015788	0.0569492
TNFAIP8L2	protein_coding	chr1:151129105-151132225	5.1135	2.12059	1.61865	0.00260858	0.0734358
GUCY1B3	protein_coding	chr4:156680144-156728743	9.33344	2.80974	1.61645	5.9234e-05	0.00930809
EFNB3	protein_coding	chr17:7608520-7614696	0.217743	0.0123406	1.61585	0.00343189	0.0847301
NR1D1	protein_coding	chr17:38249040-38256978	3.70832	1.15249	1.61533	4.97467e-05	0.00832526
RP11-16K12.1	antisense	chr15:79271231-79278268	0.317322	0.0378946	1.61479	0.00291795	0.0774739
ZNF532	protein_coding	chr18:56529832-56653712	2.06772	0.835423	1.61149	0.000276	0.0225194
TFEB	protein_coding	chr6:41651716-41703997	4.54614	1.47545	1.60811	0.00020615	0.019698
HPDL	protein_coding	chr1:45792577-45794205	2.71528	1.20354	1.60311	0.00331152	0.0829596
FGD4	protein_coding	chr12:32552463-32798984	1.50479	0.480139	1.59868	0.000232902	0.0205433
PTPRD	protein_coding	chr9:8314246-10612723	5.95081	2.60099	1.59715	0.000688651	0.0374904
CFP	protein_coding	chrX:47482571-47489704	12.7401	3.04329	1.59602	0.000793819	0.0400567
RTBDN	protein_coding	chr19:12936292-12946242	0.198869	0.00511258	1.59597	0.00270395	0.0746608
AGTRAP	protein_coding	chr1:11796141-11814859	8.10643	3.35422	1.59521	0.00121041	0.0493367
LINC00665	lincRNA	chr19:36803969-36822620	1.65929	1.02185	1.59474	0.00438726	0.0959549
PELO	protein_coding	chr5:52083774-52099880	2.73175	1.48616	1.58908	0.000712417	0.0380175
SETD7	protein_coding	chr4:140417095-140527853	4.43156	1.83462	1.58781	4.12101e-05	0.00729751
PLXDC2	protein_coding	chr10:20105168-20578785	6.97689	3.03422	1.58599	0.000448134	0.0296244
IGHV4-31	IG_V_gene	chr14:106805209-106805716	0.658324	0.0117315	1.57728	0.000425722	0.0294203
LURAP1L	protein_coding	chr9:12775020-12822130	0.401932	0	1.57466	0.00185184	0.0624843
MS4A6E	protein_coding	chr11:60102304-60164069	0.761845	0	1.57015	0.000875762	0.0422767
RP11-195F19.9	antisense	chr9:34665662-34681295	0.802172	0.158572	1.56912	0.00389724	0.0905433
PKIB	protein_coding	chr6:122793076-123047518	0.152882	0.0154639	1.56671	0.00424324	0.0942063
RP11-320M16.2	antisense	chr14:32842543-32887180	0.414309	0.00924647	1.56596	0.00153041	0.0561418
CEBPD	protein_coding	chr8:48649471-48651648	54.6816	13.5271	1.56066	0.00122196	0.0493965
IL1B	protein_coding	chr2:113587328-113594480	52.557	16.2824	1.55847	8.21187e-07	0.000738886
ZNF804A	protein_coding	chr2:185463093-185804219	1.77622	0.884422	1.55802	0.00259137	0.0732949
ARHGEF12	protein_coding	chr11:120207623-120360645	3.91235	1.80399	1.55611	0.00405021	0.0919556
VLDLR	protein_coding	chr9:2621834-2660053	0.823142	0.377815	1.54405	0.00057612	0.0336972
PEX5L-AS2	antisense	chr3:179616017-179639683	0.934163	0	1.54194	0.00315132	0.0808214
VASH1	protein_coding	chr14:77228532-77249358	6.36674	2.24419	1.54142	4.06032e-05	0.00726863
RP11-370F5.4	lincRNA	chr9:95909322-95910838	1.34567	0	1.53959	0.0020522	0.0658462
C4orf48	protein_coding	chr4:2043720-2045697	7.95911	3.20127	1.53747	0.00187248	0.0629183
RP1-269M15.3	lincRNA	chr20:41818741-41831239	0.17651	0.00239361	1.52385	0.00215246	0.0677575
DCBLD2	protein_coding	chr3:98514785-98620533	1.23019	0.479181	1.52299	0.00302609	0.0791596
CDKN1A	protein_coding	chr6:36644237-36655116	44.8275	18.413	1.5206	0.000226324	0.0203641
MYO5C	protein_coding	chr15:52484519-52587995	6.80173	3.01041	1.51527	0.00402244	0.0919556
GRM7-AS3	lincRNA	chr3:6673376-6847136	0.146626	0.00377662	1.51479	0.0025716	0.073225
LIPM	protein_coding	chr10:90562487-90580303	0.239468	0.0031481	1.51411	0.000338781	0.0254023
ITGAX	protein_coding	chr16:31366455-31394318	15.7753	3.81601	1.51282	0.000123848	0.014969
DGKH	protein_coding	chr13:42614172-42830714	1.0566	0.516987	1.50575	2.11876e-05	0.00500954
TNFRSF1B	protein_coding	chr1:12227060-12269285	32.8789	8.71019	1.50457	0.000550793	0.033224
ZNF653	protein_coding	chr19:11594242-11616738	2.93075	1.25979	1.50018	2.23302e-05	0.00520374
INTU	protein_coding	chr4:128544426-128647892	0.45015	0.23487	1.49548	0.00392239	0.0907528
SQRDL	protein_coding	chr15:45923346-45983492	3.58328	1.4777	1.49342	0.0020389	0.0655248
SCPEP1	protein_coding	chr17:55055466-55084129	11.8431	4.6879	1.48715	0.000719204	0.0381243
CD93	protein_coding	chr20:23059986-23066977	23.0828	6.51553	1.48593	0.002374	0.0710202
FCHO2	protein_coding	chr5:72251808-72386349	3.46772	1.63962	1.48564	0.00126689	0.0503521
INSR	protein_coding	chr19:7112266-7294045	7.54053	3.49988	1.48539	0.000615323	0.0352233
TNS1	protein_coding	chr2:218664512-218867718	5.40673	2.07047	1.4831	1.26166e-06	0.000928814
RIC8B	protein_coding	chr12:107168373-107283094	1.54257	0.945274	1.48225	0.00178335	0.0610171
PSG8-AS1	lincRNA	chr19:43326015-43331030	0.170589	0.00916255	1.47785	0.00285347	0.0763849
GNA11	protein_coding	chr19:3094408-3124002	2.81681	1.12978	1.46991	9.49643e-05	0.0129908
EVA1A	protein_coding	chr2:75696428-75796848	0.14206	0.00361013	1.4684	0.00120279	0.0493175
ARFIP1	protein_coding	chr4:153701089-153839615	2.77688	1.3235	1.46744	0.000238941	0.0207669
DEFB116	protein_coding	chr20:29891015-29896388	1.9599	0	1.46735	0.00393096	0.0908163
RP11-308N19.3	lincRNA	chr9:109377359-109378087	0.828077	0.020563	1.46215	0.00427626	0.0946219
RP3-525N10.2	antisense	chr6:69339854-69344919	0.139694	0	1.4578	0.000223734	0.0203641
IFITM3	protein_coding	chr11:319669-327537	62.0185	22.2787	1.45278	0.000145845	0.016522
LINC00877	lincRNA	chr3:72084451-72328654	3.7427	1.07326	1.44937	0.000451395	0.0296623
SSX3	protein_coding	chrX:48205863-48216142	0.200816	0	1.44683	0.00337027	0.0837193
PON1	protein_coding	chr7:94926988-94954019	0.214895	0.00761211	1.44241	0.00254833	0.073225
ASGR1	protein_coding	chr17:7076750-7082883	1.8049	0.917688	1.43331	0.000313354	0.0241671
CD4	protein_coding	chr12:6896024-6929974	24.7744	6.3469	1.43267	0.000618962	0.0353605
GPR158-AS1	antisense	chr10:25447001-25465205	0.253736	0.00294528	1.42706	0.00202091	0.0651357
OTUD1	protein_coding	chr10:23728387-23731319	39.1277	12.656	1.42662	5.41311e-06	0.00212534
CTSS	protein_coding	chr1:150702672-150738433	116.634	23.0227	1.42641	0.00154067	0.056263
KCTD17	protein_coding	chr22:37447776-37459430	3.81363	1.94007	1.42288	0.0014379	0.0539703
STARD8	protein_coding	chrX:67867508-67945684	6.25299	2.55445	1.42286	2.48362e-07	0.00036568
SNAI1	protein_coding	chr20:48599536-48605423	9.44792	5.30053	1.41854	0.000846755	0.0415778
CTIF	protein_coding	chr18:46065417-46389588	4.57918	2.0972	1.41701	0.00120974	0.0493367
RP1-144F13.3	antisense	chr1:40099088-40099575	1.69639	0	1.41644	0.00278972	0.0757988
RP3-398G3.5	antisense	chr6:152723533-152726101	1.00498	0	1.41385	0.00244836	0.072032
GCNT2	protein_coding	chr6:10492456-10629601	2.3275	1.32407	1.40334	0.000386223	0.0276782
ZNF154	protein_coding	chr19:58208735-58220562	5.52048	3.45367	1.4006	0.00161517	0.0575053
HLA-DOA	protein_coding	chr6:32971955-32977389	14.8843	7.03316	1.39137	0.0025139	0.0728548
ARSE	protein_coding	chrX:2852673-2886351	0.179992	0.0017385	1.38755	0.00188678	0.0630523
RP11-879F14.2	lincRNA	chr18:59252979-59274149	0.357055	0.00307712	1.38337	0.00160735	0.0574663
FOS	protein_coding	chr14:75745477-75748933	901.144	359.211	1.3831	1.07183e-06	0.000807414
RP4-594L9.2	lincRNA	chr11:34554561-34579471	1.09043	0	1.38203	0.00178272	0.0610171
STK32B	protein_coding	chr4:5053169-5502725	5.44974	2.75539	1.37648	0.00159383	0.0571098
CASKIN2	protein_coding	chr17:73496342-73511664	2.25218	0.90455	1.37468	0.000215442	0.0201112
TNXB	protein_coding	chr6:32008931-32083111	0.412199	0.16044	1.36719	0.00334805	0.0834231
CETN1	protein_coding	chr18:580357-582114	0.239342	0	1.3661	0.00157775	0.0569492
UGT2A3	protein_coding	chr4:69794181-69817509	0.137485	0.00152324	1.36407	0.00258121	0.073225
PI3	protein_coding	chr20:43803517-43805185	0.239349	0	1.35914	0.000220107	0.0203641
RP1-79C4.1	lincRNA	chr1:170567995-170616480	0.356534	0.00282806	1.35762	0.0027041	0.0746608
IGKV3-20	IG_V_gene	chr2:89442057-89442643	1.01297	0.0625426	1.35628	0.00230927	0.0703026
CLEC11A	protein_coding	chr19:51226586-51228975	37.6329	15.2657	1.35104	0.00345035	0.0849395
FAM49A	protein_coding	chr2:16730727-16847599	7.66552	3.83031	1.34689	0.00159331	0.0571098
ANGPT4	protein_coding	chr20:850542-896960	0.0746691	0.00111017	1.34618	0.00159306	0.0571098
SORT1	protein_coding	chr1:109852190-109940573	5.50552	2.12224	1.34025	0.00166572	0.0584573
TYROBP	protein_coding	chr19:36395303-36399197	136.371	29.4442	1.33068	0.00333702	0.083289
RP11-219E7.1	antisense	chr14:21252047-21252452	1.50265	0.0968957	1.32777	0.00176216	0.0610171
ZDHHC13	protein_coding	chr11:19138646-19197969	1.07365	0.575876	1.32599	0.00330309	0.0829268
LINC00332	lincRNA	chr13:40755946-40763165	0.468159	0	1.32415	0.00419482	0.0937093
LINC00570	lincRNA	chr2:11534107-11543203	0.238556	0	1.32367	0.00128556	0.0506881
RGS18	protein_coding	chr1:192127587-192154945	7.74004	3.02743	1.32167	0.00153597	0.0561548
OR2AG2	protein_coding	chr11:6789218-6790286	0.390916	0.00525336	1.32138	0.00323153	0.081906
RP11-306I1.2	lincRNA	chr1:165567700-165592568	0.481746	0.00817528	1.32037	0.00118695	0.0489156
RP11-856F16.2	antisense	chr11:94607217-94658686	0.415995	0	1.31812	0.000819337	0.0406431
STEAP2	protein_coding	chr7:89796904-89867451	0.0460572	0.000973608	1.31276	0.00396406	0.091248
KANSL1L	protein_coding	chr2:210886147-211036107	2.79406	1.1931	1.31113	4.14529e-05	0.00729751
RAMP3	protein_coding	chr7:45197390-45225901	0.221577	0	1.30573	0.00102271	0.0459007
RP11-243J16.7	antisense	chr20:30274019-30304628	0.873126	0	1.3047	0.00117736	0.0486442
EXOC6B	protein_coding	chr2:72403113-73053170	2.73016	1.00382	1.30161	0.000307215	0.0239099
RP1-80N2.2	lincRNA	chr6:6692977-6711235	0.57793	0.0543534	1.30134	0.00387228	0.090479
LINC01231	lincRNA	chr9:3181589-3198517	0.571799	0.00602995	1.30044	0.00420022	0.0937653
RP5-821D11.7	antisense	chr22:42227219-42230669	3.82338	1.82787	1.29757	0.00102687	0.0459007
ALX4	protein_coding	chr11:44281994-44331716	0.0580733	0.00438281	1.29722	0.0040149	0.0919556
SPINT4	protein_coding	chr20:44350990-44354469	0.874899	0	1.29564	0.00407867	0.0921325
MAB21L1	protein_coding	chr13:36048319-36051346	0.0948323	0.0106757	1.29554	0.00443898	0.096622
MOCS2	protein_coding	chr5:52391509-52405893	2.64465	1.30328	1.29546	0.000414852	0.0289609
RP11-156K13.1	antisense	chr8:17658854-17718578	0.515897	0	1.29419	0.00321576	0.0818385
POU2F2	protein_coding	chr19:42590262-42700737	9.27372	4.21934	1.29403	3.64483e-05	0.00682447
BACH2	protein_coding	chr6:90636248-91006627	7.42052	2.27853	1.29281	0.00200041	0.0647776
FN3K	protein_coding	chr17:80693451-80709073	3.63334	1.8086	1.29133	0.00370599	0.0881654
HOXB3	protein_coding	chr17:46626232-46682274	2.44686	1.37813	1.28721	0.0036024	0.0866289
ZNF462	protein_coding	chr9:109625378-109775915	3.4012	1.13736	1.28659	0.00248865	0.072755
RP11-699L21.2	lincRNA	chr3:193698403-193723887	0.485249	0	1.28444	0.000695049	0.0376163
BTBD19	protein_coding	chr1:45274154-45281257	8.70174	4.38309	1.28334	0.00402402	0.0919556
PLA2G4E-AS1	antisense	chr15:42264961-42291292	0.109686	0.00948798	1.27624	0.00226128	0.069744
CCDC106	protein_coding	chr19:56152428-56164527	3.94877	2.02279	1.27573	0.0015551	0.0567245
RP11-168P8.3	lincRNA	chr10:44407892-44409684	0.54057	0	1.27277	0.0030279	0.0791596
RP11-6N17.10	antisense	chr17:46057764-46073562	0.710959	0.0231103	1.26923	0.00184112	0.0621871
SYNE3	protein_coding	chr14:95873603-95942173	9.20736	3.5612	1.26814	3.85971e-05	0.00710363
CELSR2	protein_coding	chr1:109792641-109818372	0.613304	0.28033	1.26779	0.00322928	0.081906
RP1-56K13.5	lincRNA	chr17:37159501-37169285	0.310718	0	1.26763	0.0011132	0.0470125
SFTPD	protein_coding	chr10:81697496-81742370	0.281028	0.0306226	1.26596	0.00402782	0.0919556
RP11-907D1.2	lincRNA	chr14:97582692-97587838	0.287331	0.013371	1.2654	0.00413569	0.0928808
BTG4	protein_coding	chr11:111338251-111383079	0.196743	0.00509926	1.26503	0.00268936	0.0746475
TTYH2	protein_coding	chr17:72209653-72258159	3.83639	1.67008	1.26463	0.000429018	0.0294203
SELPLG	protein_coding	chr12:109016053-109027735	54.6923	27.3543	1.26398	0.00231275	0.0703424
RP11-313P18.1	antisense	chr15:52000192-52007417	0.704452	0.0332586	1.2628	0.00268811	0.0746475
STAB1	protein_coding	chr3:52529354-52558511	8.48565	3.2225	1.25479	0.0025754	0.073225
SLC22A16	protein_coding	chr6:110745890-110797844	2.84707	1.37813	1.25227	0.0017652	0.0610171
FSHB	protein_coding	chr11:30252563-30256808	0.164729	0.00136112	1.24907	0.00221138	0.068612
CTXN3	protein_coding	chr5:126984736-126994322	0.14719	0	1.24875	0.00105728	0.0461496
ANXA2	protein_coding	chr15:60639333-60695082	6.54193	2.59504	1.24809	0.0030039	0.0790056
PI4K2A	protein_coding	chr10:99400443-99436191	3.60676	1.60704	1.24737	0.000931762	0.0435536
ATG4C	protein_coding	chr1:63249806-63331184	5.59163	2.984	1.24715	0.000801143	0.0402468
MPP7	protein_coding	chr10:28339922-28623415	4.95773	2.13949	1.24159	7.16061e-05	0.0107882
LINC00974	lincRNA	chr17:39705858-39710747	0.150279	0	1.23895	0.0014263	0.0537767
IRS1	protein_coding	chr2:227596033-227664475	0.629092	0.367952	1.2385	0.00236059	0.0709099
ITGA6	protein_coding	chr2:173292082-173371010	10.746	5.29142	1.23701	0.00222209	0.0687608
FAM110A	protein_coding	chr20:814358-838106	12.2573	5.28528	1.23446	0.000301707	0.0236558
SEMA4B	protein_coding	chr15:90703836-90772911	2.66597	1.05154	1.23288	0.00107511	0.0463096
SLC15A5	protein_coding	chr12:16341419-16430619	0.158331	0	1.23176	0.00260943	0.0734358
FAM149A	protein_coding	chr4:187025573-187093821	0.0523542	0.00518253	1.22697	0.00421635	0.0938421
TAT-AS1	antisense	chr16:71599692-71612090	0.300954	0.012817	1.22167	0.00325103	0.0822072
RP4-724E13.2	antisense	chr7:50934444-51090687	0.480906	0	1.21759	0.00263172	0.0738067
LINC00488	lincRNA	chr3:108897012-108904104	0.0813772	0	1.21174	0.000630366	0.0356972
RP4-781K5.4	lincRNA	chr1:234782035-234818922	0.122692	0	1.20966	0.00117438	0.0486122
IGLV7-43	IG_V_gene	chr22:22749356-22749827	1.09881	0	1.20958	0.00167644	0.0586428
RP11-256I23.1	antisense	chr2:220411933-220412380	0.694379	0.0100884	1.20941	0.00329222	0.0828606
PODXL	protein_coding	chr7:131185021-131242976	0.888861	0.480405	1.20729	0.00455082	0.0978171
LINC02065	lincRNA	chr5:65502040-65505275	0.318094	0	1.20361	0.00219834	0.0684462
FOSB	protein_coding	chr19:45971253-45978437	507.812	252.381	1.20226	6.60555e-05	0.0100454
SPINT1	protein_coding	chr15:41136216-41150405	6.96976	3.1867	1.20183	0.00104869	0.0461388
DUSP6	protein_coding	chr12:89741009-89747048	86.3359	46.353	1.19799	0.000358896	0.0262424
ARL13A	protein_coding	chrX:100224697-100245818	0.211815	0.00490088	1.19465	0.00466016	0.0993758
SRC	protein_coding	chr20:35973088-36034453	8.38115	3.37581	1.19143	0.000756945	0.0392304
CDH23	protein_coding	chr10:73156691-73575704	0.584877	0.328431	1.18976	0.00211051	0.0669575
RP11-321G12.1	lincRNA	chr15:63682335-63730519	0.0829402	0.00251831	1.18935	0.00121271	0.0493367
ITGAM	protein_coding	chr16:31271311-31344213	24.4072	7.03301	1.18714	0.003943	0.0908405
RP11-286N3.1	antisense	chr18:5463626-5480974	0.264955	0	1.18471	0.0034752	0.0852479
HVCN1	protein_coding	chr12:111065646-111142755	5.51073	2.86407	1.18101	0.00428642	0.0947105
DCAF12	protein_coding	chr9:34086385-34127397	12.3015	5.69165	1.1801	2.53916e-06	0.00139513
DLGAP1-AS4	antisense	chr18:3962353-4013943	0.200002	0	1.17947	0.000742546	0.038825
FAM95B1	lincRNA	chr9:42466317-42474239	0.021161	0.000507666	1.17727	0.00386472	0.0903871
LRRC72	protein_coding	chr7:16566505-16621193	0.0931886	0.0077104	1.17669	0.00199794	0.0647776
PTGES	protein_coding	chr9:132500610-132515326	0.119901	0	1.17568	0.00137323	0.05227
RP11-21L23.4	antisense	chr11:76470960-76479267	0.496368	0	1.17093	0.00275886	0.0752231
SCARF1	protein_coding	chr17:1537152-1549041	7.56722	4.86506	1.16933	0.000676937	0.0373549
RP11-629E24.2	lincRNA	chr13:30596158-30597937	0.15856	0	1.16411	0.00252768	0.073039
CREBL2	protein_coding	chr12:12764761-12798042	4.34539	1.68706	1.16298	0.000717212	0.0380851
RP11-22A3.2	lincRNA	chr4:12860725-12866585	0.101964	0.00261873	1.16264	0.00222254	0.0687608
SST	protein_coding	chr3:187386694-187388187	0.315598	0	1.15413	0.000983913	0.0447625
SPATA19	protein_coding	chr11:133710526-133715433	0.434539	0.00955537	1.15409	0.00446418	0.0969363
SORBS3	protein_coding	chr8:22402499-22433301	12.4049	5.85296	1.15217	0.00405801	0.0920065
MCOLN1	protein_coding	chr19:7587512-7598895	3.58116	1.67669	1.15146	0.00109769	0.0467231
RP11-174J11.1	lincRNA	chr10:65796105-65797040	0.243329	0	1.14893	0.00108161	0.0464661
RP11-722P11.4	antisense	chr12:48877070-48894744	0.51648	0.0136811	1.14787	0.00379317	0.0894239
LINC00454	lincRNA	chr13:114581462-114586624	0.100801	0	1.14727	0.00272239	0.0746806
MNX1-AS1	lincRNA	chr7:156803499-156809120	0.284188	0	1.14621	0.00270956	0.0746608
TUBA4A	protein_coding	chr2:220114433-220142892	10.6478	4.97783	1.1413	0.000502441	0.0316811
LINC01070	lincRNA	chr13:112851664-112855314	0.0900238	0	1.14028	0.00193171	0.0635811
FAM109B	protein_coding	chr22:42470255-42475445	1.90369	1.02618	1.13769	0.00308716	0.0798773
RP11-124N3.2	lincRNA	chr5:19035306-19038908	0.243876	0	1.13659	0.00178166	0.0610171
PNP	protein_coding	chr14:20937113-20945253	47.4384	21.0464	1.13577	8.52953e-08	0.000269565
OBSCN	protein_coding	chr1:228395831-228566575	4.79201	2.6894	1.13302	0.000814046	0.0405047
LHFPL1	protein_coding	chrX:111873876-111923282	0.0789288	0	1.12568	0.00166398	0.0584573
THEMIS2	protein_coding	chr1:28199054-28213196	37.7943	16.6033	1.12562	0.000104768	0.0134668
WI2-8325B5.1	lincRNA	chr20:59944935-59945911	0.252407	0.0051212	1.12533	0.00227979	0.0698828
ATM	protein_coding	chr11:108093211-108239829	5.08194	2.43086	1.1251	3.91422e-07	0.000437205
LINC00499	lincRNA	chr4:139230865-139345498	0.128633	0	1.12419	0.00106834	0.0463096
REM1	protein_coding	chr20:30063096-30072708	0.180992	0.00337288	1.12294	0.0033746	0.0837626
RP11-104H15.8	antisense	chr17:7342478-7346646	0.863239	0	1.12037	0.00303897	0.0792011
LINC00533	lincRNA	chr6:28616063-28616843	0.321289	0	1.11999	0.0024365	0.0718858
WBP1L	protein_coding	chr10:104503727-104576024	10.0657	5.18823	1.11909	0.000205428	0.0196871
AC004692.4	antisense	chr7:43278665-43288867	0.294399	0	1.11868	0.00352086	0.0854428
FCN2	protein_coding	chr9:137772658-137779366	0.258313	0.00441264	1.11679	0.00186892	0.0628639
C1orf21	protein_coding	chr1:184356192-184598154	3.49401	1.88388	1.11203	0.00104015	0.0460911
TCIRG1	protein_coding	chr11:67806483-67818362	20.2137	8.50265	1.10864	2.78685e-05	0.00602656
LINC01153	lincRNA	chr10:122938214-122945480	0.14044	0	1.10467	0.00440425	0.0961804
FAM214B	protein_coding	chr9:35104109-35116338	5.71065	3.00017	1.104	0.000344295	0.0255789
HCG24	antisense	chr6:33112560-33115544	0.231333	0	1.10284	0.00283183	0.0763091
LPP-AS1	antisense	chr3:188280026-188286454	0.555231	0	1.10204	0.00269214	0.0746608
CPPED1	protein_coding	chr16:12753656-12897874	13.855	6.04524	1.09981	0.000292532	0.0233391
ZNF75A	protein_coding	chr16:3355406-3368852	2.938	1.58274	1.0996	0.000228265	0.0203983
LYST	protein_coding	chr1:235824341-236046940	7.35184	3.11199	1.09445	0.000651676	0.0365209
ICK	protein_coding	chr6:52866077-52926600	3.9509	1.7819	1.09443	0.00106732	0.0463096
CRYBB2	protein_coding	chr22:25615489-25627836	0.224067	0.0117337	1.08991	0.00254408	0.073225
RP11-510C10.4	lincRNA	chr1:75588203-75589612	0.240461	0	1.0899	0.00370992	0.0881654
RP11-506K6.4	antisense	chr6:3311896-3313884	0.0528857	0	1.0884	0.000932703	0.0435536
AC084809.3	lincRNA	chr17:31232680-31233602	0.734135	0	1.08781	0.00393915	0.0908163
IFNA8	protein_coding	chr9:21409146-21410184	0.193967	0	1.08535	0.00289059	0.077
BAIAP2	protein_coding	chr17:79008922-79091232	1.99313	0.922725	1.07954	0.00110306	0.0468278
USP31	protein_coding	chr16:23072727-23160591	1.23066	0.76278	1.07931	0.00012292	0.0149685
ZNF135	protein_coding	chr19:58570607-58597677	2.59991	1.41481	1.07921	0.0022798	0.0698828
ENOX2	protein_coding	chrX:129757343-130037291	4.17721	2.13278	1.07921	0.00303276	0.0791596
REXO2	protein_coding	chr11:114310108-114321001	9.38938	4.96364	1.07823	0.00355312	0.0858261
RFPL1	protein_coding	chr22:29834572-29838444	0.117369	0.00537732	1.07618	0.00383465	0.089958
HSD3B1	protein_coding	chr1:120049821-120057677	0.120059	0	1.0756	0.00326645	0.0824684
MKI67	protein_coding	chr10:129894923-129924649	64.5908	25.4592	1.07472	0.00124473	0.049777
RP11-77I22.2	lincRNA	chr12:30908008-30933673	0.241177	0	1.07191	0.00255787	0.073225
EMILIN2	protein_coding	chr18:2847028-2915991	24.1676	10.4238	1.06801	0.00345086	0.0849395
AC092669.6	lincRNA	chr2:66554481-66556116	0.11795	0	1.06778	0.000996928	0.0451643
ZNF385A	protein_coding	chr12:54762917-54785082	45.3718	19.3513	1.06703	0.000121639	0.0149685
DMXL2	protein_coding	chr15:51739908-51915030	6.84215	2.98077	1.06436	0.000262271	0.0218604
RP11-285C1.2	lincRNA	chr4:153955363-154012317	0.481129	0	1.06288	0.00353151	0.0855364
TSPAN8	protein_coding	chr12:71518865-71835678	0.0853587	0	1.06229	0.00234227	0.0706433
LINC01960	lincRNA	chr2:174890008-174891891	0.112988	0.00298081	1.05737	0.00330453	0.0829268
GBGT1	protein_coding	chr9:136028335-136039332	10.1257	4.49095	1.0568	0.000159715	0.0171366
RP11-424M21.1	lincRNA	chr4:152720652-152722500	0.305446	0	1.05654	0.00246922	0.0724484
RP1-310O13.7	antisense	chr20:30615556-30619378	0.15089	0	1.05562	0.00465591	0.0993506
IL16	protein_coding	chr15:81451916-81606399	9.34	4.6349	1.0556	0.000804292	0.0402816
LRRC27	protein_coding	chr10:134145658-134193422	1.34179	0.780916	1.05115	0.0010542	0.0461496
TCEAL7	protein_coding	chrX:102585124-102587254	0.16206	0	1.05114	0.00180365	0.0613695
SEMA4A	protein_coding	chr1:156117157-156147543	8.18321	3.86536	1.04998	0.00251681	0.0728548
DAB2	protein_coding	chr5:39371777-39462402	4.50328	2.23768	1.04375	0.00016922	0.0175685
RP11-471M2.3	lincRNA	chr13:88459889-88463487	0.034018	0	1.04339	0.00228817	0.0699892
FAM109A	protein_coding	chr12:111798455-111806925	3.4075	1.74103	1.03255	0.000684052	0.0374646
AL109767.1	antisense	chr14:99729285-99731072	0.408465	0	1.0227	0.00286984	0.0766362
LINC02105	lincRNA	chr5:53072474-53115516	0.240325	0	1.02125	0.00380587	0.089658
IQSEC1	protein_coding	chr3:12938719-13114617	27.6279	14.2449	1.02125	1.33642e-05	0.00373184
VSIG10	protein_coding	chr12:118501398-118573831	2.1017	0.908573	1.01971	0.00393477	0.0908163
LDLRAD4	protein_coding	chr18:13217497-13652754	13.5489	7.3495	1.01612	0.00134143	0.0517067
IGLV3-27	IG_V_gene	chr22:23010758-23011276	0.564512	0	1.01051	0.00347124	0.0852468
RP11-34F13.2	lincRNA	chr15:68126648-68131217	0.0823102	0	1.01015	0.00187856	0.0629921
KRT26	protein_coding	chr17:38922490-38928414	0.101276	0.00260797	1.00838	0.00433311	0.0952225
ZNF814	protein_coding	chr19:58360099-58400442	2.45883	1.46346	1.00805	0.000505042	0.0316811
APCS	protein_coding	chr1:159557615-159558655	0.24471	0	1.00631	0.00355997	0.0859273
AC008686.1	protein_coding	chr19:13890884-13900972	0.415884	0.0123875	1.00182	0.0025024	0.0728548
AC141930.2	lincRNA	chr2:1576326-1584083	0.404375	0	0.993835	0.00332811	0.0832465
ABHD15	protein_coding	chr17:27887565-27894155	6.5358	3.32276	0.993118	0.00358066	0.0862417
RP11-944C7.1	lincRNA	chr14:90095265-90109015	0.238321	0	0.987832	0.0044739	0.0969391
SRGAP2	protein_coding	chr1:206516200-206637783	5.22212	2.62337	0.987264	3.45224e-05	0.00661686
PLEC	protein_coding	chr8:144989315-145050902	43.1919	21.007	0.986975	0.000552165	0.0332448
CELSR3	protein_coding	chr3:48673902-48700348	1.05328	0.55449	0.985823	0.00290393	0.0772284
DEF8	protein_coding	chr16:90014333-90034468	2.32872	1.17427	0.98567	0.00224914	0.0694509
BMP2K	protein_coding	chr4:79697496-79837526	13.1556	7.6879	0.985475	0.000204902	0.0196871
RP11-101E14.3	lincRNA	chr20:38660227-38672531	0.299027	0	0.984689	0.00232736	0.0704685
NHSL1	protein_coding	chr6:138743180-139013708	2.14544	1.25088	0.984309	0.00151099	0.0558084
S100A6	protein_coding	chr1:153507075-153508720	210.757	95.5736	0.983873	0.00388383	0.0904932
KANK2	protein_coding	chr19:11274943-11308467	9.04	4.11943	0.980007	0.000159936	0.0171366
LINC00969	lincRNA	chr3:195384933-195466835	2.12798	1.10363	0.979685	3.98782e-05	0.00721639
PPFIBP1	protein_coding	chr12:27676364-27848497	5.29774	2.85036	0.979485	0.000225505	0.0203641
MAST3	protein_coding	chr19:18208603-18262502	7.73535	4.20027	0.978148	0.000199084	0.0194826
DUSP1	protein_coding	chr5:172195093-172198198	583.785	288.232	0.973975	0.000132327	0.0155867
ARAP1	protein_coding	chr11:72396114-72504644	26.6733	13.3033	0.973631	4.13031e-06	0.00188435
ROCK2	protein_coding	chr2:11319887-11488456	11.1144	6.23063	0.967009	2.10322e-06	0.00127447
RP11-727F15.14	protein_coding	chr11:62599791-62600275	0.307896	0	0.966986	0.00165212	0.0581593
LINC01661	lincRNA	chr1:107360861-107380789	0.292792	0	0.964844	0.00407872	0.0921325
PCP4	protein_coding	chr21:41239243-41301322	0.105642	0	0.963051	0.00110714	0.0468278
CIITA	protein_coding	chr16:10960079-11026138	20.2206	12.1967	0.961942	0.00250698	0.0728548
RP11-380F14.2	antisense	chr9:86893134-86905046	0.392863	0	0.961616	0.00296074	0.0782891
HLA-F	protein_coding	chr6:29690552-29706305	17.0476	11.3475	0.961206	0.00182107	0.0617031
RP11-266K22.2	antisense	chr1:31805914-31819646	0.396078	0	0.96067	0.00205968	0.0658608
MOB3C	protein_coding	chr1:47073387-47082563	4.98516	3.14874	0.95942	0.00301679	0.0791596
UGT1A4	protein_coding	chr2:234627424-234681945	0.124438	0	0.958809	0.00436054	0.0956903
RP11-239A17.1	lincRNA	chr12:16814700-16941309	0.18547	0	0.958409	0.00438706	0.0959549
FLCN	protein_coding	chr17:17115526-17140502	2.01456	1.06053	0.956167	0.000954967	0.0440018
RAD52	protein_coding	chr12:1021243-1099219	3.12564	1.77602	0.955375	0.00056632	0.0336972
ASXL2	protein_coding	chr2:25956622-26101385	8.50054	5.0844	0.953979	0.000289235	0.0232089
PRIMPOL	protein_coding	chr4:185570767-185616117	7.71838	4.25402	0.952159	0.00149682	0.0554115
RP11-335I12.2	antisense	chr12:66645525-66651214	0.177526	0.00449641	0.950683	0.00219656	0.0684462
ALDH2	protein_coding	chr12:112204691-112255333	4.22857	2.05226	0.95036	0.00102107	0.0459007
LINC01929	lincRNA	chr18:52773135-52791537	0.0577379	0	0.945915	0.00302582	0.0791596
C17orf62	protein_coding	chr17:80400465-80408705	8.03794	4.75869	0.942284	0.000254021	0.02149
PTMS	protein_coding	chr12:6874682-6880118	49.3574	22.7056	0.937854	0.00122987	0.049471
LINC01846	lincRNA	chr5:97421964-97496897	0.199816	0	0.937607	0.0017783	0.0610171
MINDY1	protein_coding	chr1:150968562-150980851	8.4909	4.84908	0.931694	3.15895e-06	0.00155037
CCND3	protein_coding	chr6:41902671-42018095	24.6206	12.1794	0.931663	2.54115e-06	0.00139513
ITGA5	protein_coding	chr12:54789045-54813244	40.4149	26.1889	0.929658	0.00203905	0.0655248
PLXNB2	protein_coding	chr22:50713408-50746056	42.5986	23.6386	0.928527	0.000159426	0.0171366
RXRA	protein_coding	chr9:137208944-137332431	6.86214	3.55338	0.923752	0.000789231	0.0400005
RP11-542M13.2	lincRNA	chr16:86015356-86018329	0.306827	0.0198449	0.913367	0.00420655	0.0937841
RP11-146E13.4	lincRNA	chr14:19812176-19859970	0.160496	0	0.91251	0.00196127	0.0641065
LINC02031	lincRNA	chr3:182362002-182373668	0.130759	0	0.907839	0.00107449	0.0463096
INMT-MINDY4	protein_coding	chr7:30791753-30931696	0.0373055	0	0.903799	0.00152402	0.0560095
NBPF1	protein_coding	chr1:16888814-16940057	1.99963	1.33818	0.902428	0.00190105	0.063129
ST6GAL1	protein_coding	chr3:186648274-186796341	9.14325	5.34565	0.896156	0.000707754	0.0378935
PVR	protein_coding	chr19:45147098-45166850	6.46274	3.72447	0.895836	0.000221928	0.0203641
TPRG1L	protein_coding	chr1:3541566-3546691	7.1342	3.95357	0.894119	0.00131719	0.0513437
DPYSL2	protein_coding	chr8:26371538-26515694	24.43	11.673	0.88771	0.000584931	0.0338946
AE000661.50	lincRNA	chr14:22886826-22887647	0.285247	0	0.886058	0.00427656	0.0946219
GLT6D1	protein_coding	chr9:138515502-138531386	0.0777939	0.00163939	0.885947	0.00271519	0.0746608
AC009518.8	antisense	chr7:132515453-132534353	0.112903	0	0.885	0.00414052	0.0928808
GNS	protein_coding	chr12:65107225-65153227	20.0984	8.77075	0.884997	0.00214287	0.0675871
WASHC4	protein_coding	chr12:105501102-105562912	15.5121	9.12179	0.884758	6.54201e-05	0.0099957
ABTB1	protein_coding	chr3:127391778-127399763	4.50036	2.86078	0.884343	0.000441413	0.0294203
ZSWIM6	protein_coding	chr5:60628100-60841997	7.46249	4.52267	0.882316	9.22781e-06	0.00287411
FAM65B	protein_coding	chr6:24804510-25042246	13.2542	7.72102	0.881866	0.000212136	0.0199753
PLCH1-AS2	antisense	chr3:155203592-155204910	0.338986	0	0.880925	0.00442599	0.0964783
RP11-607P23.1	antisense	chr12:51815740-51818395	0.318937	0	0.87742	0.00350916	0.0854428
RP1-153P14.8	lincRNA	chr6:37475124-37503392	0.29718	0	0.876025	0.00381818	0.0898214
SCRN3	protein_coding	chr2:175260458-175294303	3.06426	1.87018	0.875763	0.00456075	0.0979653
DOCK10	protein_coding	chr2:225629807-225907162	12.4295	7.25031	0.875621	0.00012801	0.0152798
ARHGAP27	protein_coding	chr17:43471268-43511787	10.3998	5.91798	0.869836	0.000687328	0.0374904
RP1-158P9.1	lincRNA	chr1:56611393-56620896	0.108265	0	0.869296	0.00330538	0.0829268
UNC119	protein_coding	chr17:26873725-26879686	6.21534	3.41723	0.868386	0.000303479	0.0236874
PSTPIP1	protein_coding	chr15:77285700-77329673	8.02999	4.01509	0.867908	0.00463602	0.0990566
ZFP36	protein_coding	chr19:39897453-39900052	783.926	396.977	0.86653	0.00295908	0.0782891
OR52B6	protein_coding	chr11:5602107-5603114	0.123281	0	0.863439	0.00413391	0.0928808
RBMXL2	protein_coding	chr11:7110258-7112131	0.0888752	0	0.86215	0.00401596	0.0919556
AC104809.2	antisense	chr2:241920932-241925489	0.0492424	0	0.858961	0.00448005	0.0969391
RP11-359P5.1	antisense	chr5:122371966-122390362	0.184957	0	0.857907	0.00310609	0.0801119
RP11-323J4.1	antisense	chr4:99172839-99182781	0.375845	0	0.854888	0.00398	0.0914327
JUN	protein_coding	chr1:59246460-59249999	722.372	420.522	0.854195	0.000473348	0.0305527
NR6A1	protein_coding	chr9:127279554-127533589	2.71379	1.53367	0.851209	0.00270065	0.0746608
RP11-650K20.3	lincRNA	chr12:104235229-104238442	0.131529	0	0.849612	0.00217266	0.0679655
PRICKLE3	protein_coding	chrX:49031613-49042981	3.53232	2.06255	0.849358	0.00404655	0.0919556
SLC35F6	protein_coding	chr2:26987152-27004099	6.37802	3.36479	0.844884	0.000150965	0.0169793
SLC8B1	protein_coding	chr12:113736564-113797298	7.37691	4.12506	0.842383	0.000172641	0.0176968
RP3-466P17.2	lincRNA	chr6:146058047-146058309	0.586026	0	0.839218	0.00451957	0.0974039
CARD8	protein_coding	chr19:48684027-48759203	8.56239	5.975	0.83911	0.00177124	0.0610171
FKBP15	protein_coding	chr9:115923286-115983641	7.87297	4.11369	0.836923	7.61516e-05	0.0112123
MINK1	protein_coding	chr17:4736683-4801356	9.89704	6.13725	0.836586	0.000302343	0.0236558
ROGDI	protein_coding	chr16:4846969-4852951	12.1439	7.10047	0.835307	0.000156722	0.0170928
PLCB3	protein_coding	chr11:64018995-64036622	13.6872	7.68576	0.833632	1.27452e-05	0.00362142
MYO5A	protein_coding	chr15:52599480-52821247	8.1337	4.57098	0.830298	0.000181173	0.0182254
IRF2	protein_coding	chr4:185308867-185395734	11.5155	6.36549	0.829169	0.00423872	0.0942063
KIF1B	protein_coding	chr1:10270863-10441661	4.65783	2.35694	0.825831	0.00302728	0.0791596
REEP3	protein_coding	chr10:65281123-65384883	3.10479	1.81279	0.823279	0.00430512	0.0948925
ZHX2	protein_coding	chr8:123793633-123986752	8.32825	3.74312	0.822962	0.00369622	0.088094
RAB10	protein_coding	chr2:26256976-26360323	28.9386	16.667	0.819018	3.85112e-05	0.00710363
CAMTA2	protein_coding	chr17:4871287-4890947	6.96651	4.00722	0.817529	0.000242282	0.0209151
MAP3K10	protein_coding	chr19:40697651-40721482	2.6333	1.4964	0.813	0.00217397	0.0679655
RP11-680B3.2	antisense	chr3:148568720-148677899	0.0559994	0	0.809214	0.00342719	0.0847249
FRAT1	protein_coding	chr10:99079024-99081672	10.6395	6.54694	0.809059	0.00299033	0.0788144
CASC18	lincRNA	chr12:106097981-106137840	0.0353998	0	0.806252	0.00280337	0.0757988
AC007099.2	antisense	chr2:75701579-75709705	0.411178	0	0.804525	0.00436325	0.0956903
RP11-674P19.2	lincRNA	chr18:66879514-66881587	0.0392464	0	0.803392	0.00369868	0.088094
IFFO1	protein_coding	chr12:6647541-6665249	4.72499	3.01926	0.803108	0.00302773	0.0791596
TOM1L2	protein_coding	chr17:17746825-17875736	2.78751	1.89557	0.80297	0.00231651	0.0703907
ACSL1	protein_coding	chr4:185676749-185747972	19.3842	13.4536	0.792685	0.00156665	0.0568273
SYNE1	protein_coding	chr6:152442819-152958936	2.78683	1.76376	0.790631	0.000232204	0.0205433
GNG2	protein_coding	chr14:52292913-52446060	13.7294	7.70344	0.789981	0.00244767	0.072032
TRMT1L	protein_coding	chr1:185087230-185126204	3.67559	2.22836	0.788687	0.00444435	0.096622
SOS1	protein_coding	chr2:39208537-39351486	12.5772	7.51197	0.788508	9.12353e-06	0.00286922
FLI1	protein_coding	chr11:128556430-128683162	26.2033	15.2793	0.788335	0.000276949	0.02254
BTN3A1	protein_coding	chr6:26402465-26415444	4.99779	3.33465	0.787083	0.00354632	0.0857256
TAGAP	protein_coding	chr6:159455500-159466184	45.2126	25.6253	0.785849	0.000743131	0.038825
ATP7A	protein_coding	chrX:77166153-77305892	2.71044	1.76246	0.783296	0.000687867	0.0374904
OSBPL11	protein_coding	chr3:125247702-125313934	8.02889	4.53507	0.781679	0.00267488	0.0745652
LPP	protein_coding	chr3:187871072-188608460	3.72264	2.3198	0.780659	0.000134234	0.0157541
SLC25A37	protein_coding	chr8:23386318-23432976	7.74638	4.36935	0.780592	0.000293266	0.0233402
RNF186	protein_coding	chr1:20140522-20141771	0.0569624	0	0.77884	0.00411965	0.0926692
RGS12	protein_coding	chr4:3294755-3441640	3.87537	2.30474	0.778225	0.000299535	0.0236558
TMEM260	protein_coding	chr14:56955072-57117324	1.9638	1.18496	0.778106	0.00129386	0.0507665
S1PR4	protein_coding	chr19:3172344-3180330	18.4969	11.2887	0.77699	0.00161907	0.0575053
ZFP36L1	protein_coding	chr14:69254377-69262970	63.3658	32.6488	0.776432	0.00140912	0.0533228
C21orf59	protein_coding	chr21:33964389-33985176	2.44579	1.38866	0.776058	0.00164562	0.058153
KAT14	protein_coding	chr20:18118762-18169031	4.88012	2.94155	0.774898	0.00179704	0.0612091
APAF1	protein_coding	chr12:99038919-99129211	7.72202	4.2929	0.77365	0.0032017	0.0817254
STK38	protein_coding	chr6:36461669-36515247	24.6445	15.4334	0.771835	0.000131304	0.0155227
TSPAN14	protein_coding	chr10:82213922-82292879	9.44843	4.33764	0.767151	0.00143211	0.0538155
ENDOD1	protein_coding	chr11:94822974-94865809	7.66201	3.80445	0.76457	0.00319197	0.0816057
SLC38A9	protein_coding	chr5:54921673-55069022	1.44289	0.834391	0.76204	0.00258696	0.0732949
SLC30A6	protein_coding	chr2:32390910-32449448	2.88649	1.79593	0.761005	0.0024012	0.0714887
ACTN1	protein_coding	chr14:69340860-69446157	28.4443	15.8221	0.757027	0.00118045	0.0487095
ANKFY1	protein_coding	chr17:4067201-4167272	4.80754	3.39583	0.750784	0.00078185	0.0398842
LDLRAP1	protein_coding	chr1:25870071-25895377	4.27054	2.70948	0.746937	0.000422153	0.0293442
HLA-DMA	protein_coding	chr6:32916390-32936871	35.8568	21.3887	0.745588	0.000351641	0.0258285
ATG2A	protein_coding	chr11:64662018-64684720	7.99467	4.96853	0.742667	0.000504398	0.0316811
JAK2	protein_coding	chr9:4984390-5128183	17.0923	10.2905	0.741086	1.674e-07	0.000330863
ZFYVE16	protein_coding	chr5:79703832-79775169	2.9444	1.76463	0.739574	0.000913581	0.0434041
FYN	protein_coding	chr6:111981535-112194655	14.9155	8.99815	0.737422	3.37999e-05	0.00660432
TMEM104	protein_coding	chr17:72772622-72835918	7.80108	4.0826	0.735892	0.00468896	0.0997274
DPYD	protein_coding	chr1:97543299-98386605	10.2973	6.41013	0.73569	0.00207549	0.0661055
HLA-DPB1	protein_coding	chr6:33043703-33054978	99.0318	56.2075	0.733274	0.00284838	0.0763849
CPXCR1	protein_coding	chrX:88002226-88009786	0.0340075	0	0.729662	0.00392015	0.0907528
CEPT1	protein_coding	chr1:111682249-111727724	3.2346	2.06997	0.728159	0.00104605	0.0461388
UBXN11	protein_coding	chr1:26607819-26644854	8.82303	4.81462	0.722762	0.00241638	0.0716267
EXT1	protein_coding	chr8:118806729-119124092	3.7875	2.28736	0.720889	0.00276431	0.0753082
CROCC	protein_coding	chr1:17066768-17299474	4.96635	3.22666	0.718813	0.00378426	0.0893127
INF2	protein_coding	chr14:105155943-105188872	11.5877	6.83409	0.718194	7.14409e-06	0.00251731
USP40	protein_coding	chr2:234384166-234475428	2.24347	1.55616	0.713303	0.00467836	0.0996327
PANK4	protein_coding	chr1:2439972-2458067	4.86513	2.899	0.713058	0.000242711	0.0209151
RGCC	protein_coding	chr13:42031695-42045018	127.523	84.8468	0.710182	0.00442009	0.0964146
IPMK	protein_coding	chr10:59951278-60027694	3.79609	2.45438	0.709538	0.0028552	0.0763849
EEA1	protein_coding	chr12:93164413-93323107	8.98239	5.67306	0.707885	0.000168067	0.0175049
INPP4A	protein_coding	chr2:99061317-99210853	4.80086	3.03706	0.707861	0.000228593	0.0203983
GABPB2	protein_coding	chr1:151043054-151098018	3.19433	1.96144	0.707242	9.99343e-05	0.0131996
JUNB	protein_coding	chr19:12902310-12904129	502.232	291.264	0.706605	0.00308738	0.0798773
HIVEP2	protein_coding	chr6:143072604-143277835	8.95079	6.52858	0.705202	0.00411155	0.0926156
WDR6	protein_coding	chr3:49044495-49053386	20.962	15.7888	0.704259	0.00316452	0.0810316
FAM111A	protein_coding	chr11:58910221-58922512	15.4984	9.86341	0.701702	0.000923996	0.0435536
ACSS2	protein_coding	chr20:33459949-33515765	4.99694	2.93377	0.701581	0.00454343	0.0977229
MEF2C	protein_coding	chr5:88012934-88200074	17.1253	12.3959	0.699615	0.00460656	0.0985572
SNX27	protein_coding	chr1:151584541-151671567	8.82931	5.45583	0.697798	0.000807074	0.0402816
SNX20	protein_coding	chr16:50700211-50715264	11.3567	6.71794	0.696443	0.00126019	0.0501477
NARFL	protein_coding	chr16:779753-791329	3.25019	2.03089	0.690704	0.00314479	0.080718
MAP3K5	protein_coding	chr6:136878185-137113656	13.7839	8.94502	0.683981	9.62522e-05	0.0129908
TRIM5	protein_coding	chr11:5684787-5959849	9.00758	6.01953	0.6825	0.00358098	0.0862417
IFNAR1	protein_coding	chr21:34696782-34732168	7.09657	4.22209	0.674589	0.00353321	0.0855364
TBCE	protein_coding	chr1:235530675-235612283	9.56093	6.01922	0.670928	0.00457211	0.0980639
ARRB2	protein_coding	chr17:4613784-4624794	45.1531	24.3112	0.660048	0.00050923	0.0317209
ARPC5	protein_coding	chr1:183589981-183604892	9.07506	5.02837	0.660022	0.00342907	0.0847249
RRP12	protein_coding	chr10:99116115-99185833	29.9463	17.4911	0.658005	0.00115773	0.048342
LTBR	protein_coding	chr12:6484211-6500737	10.8316	6.38635	0.651548	0.00133822	0.0516659
IKBKB	protein_coding	chr8:42128820-42190171	7.14366	5.05554	0.650979	0.000459855	0.0300315
RECQL	protein_coding	chr12:21621845-21654603	10.0943	6.42113	0.646203	0.00158516	0.0570516
RAB11FIP3	protein_coding	chr16:475619-573011	6.09153	3.9914	0.644457	0.00121424	0.0493367
C2CD5	protein_coding	chr12:22601517-22697480	8.27561	5.69984	0.644372	0.000933138	0.0435536
SLC9A1	protein_coding	chr1:27425306-27493472	8.6135	5.33324	0.643358	0.000322344	0.0244528
RPS6KA1	protein_coding	chr1:26856252-26901521	16.3843	10.5986	0.641639	9.59697e-05	0.0129908
VAV1	protein_coding	chr19:6772725-6857377	37.0923	24.1834	0.640226	4.71233e-05	0.00807503
LARP4B	protein_coding	chr10:852854-977645	9.13384	6.39218	0.637292	0.000927498	0.0435536
ZC3H4	protein_coding	chr19:47567444-47617009	24.2411	17.8221	0.627989	0.00104977	0.0461388
PCMTD2	protein_coding	chr20:62887048-62919174	12.8221	7.86346	0.627497	0.000176604	0.0179328
ARRDC2	protein_coding	chr19:18111941-18124911	17.9261	10.4666	0.620626	0.00406487	0.0920065
ANO6	protein_coding	chr12:45609770-45834187	13.2399	7.96767	0.617849	0.000190941	0.0190306
KLHL18	protein_coding	chr3:47324407-47388306	8.99754	5.4827	0.614486	0.00310706	0.0801119
RBM41	protein_coding	chrX:106307650-106362053	5.39082	3.4735	0.610898	0.000904715	0.0431599
CEP250	protein_coding	chr20:34042985-34107108	6.9723	5.0957	0.60977	0.00248279	0.0727147
ST7L	protein_coding	chr1:113066140-113163447	2.64141	1.78869	0.608621	0.0023745	0.0710202
PCYT1A	protein_coding	chr3:195941093-196014828	6.16785	4.34221	0.608435	0.00152457	0.0560095
MTHFR	protein_coding	chr1:11845780-11866977	7.10862	4.46764	0.598505	0.00453945	0.0977229
IVNS1ABP	protein_coding	chr1:185265520-185286461	27.494	19.1728	0.597458	0.000903843	0.0431599
ITPR1	protein_coding	chr3:4535032-4889524	24.0981	18.3561	0.596666	0.00304434	0.0792702
RNH1	protein_coding	chr11:494512-507300	10.8611	6.34615	0.595788	0.00132136	0.0514441
ADGRE2	protein_coding	chr19:14843205-14889353	13.2044	9.37325	0.587276	0.00350686	0.0854428

## Sheet: Meth High vs Meth Low JMML
Gene_Name	Gene_biotype	Gene_position	FPKM.MethLow	FPKM.MethHigh	log2FC	pval	qval
LIN28B	protein_coding	chr6:105384491-105531207	0.236277	6.19634	5.99571	2.87492e-18	9.0905e-14
MANEAL	protein_coding	chr1:38259474-38266809	0.0904903	2.61129	4.5174	1.50756810794686e-10	2.97933e-07
CD96	protein_coding	chr3:111011566-111384597	2.46628	22.5963	4.49333	6.90371806022345e-10	1.0395e-06
PCDHGA7	protein_coding	chr5:140762306-140892546	0.0490362	0.819038	4.42869	8.98834e-13	5.68423e-09
PCDHGB5	protein_coding	chr5:140777554-140892546	0.0869398	1.20952	4.11686	1.75659e-08	1.37419e-05
LINC01684	lincRNA	chr21:25801054-25920256	0.2093	1.60261	4.04389	2.63911e-08	1.85441e-05
HBG2	protein_coding	chr11:5274420-5667019	5.43191	54.8682	4.00719	4.34789e-05	0.00716043
PCDHGA11	protein_coding	chr5:140800614-140892546	0.102284	0.885953	3.93678	4.43116e-11	1.27376e-07
SLC5A10	protein_coding	chr17:18853658-18925908	0.155569	1.39323	3.87903	1.7263384449207e-10	3.21099e-07
PCDHGC4	protein_coding	chr5:140864564-140892546	0.0606224	0.727943	3.82926	4.24899e-09	4.19853e-06
HBG1	protein_coding	chr11:5269313-5271122	6.47171	48.7528	3.79529	0.000231404	0.0238339
PCDHGA9	protein_coding	chr5:140782499-140892546	0.0529603	0.473832	3.75632	6.49921e-11	1.58081e-07
PCDHGA10	protein_coding	chr5:140792554-140892546	0.093436	1.02884	3.63207	1.47291e-06	0.000517484
SLAMF6	protein_coding	chr1:160454820-160493052	1.0504	5.95385	3.56942	5.60451e-07	0.00024276
PCDHGA5	protein_coding	chr5:140743799-140892546	0.0562031	0.496272	3.55748	1.1106e-07	6.2709e-05
PCDHGA6	protein_coding	chr5:140753481-140892546	0.131678	0.774855	3.48008	2.2714e-08	1.70642e-05
PCDHGB3	protein_coding	chr5:140749831-140892546	0.217496	1.41104	3.42461	6.17428e-11	1.58081e-07
TCN1	protein_coding	chr11:59620273-59634048	1.07547	12.0699	3.37758	0.00047272	0.0408399
PCDHGB7	protein_coding	chr5:140797212-140892546	0.104632	0.908581	3.3625	6.80513e-08	4.30357e-05
PCDHGB6	protein_coding	chr5:140787588-140892546	0.0755968	0.493691	3.32399	1.36587e-07	7.44633e-05
CTHRC1	protein_coding	chr8:104383743-104395225	0.30844	1.72966	3.25662	9.15835e-07	0.000376087
PTX4	protein_coding	chr16:1535887-1538982	1.44511	8.44491	3.23663	5.87445e-08	3.95213e-05
PCDHGB2	protein_coding	chr5:140739609-140892546	0.413179	3.80613	3.23179	1.12274e-05	0.00265401
LAG3	protein_coding	chr12:6881678-6887621	1.17318	2.05125	3.21485	1.53864e-05	0.00333232
PCDHGC3	protein_coding	chr5:140855514-140892546	0.244702	1.36666	3.18517	8.19478e-06	0.00210666
AGR2	protein_coding	chr7:16831435-16873057	0.201859	1.95881	3.18344	6.45476e-05	0.00967296
PCDHGB1	protein_coding	chr5:140729669-140892546	0.0102035	0.388907	3.13822	2.61055e-08	1.85441e-05
GYPA	protein_coding	chr4:145030456-145061904	0.151651	1.22969	3.10561	5.97256e-05	0.00908553
CLECL1	protein_coding	chr12:9868456-9885895	0.971259	7.8296	3.03147	0.00015372	0.0180693
TENM1	protein_coding	chrX:123509753-124097666	0.0853187	1.14448	3.02435	0.00141627	0.0876368
HOXA1	protein_coding	chr7:27132612-27135615	0.328245	2.43433	3.01125	9.2382e-05	0.0125232
PYHIN1	protein_coding	chr1:158900586-158946844	0.268853	1.98305	2.99197	2.4084e-05	0.00467201
WT1	protein_coding	chr11:32409321-32457176	1.03928	4.94642	2.96634	0.000226536	0.0234248
JPH1	protein_coding	chr8:75146935-75233563	0.345127	1.27395	2.95841	1.59177e-06	0.000542125
PLEKHG5	protein_coding	chr1:6526152-6580121	0.184176	1.4006	2.95513	1.40318e-06	0.000504187
PCSK6	protein_coding	chr15:101837347-102065405	0.318425	0.412021	2.88573	0.000521507	0.0436245
MIR646HG	lincRNA	chr20:58662895-59102516	0.499779	2.27692	2.8634	2.37699e-06	0.000736867
MYRF	protein_coding	chr11:61520114-61555990	0.092054	0.382718	2.85986	4.55905e-05	0.00743079
PCDHGA8	protein_coding	chr5:140769724-140892546	0.112741	0.271974	2.85058	3.90969e-05	0.00661084
IL2RA	protein_coding	chr10:6052652-6104288	3.37023	6.08221	2.82711	2.61822e-05	0.0049215
WT1-AS	antisense	chr11:32457064-32480315	0.157838	1.50869	2.79122	0.000758664	0.0582256
TRIM71	protein_coding	chr3:32859510-32939318	1.12561	4.48489	2.7722	3.05031e-06	0.000893063
MDFI	protein_coding	chr6:41604620-41621984	0.325047	1.7362	2.76946	0.000192899	0.0213259
SH2D1A	protein_coding	chrX:123361718-123507047	1.12148	5.14909	2.74066	0.000901155	0.0652049
CD7	protein_coding	chr17:80272744-80275478	5.15242	32.2235	2.72668	2.74523e-07	0.000129559
LINC01478	lincRNA	chr18:41903401-42111662	0.117526	1.22382	2.72224	0.000175839	0.0200723
PDZRN4	protein_coding	chr12:41582250-41968392	0.0437036	1.18366	2.67577	0.000620437	0.0496664
STRA6	protein_coding	chr15:74471807-74504608	0.0305317	0.232601	2.66119	3.93055e-05	0.00661084
CAPNS2	protein_coding	chr16:55600584-55601599	0.29636	1.5766	2.65334	1.05084e-05	0.00255597
SLCO4C1	protein_coding	chr5:101569690-101632253	0.274569	1.05206	2.64339	2.63473e-05	0.0049215
C20orf197	lincRNA	chr20:58630980-58648008	1.184	4.02178	2.63755	9.04544e-07	0.000376087
CPA6	protein_coding	chr8:68334273-68658620	0.132245	0.553867	2.61625	7.8428e-05	0.0112212
THY1	protein_coding	chr11:119288088-119295695	0.108531	0.358662	2.6082	0.000384486	0.0346366
MSS51	protein_coding	chr10:75183337-75193319	1.04971	4.04848	2.58036	4.97289e-05	0.00790165
CLEC9A	protein_coding	chr12:10183276-10218626	1.32481	6.06329	2.56801	9.98299e-05	0.0132631
CTD-2575K13.6	protein_coding	chr19:42411857-42432668	0.195717	1.20749	2.56272	0.0002081	0.0221553
LGALS12	protein_coding	chr11:63273556-63284246	2.05113	4.2975	2.52157	0.000284516	0.0282018
ANKFN1	protein_coding	chr17:53959662-54589020	0.188681	0.728033	2.51853	0.000524709	0.0437765
CD28	protein_coding	chr2:204571198-204603635	0.175882	0.514546	2.51845	0.000108873	0.0140513
ITGAD	protein_coding	chr16:31404633-31437826	0.162532	1.11099	2.51045	0.00108891	0.074046
TWIST1	protein_coding	chr7:19060614-19157295	0.0849283	1.45377	2.50667	0.000235023	0.0239724
LA16c-312E8.5	protein_coding	chr16:1481036-1483398	0.445996	2.59987	2.49251	0.000565181	0.0464182
LINC01934	lincRNA	chr2:181966659-182264286	0.327302	1.06534	2.4803	0.000418755	0.0370897
LINC01268	lincRNA	chr6:114189178-114194516	1.25433	3.9026	2.44388	2.77726e-06	0.000836352
GPR141	protein_coding	chr7:37723399-37873390	0.568075	2.31094	2.41992	0.000431365	0.0379938
ROR2	protein_coding	chr9:94325373-94712444	0.579049	2.44569	2.40831	0.000115134	0.0145336
REG4	protein_coding	chr1:120336641-120354283	0.0778337	0.624957	2.39556	0.000822395	0.0613318
CD248	protein_coding	chr11:66081958-66084515	1.36745	5.65846	2.37865	0.00120657	0.0791533
NR5A1	protein_coding	chr9:127243515-127269709	0.265951	1.05695	2.37555	0.000155524	0.0181464
CREB3L3	protein_coding	chr19:4153598-4173051	0.244156	0.804231	2.36553	0.000324266	0.03059
ADGRG6	protein_coding	chr6:142622991-142767403	0.53016	1.56893	2.35995	0.00115695	0.0773979
AMIGO1	protein_coding	chr1:110046797-110052360	0.103674	0.381881	2.358	7.58703e-05	0.0110047
SPP1	protein_coding	chr4:88896802-88904578	0.52064	1.55018	2.32634	0.000451685	0.039237
KIR3DL3	protein_coding	chr19:55235984-55248003	0	0.750777	2.31942	0.000284427	0.0282018
RP11-539L10.2	lincRNA	chr4:6689175-6692246	0.19568	0.795272	2.31498	0.000375464	0.0340177
AC019048.1	antisense	chr2:7202858-7218011	0.0122235	5.54647	2.31416	0.00107683	0.0733866
PCDHGA4	protein_coding	chr5:140734592-140892546	0.0150786	0.416083	2.3108	6.56655e-05	0.00979408
LINC01426	antisense	chr21:36118054-36157183	0.0271646	0.261501	2.29786	2.90067e-05	0.0052825
CACNG4	protein_coding	chr17:64961026-65029514	0.0697393	0.613265	2.29544	0.00136358	0.0858891
TBC1D30	protein_coding	chr12:65174973-65274812	0.0298876	0.149281	2.2837	0.000111314	0.01425
C19orf45	protein_coding	chr19:7557862-7573336	0.411319	1.52337	2.27312	0.00115779	0.0773979
OR3A2	protein_coding	chr17:3181193-3182268	0.0478695	1.96136	2.26541	0.000398122	0.0354609
PRKCA	protein_coding	chr17:64298754-64806861	1.34135	5.21271	2.25624	7.38463329420707e-10	1.06137e-06
SOAT2	protein_coding	chr12:53497302-53518322	0.1868	0.756634	2.2479	0.000422887	0.0373511
CTSE	protein_coding	chr1:206317459-206332104	0.221033	0.816737	2.24391	0.00140657	0.0873788
RP11-204L24.2	antisense	chr2:122287998-122290281	0.191222	1.25805	2.22855	8.72662e-05	0.0121558
LRRC4	protein_coding	chr7:127667124-127672160	0.70762	2.06996	2.22379	0.000135189	0.0162535
PRF1	protein_coding	chr10:72357104-72362531	2.67515	6.92211	2.21981	8.4488e-05	0.0118208
GYG2	protein_coding	chrX:2746829-2800861	0.514864	0.988235	2.21362	0.000472409	0.0408399
MAP3K9	protein_coding	chr14:71189243-71276251	0.517414	2.0611	2.21277	5.93389e-05	0.00908553
RP11-366L20.2	antisense	chr12:66245120-66275947	0.750477	3.94062	2.20784	0.000699821	0.054909
SPAG6	protein_coding	chr10:22634374-22743153	0.618633	4.09825	2.20775	0.0011735	0.0777907
SLFN12L	protein_coding	chr17:33791268-33864880	0.236995	0.844532	2.19962	0.000484972	0.0415578
RP11-1191J2.5	antisense	chr4:654998-655734	1.01323	2.98059	2.18833	9.723e-05	0.0130272
RUNDC3A	protein_coding	chr17:42385781-42396039	0.0655758	0.429515	2.18414	0.00139156	0.0871312
C2orf66	protein_coding	chr2:197669726-197675000	0.0805448	0.670925	2.17091	0.000679394	0.0537061
RP11-142C4.6	antisense	chr11:58701116-58826132	0.481915	1.61024	2.16415	0.000153668	0.0180693
TMPRSS13	protein_coding	chr11:117771358-117800174	0.141562	0.280006	2.16018	0.000369891	0.0336091
RP5-1033H22.2	antisense	chr1:94057756-94071130	0.531416	1.82833	2.15758	0.000900349	0.0652049
CD276	protein_coding	chr15:73976307-74006859	0.5364	1.09789	2.12224	0.000290842	0.0286493
PRAME	protein_coding	chr22:22890123-22901768	0.0490712	0.380385	2.12121	0.000718233	0.0562142
KLHDC7B	protein_coding	chr22:50986462-50989452	1.6938	3.91915	2.11502	0.000187763	0.0209051
TFAP2E	protein_coding	chr1:36038971-36060929	0.717161	1.94939	2.11374	0.000187252	0.0209051
KCNH4	protein_coding	chr17:40308909-40333296	0.332166	0.944909	2.10077	0.000893977	0.0651326
RP6-159A1.3	antisense	chrX:65219593-65220913	0.622212	1.71113	2.09812	0.00143093	0.0879777
RP11-102M11.2	antisense	chr3:136471472-136474622	0.244269	0.607679	2.08259	0.000602496	0.0484775
CLLU1OS	protein_coding	chr12:92813870-92821924	0.0787206	1.82521	2.07851	0.00121459	0.0791561
AGBL2	protein_coding	chr11:47681143-47736941	0.383041	0.94079	2.0758	2.52741e-05	0.00478543
PLEKHG3	protein_coding	chr14:65170820-65216965	1.11257	2.78028	2.0726	1.71831e-05	0.00359822
SERPINF2	protein_coding	chr17:1646130-1658562	0.338081	0.773193	2.06677	0.000881698	0.0643863
RP11-127B20.3	antisense	chr4:83295454-83305180	0.769588	2.62417	2.06519	0.000555218	0.0458381
AC003991.3	antisense	chr7:87848674-87933682	0.072384	0.234894	2.06373	0.000796257	0.0600899
LINC01122	lincRNA	chr2:58654934-59290901	0.611924	2.69902	2.04904	0.000391371	0.0351567
SVOPL	protein_coding	chr7:138279030-138386097	0.32287	0.917426	2.04876	0.000113238	0.0144379
PLEKHH3	protein_coding	chr17:40819932-40829012	0.531648	1.95411	2.04634	0.000355759	0.0327962
AC011899.9	antisense	chr7:157647221-157658784	1.13609	2.58379	2.04076	0.000233867	0.0239316
RP11-426C22.8	lincRNA	chr16:29283541-29284093	0.0349645	1.54182	2.02747	0.000118174	0.0147113
RP11-79O8.1	lincRNA	chr2:20101786-20102330	0.472076	2.41561	2.02407	0.00104575	0.0720403
MFAP4	protein_coding	chr17:19286755-19290553	5.08332	15.7789	2.02321	0.000203832	0.0218752
RP11-473M20.16	lincRNA	chr16:3206737-3207484	0.857632	2.9018	2.01354	0.000873752	0.0642513
RP11-85E16.1	lincRNA	chr7:36773609-36774140	0.100005	1.66955	2.01103	0.000201955	0.0217946
FCRL4	protein_coding	chr1:157543539-157567870	0.00595332	0.431869	1.99538	0.00107689	0.0733866
VSIG10L	protein_coding	chr19:51834790-51845378	0.482153	1.17447	1.99193	0.00018189	0.0204555
NPM2	protein_coding	chr8:21881636-21894408	1.48535	3.34383	1.96176	0.000576638	0.046993
AF196970.3	antisense	chrX:48557354-48595570	0.623857	2.44865	1.95984	0.00117857	0.0778003
CTD-2017F17.2	antisense	chr15:65243131-65243670	5.44856	11.1667	1.95415	0.00170904	0.0995211
IQSEC3	protein_coding	chr12:175931-287626	1.55419	5.0497	1.95323	1.36995e-05	0.00311639
HPGD	protein_coding	chr4:175411328-175444305	2.79881	8.47772	1.93387	0.000155106	0.0181464
GNA14	protein_coding	chr9:80037995-80263223	0.101352	0.334887	1.93239	0.0013221	0.0843982
GCC2-AS1	antisense	chr2:109123971-109150652	0.268031	1.16698	1.93111	0.000653651	0.0518006
TSSK6	protein_coding	chr19:19623227-19626494	0.591446	1.53	1.93078	0.000573068	0.0469378
LINC00654	lincRNA	chr20:5476713-5485259	0.677345	1.30093	1.91681	0.000479651	0.0412347
LAX1	protein_coding	chr1:203734304-203745361	2.19626	6.91516	1.91326	1.47007e-06	0.000517484
TCF7	protein_coding	chr5:133450402-133487556	1.8375	8.50486	1.90229	0.000290825	0.0286493
ZNF433	protein_coding	chr19:12125547-12146556	0.52025	1.513	1.89999	0.00011114	0.01425
CTB-13F3.1	antisense	chr7:107582561-107583185	0.19236	1.70598	1.86861	0.000808008	0.060687
RP11-326C3.11	antisense	chr11:318640-325631	1.08812	2.55252	1.85567	0.00162668	0.0961411
ZNF185	protein_coding	chrX:152082986-152142024	1.92418	6.02289	1.83975	3.19005e-05	0.00566683
LINC01360	lincRNA	chr1:73771853-73820936	0	0.0812688	1.82926	0.000343277	0.0321137
HOOK1	protein_coding	chr1:60280458-60342050	1.99562	4.09562	1.82083	0.000479898	0.0412347
LINC02024	lincRNA	chr3:117397540-117409779	0.0376221	1.37695	1.81599	0.00130207	0.0833427
TMEM191C	protein_coding	chr22:21820712-21825558	0.0064685	0.18017	1.81558	0.00156738	0.0931592
C17orf97	protein_coding	chr17:260118-280853	0.535017	1.58663	1.81383	0.00113286	0.0763776
ZNF221	protein_coding	chr19:44455375-44471861	1.10668	2.29818	1.80119	0.00100529	0.0701703
RP11-706O15.3	lincRNA	chrX:3771051-3800358	0.922909	2.40601	1.79912	9.26184e-05	0.0125232
CEP83-AS1	lincRNA	chr12:94853779-94856260	0.632061	1.22127	1.79628	0.00102242	0.070897
FAM72C	protein_coding	chr1:149438750-149459549	0.0111652	0.502788	1.75163	0.00100277	0.0701498
LINC01410	lincRNA	chr9:66457285-66469310	0.654866	1.2603	1.73704	0.000946233	0.0669349
RP11-212I21.4	lincRNA	chr16:55572112-55575939	0.542717	1.41311	1.73612	0.000442171	0.0386228
AC004535.2	lincRNA	chr7:10742303-10747033	0.0186841	0.849144	1.72239	0.00119619	0.0786349
TOGARAM2	protein_coding	chr2:29179477-29284239	0.123902	0.25689	1.71142	0.00165153	0.0971419
TNFRSF25	protein_coding	chr1:6521211-6526255	2.08728	3.92272	1.70973	8.42251e-05	0.0118208
FIGNL2	protein_coding	chr12:52211624-52242550	0.234592	0.48699	1.68775	0.00121663	0.0791561
RP3-395M20.8	antisense	chr1:2481359-2488470	0.552973	1.02328	1.64685	0.00128648	0.0825292
RORA-AS1	antisense	chr15:60771377-60922836	0.909965	1.77166	1.59156	0.000932058	0.0663026
C1orf186	protein_coding	chr1:206238872-206304137	3.75413	10.6278	1.58144	0.000493937	0.0419882
ADGRG3	protein_coding	chr16:57702099-57723290	1.26202	2.38403	1.58131	0.00139895	0.0872451
CBX8	protein_coding	chr17:77765931-77775482	0.886452	2.29887	1.57567	0.000104587	0.0136787
TTLL7	protein_coding	chr1:84330711-84464833	0.445567	1.39957	1.56642	0.00162257	0.0960782
MAP3K14-AS1	antisense	chr17:43325292-43345997	0.524176	1.10432	1.55573	0.000314044	0.0300911
RP11-1275H24.3	lincRNA	chr7:5468362-5469303	4.88102	10.6373	1.54558	0.000986776	0.0696441
RP3-460G2.2	lincRNA	chr6:141167095-141174061	0.0407817	1.36935	1.53679	0.000933101	0.0663026
TESC	protein_coding	chr12:117476728-117537284	13.6839	34.9603	1.5294	2.28116e-05	0.00461455
CCL5	protein_coding	chr17:34198495-34207797	10.3148	20.1836	1.49598	0.000224463	0.0234242
RP4-728D4.2	antisense	chr1:36035414-36043330	5.0631	11.0608	1.46707	0.00018032	0.0204363
TSPAN5	protein_coding	chr4:99391518-99579780	0.89706	1.67315	1.4569	0.00109233	0.0741193
NRARP	protein_coding	chr9:140194934-140196703	4.03455	8.43743	1.43093	0.000732776	0.0569296
MECOM	protein_coding	chr3:168801287-169381406	4.11989	11.6551	1.40598	2.30581e-05	0.00461455
SEMA7A	protein_coding	chr15:74701630-74726808	5.11975	8.90772	1.37581	0.000293088	0.0287809
CCDC136	protein_coding	chr7:128430811-128462186	3.35875	9.01447	1.35455	1.59449e-06	0.000542125
LMO4	protein_coding	chr1:87794151-87814606	6.62686	23.162	1.3516	0.00034045	0.0319437
GGT1	protein_coding	chr22:24979718-25024972	0.724878	1.54469	1.34287	0.0015085	0.0903385
TTN	protein_coding	chr2:179390716-179695529	1.54418	3.4076	1.34207	1.78849e-05	0.00372052
CCDC141	protein_coding	chr2:179694996-179914813	1.7085	3.74307	1.33809	4.95418e-05	0.00790165
HEMGN	protein_coding	chr9:100689073-100707138	22.904	41.7237	1.32864	0.000602655	0.0484775
RP11-265E18.1	lincRNA	chr7:32885006-32885673	0.0235181	0.608744	1.28832	0.00134408	0.08517
FBN2	protein_coding	chr5:127593601-127994878	1.18498	2.10188	1.22542	0.000634522	0.050538
TAAR8	protein_coding	chr6:132873832-132874860	0	0.242554	1.18674	0.001517	0.0906756
AC002306.1	antisense	chr19:19717159-19719469	0	0.265288	1.16655	0.00146794	0.08892
HMGA2	protein_coding	chr12:66217911-66360075	1.96302	4.75037	1.15866	0.000368568	0.0335948
RP5-857K21.4	lincRNA	chr1:521369-763176	0.000861125	0.0298647	1.14581	0.00156057	0.0929289
LPCAT2	protein_coding	chr16:55542910-55620582	4.61081	10.6281	1.10573	0.00012194	0.0149447
ADAM28	protein_coding	chr8:24151553-24216531	4.71076	9.36458	1.09191	4.65298e-05	0.00754498
LGALS3BP	protein_coding	chr17:76967320-76976191	32.0096	64.8586	1.08429	1.70924e-06	0.000574959
TTC9	protein_coding	chr14:71108504-71142077	3.77342	7.6899	1.0697	1.49188e-05	0.00325333
PTPN13	protein_coding	chr4:87515468-87736324	1.1424	2.3947	1.06235	0.00121499	0.0791561
ZC3HAV1L	protein_coding	chr7:138710452-138720775	4.46259	8.50329	1.05106	0.00116483	0.0775412
AKR1C3	protein_coding	chr10:5077546-5149878	1.59357	3.38017	1.03934	0.00140166	0.0872451
ZNF717	protein_coding	chr3:75758794-75834734	1.13854	2.38492	1.03885	0.000399589	0.0354916
ARID3A	protein_coding	chr19:925781-975939	6.52024	13.6201	1.03672	5.75156e-06	0.00152827
MGAT4A	protein_coding	chr2:99235569-99347589	1.37917	2.71858	1.02953	0.00020658	0.0220678
PIP4K2C	protein_coding	chr12:57984957-57997201	2.87813	4.96185	1.02653	0.00116793	0.0775841
APOBR	protein_coding	chr16:28505970-28510291	11.3495	22.6331	1.00581	0.000692441	0.0544651
PREPL	protein_coding	chr2:44543420-44589001	2.92762	5.66645	0.996604	8.88831e-06	0.00224839
PITPNM1	protein_coding	chr11:67259239-67273734	6.19239	10.8573	0.982758	9.80063e-06	0.00240229
ZNF844	protein_coding	chr19:12175514-12192380	4.29597	7.65428	0.921522	8.78236e-05	0.0121798
KIF21B	protein_coding	chr1:200938518-200992828	4.18447	7.81216	0.896617	6.23301e-07	0.000266335
DGKQ	protein_coding	chr4:952675-980683	2.58009	4.37845	0.863893	0.000325055	0.03059
PRPSAP2	protein_coding	chr17:18743398-18834600	3.09569	5.33001	0.861529	0.000835073	0.0618385
ATG10	protein_coding	chr5:81267844-81572676	1.61451	2.69303	0.860724	0.00123435	0.0799797
ZNF469	protein_coding	chr16:88493879-88507165	2.05637	3.31088	0.843403	0.000785495	0.0595509
ARHGAP18	protein_coding	chr6:129897277-130031370	5.11689	9.1385	0.833854	0.000583145	0.0472796
IGF2BP2	protein_coding	chr3:185361527-185542844	20.3063	38.3993	0.824737	1.37525e-06	0.000499833
TRAF3IP3	protein_coding	chr1:209929377-209955665	7.2762	11.9423	0.808162	0.00126697	0.0815918
PURA	protein_coding	chr5:139487362-139505204	1.88487	3.20331	0.787771	1.45604e-05	0.00319722
DENND1C	protein_coding	chr19:6467218-6482568	10.2122	17.1914	0.78703	1.31958e-06	0.000485175
TMEM44	protein_coding	chr3:194308402-194354418	4.33684	7.50054	0.783278	0.00145021	0.0883539
NOP14-AS1	antisense	chr4:2936626-2963465	2.10198	4.05797	0.782955	0.000782615	0.0595509
PIP5K1C	protein_coding	chr19:3630181-3700477	6.21969	9.20429	0.778589	0.00099114	0.0696441
CD244	protein_coding	chr1:160799950-160832645	11.7783	18.4684	0.767807	0.00121209	0.0791561
DICER1	protein_coding	chr14:95552565-95624347	12.3763	20.1665	0.759691	1.10565e-07	6.2709e-05
TBKBP1	protein_coding	chr17:45771447-45789416	4.78294	8.08399	0.759109	0.000321591	0.03059
ADCY7	protein_coding	chr16:50280048-50352046	14.3951	22.9694	0.748128	0.000324604	0.03059
SDHC	protein_coding	chr1:161284047-161345130	1.03157	1.69024	0.742057	0.00027087	0.0271041
PARP3	protein_coding	chr3:51976361-51982883	4.01562	6.53975	0.736676	0.000855942	0.0630883
OSBPL3	protein_coding	chr7:24836158-25021253	5.50413	8.76004	0.7336	0.000828084	0.0614648
BCORL1	protein_coding	chrX:129115083-129192058	6.61787	11.3674	0.731214	1.93215e-06	0.000623415
ATP6V1C1	protein_coding	chr8:104033291-104085279	2.91008	4.98637	0.721665	0.00136338	0.0858891
WDR81	protein_coding	chr17:1619817-1641893	5.74411	8.77282	0.719267	0.000629974	0.0503025
XPO1	protein_coding	chr2:61704984-61765761	16.3784	27.881	0.716777	1.59649e-05	0.00342762
CLIP2	protein_coding	chr7:73703805-73820273	21.295	34.7396	0.716037	0.000296186	0.0289693
FNBP1L	protein_coding	chr1:93913688-94020218	7.21491	12.554	0.713237	0.00025844	0.0259424
ZADH2	protein_coding	chr18:72907063-72921303	4.76318	8.10663	0.710663	0.00051025	0.0429098
STK38L	protein_coding	chr12:27396901-27478892	7.5266	12.6945	0.693767	2.77681e-06	0.000836352
PCCA	protein_coding	chr13:100741269-101182691	2.75886	4.3127	0.683815	0.00117727	0.0778003
TOX	protein_coding	chr8:59717977-60031767	15.9572	26.719	0.681542	0.000124899	0.0152483
CCDC88B	protein_coding	chr11:64107695-64125006	8.30232	13.2963	0.680614	0.00137509	0.0862706
GRIK5	protein_coding	chr19:42502473-42573650	9.11861	15.3977	0.669415	7.66267e-05	0.0110141
PDK1	protein_coding	chr2:173420101-173473397	2.5547	4.42828	0.668562	9.76912e-05	0.0130337
AKAP10	protein_coding	chr17:19807615-19881656	7.04364	10.8339	0.667767	3.33862e-05	0.00586484
NAGLU	protein_coding	chr17:40688190-40696467	2.74041	4.55011	0.667445	0.000592508	0.0479158
CCDC125	protein_coding	chr5:68576002-68628636	3.15807	5.01165	0.663256	7.29734e-05	0.0108329
GMCL1	protein_coding	chr2:70056774-70108528	5.51601	8.55485	0.636016	0.00022547	0.0234248
ITGA4	protein_coding	chr2:182321929-182400914	80.7547	133.323	0.62717	2.11282e-05	0.00433814
ATP11A	protein_coding	chr13:113344643-113541482	6.03784	9.11258	0.627079	2.79501e-05	0.00516832
SH3BP1	protein_coding	chr22:38030661-38062939	10.475	16.2396	0.624252	0.00135406	0.085631
DNMT3A	protein_coding	chr2:25450724-25565459	17.2	26.9372	0.60633	0.000213421	0.0226455
GMIP	protein_coding	chr19:19740285-19754476	22.8121	32.8901	0.593896	0.000201651	0.0217946
PXDN	protein_coding	chr2:1635659-1748624	7.97148	0.23595	-6.55331	2.24746e-12	1.01521e-08
MGST1	protein_coding	chr12:16500076-16762193	2.45395	0.125392	-5.81665	1.08195e-11	3.80125e-08
C8orf88	protein_coding	chr8:91970865-91997485	12.0341	0.362719	-5.69104	2.1883e-12	1.01521e-08
LCA5	protein_coding	chr6:80194708-80247175	2.83147	0.0782651	-5.62378	5.81849328352217e-10	9.6832e-07
NUDT11	protein_coding	chrX:51232863-51239448	3.29661	0.156226	-5.49512	3.47983e-16	2.7508e-12
MAMDC2	protein_coding	chr9:72658497-72841886	6.32725	0.199353	-5.37257	6.94963e-07	0.000292996
ROBO1	protein_coding	chr3:78646390-79816965	2.75451	0.206961	-5.2112	2.02164e-07	9.98818e-05
ARHGAP32	protein_coding	chr11:128834955-129149219	3.80003	0.193029	-5.13575	2.42034e-16	2.55104e-12
SH3BGRL2	protein_coding	chr6:80341000-80413376	2.05627	0.131577	-4.98274	8.81144767732081e-10	1.21138e-06
CDC42BPA	protein_coding	chr1:227177566-227506175	7.88854	0.609658	-4.97405	1.03637e-07	6.0685e-05
ZNF704	protein_coding	chr8:81540686-81787016	3.59146	0.795759	-4.93485	3.53063e-09	3.60124e-06
STK33	protein_coding	chr11:8413415-8615836	1.93035	0.279506	-4.70792	8.46199e-12	3.3446e-08
FSTL1	protein_coding	chr3:120111140-120170100	4.97114	0.512074	-4.68562	2.82872e-09	3.08427e-06
PLS3	protein_coding	chrX:114795501-114885181	2.93329	0.308579	-4.62727	2.96746e-09	3.12771e-06
ARHGEF11	protein_coding	chr1:156904632-157015162	4.28669	0.773916	-4.59295	8.20685e-09	7.20835e-06
FCER1A	protein_coding	chr1:159259504-159278014	26.6443	2.72524	-4.49981	0.00019163	0.0212609
PKP2	protein_coding	chr12:32943679-33049774	0.960766	0.0647418	-4.48113	2.58146e-09	2.91521e-06
EPB41L3	protein_coding	chr18:5392380-5630699	1.95255	0.0739381	-4.45295	5.97657e-05	0.00908553
WWC2	protein_coding	chr4:184020446-184241930	1.45594	0.283095	-4.36263	1.38786e-08	1.18605e-05
SGMS2	protein_coding	chr4:108745719-108836203	1.36948	0.151405	-4.3536	9.69471e-06	0.0023949
ZNF718	protein_coding	chr4:124362-157779	3.72323	1.9427	-4.27194	3.45611e-07	0.000156117
NPTX2	protein_coding	chr7:98246609-98259180	6.7444	0.385242	-4.24905	0.00030847	0.0296979
STAC	protein_coding	chr3:36421836-36589499	1.23925	0.104355	-4.24801	1.8035e-09	2.19333e-06
ABHD17C	protein_coding	chr15:80972025-81047962	2.01613	0.123561	-4.18161	1.34393e-07	7.44633e-05
SRGAP3	protein_coding	chr3:9022275-9404737	0.871195	0.125454	-4.16816	2.42647e-11	7.67251e-08
F13A1	protein_coding	chr6:6144318-6321246	5.923	0.328937	-4.15894	3.18048e-05	0.00566683
MAP3K21	protein_coding	chr1:233463514-233520894	1.33196	0.240103	-4.15734	2.20362e-09	2.58069e-06
GOLM1	protein_coding	chr9:88641061-88715088	5.96152	0.384039	-4.13934	0.000171055	0.0195969
TBC1D12	protein_coding	chr10:96162261-96295687	1.04363	0.031887	-4.13681	1.44879e-08	1.20554e-05
NDN	protein_coding	chr15:23930547-23932477	2.71488	0.353785	-4.10706	9.10796e-08	5.53834e-05
NEFH	protein_coding	chr22:29876219-29887379	5.23514	1.21421	-4.08881	2.5254e-05	0.00478543
EREG	protein_coding	chr4:75230860-75254468	13.6817	1.34387	-4.03237	0.000127248	0.0154753
CLDN10	protein_coding	chr13:96085858-96232013	1.2238	0.0233493	-4.03214	7.75585e-09	7.00686e-06
PBX1	protein_coding	chr1:164524821-164868533	2.03299	0.254732	-4.02538	4.33623e-06	0.00122024
ZNF711	protein_coding	chrX:84499038-84528368	22.5614	4.83846	-4.02201	1.15791171405646e-10	2.44088e-07
SMIM10	protein_coding	chrX:134124968-134126503	8.68355	1.54734	-3.98337	2.08785e-06	0.000660177
CPVL	protein_coding	chr7:29034847-29235067	12.9611	2.18272	-3.97746	9.42882e-07	0.000381342
GPHN	protein_coding	chr14:66974125-67648520	4.29754	0.859733	-3.9713	1.95118160011328e-10	3.42758e-07
MYLK	protein_coding	chr3:123328896-123603178	4.40991	0.410676	-3.96664	0.000368671	0.0335948
LGR4	protein_coding	chr11:27387508-27494322	0.579281	0.0752928	-3.94079	1.59631e-09	2.10314e-06
FAM92A	protein_coding	chr8:94710789-94743755	0.823288	0.111269	-3.92219	3.23795e-07	0.000150565
LHFP	protein_coding	chr13:39917029-40177665	4.38132	0.904447	-3.87372	5.45727e-07	0.000239665
SCN9A	protein_coding	chr2:167051695-167232503	1.93022	0.197953	-3.86423	1.59426e-06	0.000542125
ADCY9	protein_coding	chr16:4003388-4166186	1.25518	0.190948	-3.85818	1.51624e-07	7.99059e-05
NUP62CL	protein_coding	chrX:106366657-106449663	3.29389	0.25397	-3.85059	2.20133e-06	0.00068917
DSG2	protein_coding	chr18:29078006-29128971	8.78262	2.68072	-3.84047	1.7949e-07	9.30404e-05
IGFBP2	protein_coding	chr2:217497551-217529159	4.24102	0.206162	-3.82268	0.000757974	0.0582256
ADAMTS3	protein_coding	chr4:73146686-73435103	1.59309	0.229696	-3.81735	4.86784e-05	0.00785311
GABBR1	protein_coding	chr6:29523406-29601753	2.36511	0.32362	-3.81388	5.81208e-05	0.00896478
PAIP2B	protein_coding	chr2:71409869-71454213	1.08032	0.175693	-3.80884	2.32056e-08	1.70642e-05
MYO1D	protein_coding	chr17:30819540-31204195	1.89474	0.133153	-3.77885	0.000296839	0.0289693
EDARADD	protein_coding	chr1:236511557-236648214	2.13978	0.306289	-3.77796	1.74448e-06	0.000580637
ZNF205	protein_coding	chr16:3162561-3170518	1.3142	0.022534	-3.75938	5.76428e-09	5.52323e-06
PLOD2	protein_coding	chr3:145787227-145881440	1.86207	0.423148	-3.74494	1.42409e-05	0.0031711
INPP5J	protein_coding	chr22:31518717-31530682	0.597911	0.0419113	-3.69379	1.78184e-08	1.37419e-05
EPCAM	protein_coding	chr2:47572297-47614740	7.95567	0.848303	-3.68642	0.00139483	0.0871632
SLC7A11	protein_coding	chr4:139085251-139163503	0.783157	0.0696968	-3.67177	6.35899e-05	0.00957482
AK4	protein_coding	chr1:65613232-65697828	1.30496	0.20677	-3.66872	2.38031e-05	0.00466215
ZDBF2	protein_coding	chr2:207139387-207179152	2.47392	0.698505	-3.66413	9.30701e-06	0.00233562
KLHL13	protein_coding	chrX:117031776-117251303	0.867032	0.366295	-3.65833	1.65058e-05	0.00350278
NPY	protein_coding	chr7:24323782-24331484	9.30401	0.0794674	-3.6487	6.28557e-06	0.00165625
WDR17	protein_coding	chr4:176986985-177103969	0.883051	0.139827	-3.64498	1.84598e-07	9.41448e-05
SPOCK3	protein_coding	chr4:167654535-168155947	1.01337	0.295751	-3.6315	3.01704e-06	0.000891578
MPDZ	protein_coding	chr9:13105703-13279589	0.957162	0.122954	-3.57682	2.36717e-05	0.00466215
LAMB2	protein_coding	chr3:49158547-49170551	3.99971	0.206938	-3.5593	0.000506258	0.0426877
NUDT10	protein_coding	chrX:51075083-51080377	1.9431	0.289379	-3.51665	4.71466e-06	0.00129633
RP11-382A20.3	protein_coding	chr15:83781490-83876770	3.79693	0.501648	-3.51373	8.77139e-17	1.38676e-12
FAAH	protein_coding	chr1:46859937-46879520	4.53287	0.55793	-3.48413	1.27973e-06	0.00047606
BEND6	protein_coding	chr6:56819924-56892140	0.758826	0.171444	-3.41788	4.43804e-05	0.00727103
RAB38	protein_coding	chr11:87846410-87908635	2.2785	0.166165	-3.36779	2.44577e-07	0.000117174
PLEKHG4B	protein_coding	chr5:92266-190087	0.972604	0.148177	-3.34748	4.94346e-05	0.00790165
CLEC14A	protein_coding	chr14:38723308-38725574	1.13934	0.0402466	-3.34673	4.08883e-07	0.000182097
MAGI3	protein_coding	chr1:113933371-114228545	1.48354	0.20236	-3.31684	1.79114e-09	2.19333e-06
LRCH2	protein_coding	chrX:114345179-114468635	0.454069	0.0510478	-3.27648	1.03988e-06	0.00040594
CGREF1	protein_coding	chr2:27321757-27341983	3.14244	0.607405	-3.26767	1.01631e-06	0.000401698
NKD2	protein_coding	chr5:1008944-1039058	1.90484	0.169995	-3.24376	7.42534e-05	0.0108699
STXBP1	protein_coding	chr9:130341649-130458306	0.797944	0.184743	-3.23333	9.45103e-06	0.00235308
ZC2HC1A	protein_coding	chr8:79578282-79632000	1.19136	0.291077	-3.22335	1.09401e-06	0.000421862
AASS	protein_coding	chr7:121715701-121784334	1.38188	0.249664	-3.20826	2.3502e-05	0.00466215
CLGN	protein_coding	chr4:141309609-141349122	5.3669	1.7929	-3.18517	1.20727e-06	0.000454449
PPP2R3A	protein_coding	chr3:135684515-135866733	0.76792	0.271157	-3.18315	2.26477e-05	0.00461455
ZNF516	protein_coding	chr18:74070145-74207146	9.55396	2.41816	-3.17626	7.65392e-09	7.00686e-06
PABPC4L	protein_coding	chr4:135117488-135122903	0.780189	0.0659992	-3.12054	1.90324e-05	0.00393337
CCDC149	protein_coding	chr4:24807739-24981826	0.335567	0.0940166	-3.09814	5.41588e-06	0.00145127
RGS16	protein_coding	chr1:182567758-182573543	3.10869	0.765129	-3.09702	0.00034996	0.0324411
HLA-DQA2	protein_coding	chr6:32709119-32714992	2.4509	0.227285	-3.09013	3.37056e-05	0.00588823
CDC14B	protein_coding	chr9:99252523-99382112	0.517351	0.0879717	-3.07831	0.000579049	0.0470682
FAM167A	protein_coding	chr8:11278972-11332224	0.882147	0.140908	-3.06001	0.000243271	0.0246546
ARHGAP42	protein_coding	chr11:100558384-100862668	0.516388	0.082205	-3.05161	3.15934e-05	0.00566683
C3orf14	protein_coding	chr3:62304648-62321888	0.678811	0.143762	-3.02067	1.38806e-05	0.00313504
SYT1	protein_coding	chr12:79257773-79845788	1.00385	0.144815	-3.01416	0.000367098	0.0335948
SPIRE1	protein_coding	chr18:12446511-12658133	3.12991	1.13801	-3.01141	0.000108438	0.0140513
HRK	protein_coding	chr12:117293949-117319246	1.05796	0.139631	-3.00413	0.00144005	0.0879777
UACA	protein_coding	chr15:70946893-71055932	1.09102	0.319204	-2.99714	0.000440322	0.0385678
DPYSL3	protein_coding	chr5:146770374-146889619	7.98461	2.02981	-2.99456	0.000574475	0.0469378
SHROOM4	protein_coding	chrX:50334647-50557302	0.496994	0.0783342	-2.98402	0.000156321	0.0181723
LONRF3	protein_coding	chrX:118108577-118152318	2.58498	0.580318	-2.96257	1.08791e-05	0.00262594
HHIP	protein_coding	chr4:145567173-145666423	0.618319	0.0714892	-2.95624	0.000345738	0.0321536
BICC1	protein_coding	chr10:60272900-60591197	0.78534	0.123959	-2.95042	0.000217023	0.0228742
CDK14	protein_coding	chr7:90095738-90839905	2.2605	0.56432	-2.94237	3.47338e-05	0.00600155
TPPP3	protein_coding	chr16:67423712-67427438	4.59572	0.770096	-2.93764	8.95286e-05	0.012362
EVA1C	protein_coding	chr21:33784314-33887707	0.760948	0.258275	-2.93322	4.06697e-06	0.00115854
CNKSR2	protein_coding	chrX:21392536-21672813	0.844504	0.152919	-2.92011	2.68571e-06	0.000824487
ZNF595	protein_coding	chr4:53179-88099	1.33362	0.325715	-2.91865	0.00032504	0.03059
GNAZ	protein_coding	chr22:23412547-23467224	3.00873	0.277738	-2.90763	7.90729e-05	0.0112625
TMEM150C	protein_coding	chr4:83404323-83483510	0.762754	0.110075	-2.89108	3.57716e-05	0.00614727
OLFML2A	protein_coding	chr9:127539437-127577164	0.910604	0.132117	-2.8845	0.000232219	0.0238402
CES3	protein_coding	chr16:66995140-67009051	0.696969	0.192426	-2.81538	2.46901e-05	0.00475419
DOCK1	protein_coding	chr10:128593978-129250781	9.29379	2.74999	-2.79726	9.26762e-05	0.0125232
HHIP-AS1	antisense	chr4:145564074-145582509	1.03397	0.0572983	-2.78252	5.01374e-06	0.00135499
DCBLD1	protein_coding	chr6:117774980-117891021	0.29959	0.0575428	-2.77917	1.3185e-05	0.00302109
MORC4	protein_coding	chrX:106057101-106243474	0.541018	0.0753315	-2.76787	0.000179187	0.0203809
MTCL1	protein_coding	chr18:8705659-8832776	1.6193	0.305464	-2.75761	0.000157535	0.0182464
PARK2	protein_coding	chr6:161768452-163148803	0.643964	0.161831	-2.73086	1.11049e-05	0.00265401
FZD3	protein_coding	chr8:28351722-28431785	0.372699	0.047019	-2.728	0.00114487	0.0768593
VPREB3	protein_coding	chr22:24094930-24096655	12.5431	0.606769	-2.72713	0.00128675	0.0825292
PLSCR4	protein_coding	chr3:145910126-145968966	0.876651	0.201073	-2.72456	0.000193565	0.0213259
COL4A5	protein_coding	chrX:107683074-107940775	1.58396	1.30692	-2.70238	0.000785549	0.0595509
ARPIN	protein_coding	chr15:90438238-90456188	0.931288	0.191269	-2.69757	3.72763e-05	0.00637123
KCNQ5	protein_coding	chr6:73331520-73908574	6.97758	3.08746	-2.69576	1.30325e-05	0.00302109
PCBP3	protein_coding	chr21:47063608-47362368	1.73668	0.395858	-2.67942	6.61583e-08	4.28225e-05
AMOTL1	protein_coding	chr11:94439597-94609918	12.0161	4.56736	-2.67431	6.60018780765805e-10	1.0395e-06
SLAIN1	protein_coding	chr13:78271989-78338377	8.38365	2.77848	-2.67077	4.16708e-08	2.86441e-05
ZNF521	protein_coding	chr18:22641890-22932154	16.2632	6.98695	-2.65552	3.84913e-06	0.00110645
KRT18	protein_coding	chr12:53342655-53346685	2.75613	0.663939	-2.63409	0.00022122	0.0231622
IGSF9	protein_coding	chr1:159896829-159915394	0.423276	0.0553418	-2.59525	0.000323121	0.03059
CLEC11A	protein_coding	chr19:51226586-51228975	39.9791	5.88066	-2.59355	8.53656e-08	5.29267e-05
SCD5	protein_coding	chr4:83550692-83720010	0.734096	0.24029	-2.59242	0.000119653	0.014779
MRAS	protein_coding	chr3:138066490-138124376	1.00744	0.0621025	-2.58842	0.00148839	0.0898147
DMC1	protein_coding	chr22:38914954-38966291	2.21141	1.54584	-2.58355	4.11151e-05	0.00680659
CHMP4C	protein_coding	chr8:82644669-82671750	0.850961	0.0955539	-2.57895	2.48084e-05	0.00475419
ALDH1L2	protein_coding	chr12:105413562-105478355	0.278718	0.0641187	-2.54163	0.000434346	0.0381501
AUTS2	protein_coding	chr7:69063905-70258054	13.3538	6.48159	-2.53984	3.02865e-05	0.00547233
ITGA2	protein_coding	chr5:52285156-52390609	0.411974	0.0480015	-2.53378	0.00110613	0.0748947
TUSC1	protein_coding	chr9:25676387-25678438	3.72623	2.31194	-2.52946	0.000639375	0.0507966
IL7	protein_coding	chr8:79587978-79717758	1.13836	0.466315	-2.52918	0.00098999	0.0696441
KCNIP3	protein_coding	chr2:95963052-96051831	0.47706	0.155471	-2.52358	0.00019788	0.0215378
MARC1	protein_coding	chr1:220960101-220992999	1.05152	0.33967	-2.52164	5.2167e-05	0.00812572
LINC01694	lincRNA	chr21:47013568-47022970	0.456592	0.175031	-2.51936	0.00142607	0.0879777
ABCA3	protein_coding	chr16:2325882-2390747	0.910749	0.217579	-2.49153	3.33263e-05	0.00586484
SLC22A17	protein_coding	chr14:23815515-23822121	1.62389	0.596106	-2.48183	0.000119338	0.014779
DCBLD2	protein_coding	chr3:98514785-98620533	1.27189	0.302835	-2.46456	1.1792e-06	0.000449234
GSTT1	protein_coding	chr22:24376133-24384680	0.69755	0.0471629	-2.45854	0.00081941	0.0613318
ASAP2	protein_coding	chr2:9346894-9545812	4.04257	1.59105	-2.45673	0.000105996	0.0137925
CAV1	protein_coding	chr7:116164839-116201238	0.425576	0.0635277	-2.45198	0.000103266	0.0136623
ZNF418	protein_coding	chr19:58433252-58446761	4.68882	2.03442	-2.43407	1.45259e-05	0.00319722
FCGR2A	protein_coding	chr1:161475220-161493803	5.01429	1.0958	-2.4332	7.3738e-05	0.0108699
INSR	protein_coding	chr19:7112266-7294045	6.98565	1.79331	-2.42748	7.83545e-11	1.76969e-07
FJX1	protein_coding	chr11:35639967-35642416	0.596282	0.0685559	-2.39667	0.00012185	0.0149447
SLC2A13	protein_coding	chr12:40148823-40499891	0.866104	0.388813	-2.38985	5.17919e-05	0.00810723
HECTD2	protein_coding	chr10:93169037-93274586	0.288062	0.106785	-2.37077	0.000204085	0.0218752
UNC13B	protein_coding	chr9:35161989-35405335	1.16262	0.378268	-2.37072	2.30511e-05	0.00461455
FRMD6	protein_coding	chr14:51955818-52197445	0.887437	0.393056	-2.37047	0.000497483	0.0421059
PCSK5	protein_coding	chr9:78505560-78977255	0.834031	0.304652	-2.36348	0.000116288	0.0145336
HOXA10	protein_coding	chr7:27210210-27219880	4.46496	2.4924	-2.36064	0.000299757	0.0291066
HTR7	protein_coding	chr10:92500580-92617455	0.742642	0.0768749	-2.35467	0.00069159	0.0544651
TRPC1	protein_coding	chr3:142442916-142526730	0.619461	0.284079	-2.34666	0.000908127	0.06541
SERPINE2	protein_coding	chr2:224839829-224904036	5.778	1.49018	-2.33766	2.85068e-06	0.000850362
SLC2A10	protein_coding	chr20:45338126-45364986	0.613437	0.401556	-2.33756	0.000604052	0.0484775
FAM134B	protein_coding	chr5:16473147-16617167	3.95801	1.12114	-2.32091	0.00133845	0.0849836
GATM	protein_coding	chr15:45653322-45694525	0.850958	0.391814	-2.31165	0.000764683	0.0585455
ZNF112	protein_coding	chr19:44830708-44871377	0.576157	0.240696	-2.29594	0.000879078	0.0643436
SPATS2L	protein_coding	chr2:201170604-201346986	3.20335	1.13968	-2.28936	4.0486e-05	0.00677338
PLEKHG1	protein_coding	chr6:150921019-151164801	2.93332	0.923133	-2.28682	0.000944696	0.0669349
CD9	protein_coding	chr12:6308881-6347437	7.06443	1.17783	-2.26068	0.000168989	0.0194306
PPM1L	protein_coding	chr3:160473390-160796695	2.54994	0.640058	-2.24189	6.63599e-08	4.28225e-05
RPL39L	protein_coding	chr3:186838736-186898696	4.90207	1.95631	-2.23966	0.000996613	0.0698734
AKAP6	protein_coding	chr14:32798479-33306887	0.200387	0.108923	-2.22182	0.000562883	0.0463499
SLC7A3	protein_coding	chrX:70145432-70150975	0.365649	0.0182095	-2.21665	5.62121e-05	0.00871287
RP11-16N11.2	antisense	chr3:160471216-160472930	0.843894	0.214299	-2.18108	0.000446095	0.0388582
ZDHHC1	protein_coding	chr16:67428322-67450736	1.08073	0.405675	-2.17954	0.00010419	0.0136787
PECR	protein_coding	chr2:216861052-216947678	1.13171	0.335455	-2.15491	0.000916336	0.0655533
ALDOC	protein_coding	chr17:26900133-26904282	2.70674	1.20579	-2.1513	7.50853e-05	0.010941
DST	protein_coding	chr6:56322785-56819426	4.54159	2.11142	-2.15054	0.000130706	0.0157745
LINC01475	lincRNA	chr10:101286107-101290934	1.07038	0.135903	-2.14114	0.000115026	0.0145336
CREB5	protein_coding	chr7:28338940-28865511	2.11615	1.08503	-2.1266	0.000215309	0.0227695
RP1-232L24.3	lincRNA	chr6:80130014-80131022	2.0002	0.179186	-2.11952	0.000276768	0.027607
BAG2	protein_coding	chr6:57037124-57054631	1.97793	1.04965	-2.11055	0.000396517	0.0354177
SLC22A15	protein_coding	chr1:116519119-116612675	2.94124	1.07575	-2.08867	6.75336e-06	0.0017648
CCL28	protein_coding	chr5:43376747-43412493	1.80649	1.01342	-2.05837	0.000392954	0.0351989
F2RL1	protein_coding	chr5:76114758-76131140	3.99115	1.13349	-2.02335	0.0016536	0.0971419
TSPYL5	protein_coding	chr8:98285702-98290192	4.71863	2.20324	-1.99769	0.000181379	0.0204555
NAP1L3	protein_coding	chrX:92925929-92928567	6.48448	2.13428	-1.97976	2.90688e-05	0.0052825
PRDX2	protein_coding	chr19:12907634-12912673	19.362	9.42233	-1.97976	8.14934e-05	0.0115037
RASAL2	protein_coding	chr1:178063276-178453282	1.15379	0.488727	-1.97904	2.38858e-05	0.00466215
FAM127B	protein_coding	chrX:134184962-134186226	6.87675	2.38862	-1.95448	1.60433e-05	0.00342762
IGHV4-34	IG_V_gene	chr14:106829594-106830076	2.27379	0.101142	-1.95285	0.0001381	0.0165407
HFM1	protein_coding	chr1:91726323-91870426	0.88986	0.569878	-1.94453	0.00100889	0.0702664
INTU	protein_coding	chr4:128544426-128647892	0.453715	0.215955	-1.91435	0.000253329	0.0255919
RP11-132A1.4	antisense	chr7:100951627-100954266	1.61202	0.220948	-1.90731	0.00154017	0.0918872
ANXA5	protein_coding	chr4:122589110-122618268	25.0277	14.4587	-1.90419	0.000139251	0.0166155
SGCB	protein_coding	chr4:52886872-52904648	0.252797	0.0444406	-1.89768	0.00146664	0.08892
NT5DC3	protein_coding	chr12:104164231-104234975	1.6907	0.616415	-1.89528	1.99916e-07	9.98818e-05
SETD7	protein_coding	chr4:140417095-140527853	3.53045	1.06266	-1.88113	2.38193e-07	0.000115872
KLHL32	protein_coding	chr6:97372496-97588630	0.239404	0.0462894	-1.86698	0.00149951	0.0903134
GSTA4	protein_coding	chr6:52842746-52860176	1.7799	0.687518	-1.85916	0.00143884	0.0879777
MAP9	protein_coding	chr4:156263810-156298122	2.32243	1.01245	-1.84569	0.000758109	0.0582256
FAM127A	protein_coding	chrX:134166396-134167576	14.3368	6.81076	-1.84327	9.70982e-05	0.0130272
CTIF	protein_coding	chr18:46065417-46389588	3.98096	1.66475	-1.80789	1.12472e-05	0.00265401
TUBB6	protein_coding	chr18:12307668-12344319	33.8281	13.2776	-1.77861	1.68152e-08	1.36332e-05
CAPN2	protein_coding	chr1:223889295-223963720	9.87458	4.68842	-1.76338	9.19196e-05	0.0125232
BTG3	protein_coding	chr21:18965971-18985265	12.7754	5.06387	-1.75155	1.22549e-05	0.00287037
PELO	protein_coding	chr5:52083774-52099880	2.31481	1.19957	-1.72476	0.000196867	0.0215378
KANSL1L	protein_coding	chr2:210886147-211036107	2.80703	0.87831	-1.72243	1.44232e-07	7.72983e-05
NRSN2	protein_coding	chr20:327426-340304	2.85329	1.55711	-1.71667	0.00104072	0.0718504
RP11-453A12.1	lincRNA	chr17:60885861-60913732	0.324722	0.00840535	-1.71226	0.000307115	0.0296972
XRRA1	protein_coding	chr11:74518784-74660245	2.56525	1.42207	-1.70063	2.64597e-05	0.0049215
TIAM1	protein_coding	chr21:32490734-32932290	3.73845	1.3104	-1.68211	0.000145046	0.0172284
TH	protein_coding	chr11:2185159-2193107	0.139853	0	-1.67737	5.17299e-05	0.00810723
ZNF98	protein_coding	chr19:22573821-22715287	0.143725	0.0115634	-1.6651	0.000226692	0.0234248
EFNB1	protein_coding	chrX:68048840-68061990	4.27265	1.85251	-1.65976	0.00105758	0.0725604
MOK	protein_coding	chr14:102690837-102771537	1.96784	0.820011	-1.65051	2.82829e-05	0.00519945
WHRN	protein_coding	chr9:117164360-117267730	8.0369	2.60644	-1.60853	0.000541427	0.0449342
RP11-532F6.3	lincRNA	chr6:708592-711405	0.153631	0.00356233	-1.60275	0.000219608	0.0230698
BACH2	protein_coding	chr6:90636248-91006627	6.36758	1.93446	-1.59832	0.000128195	0.0155308
JAZF1	protein_coding	chr7:27870192-28220362	2.27788	1.39039	-1.59015	0.00125835	0.0812023
IGHV3-15	IG_V_gene	chr14:106610313-106610852	1.09809	0.0132903	-1.55821	0.000802336	0.0604044
DNAH14	protein_coding	chr1:225083964-225586994	1.44975	0.743231	-1.51261	4.36074e-06	0.00122024
PLXDC2	protein_coding	chr10:20105168-20578785	5.86306	3.21724	-1.50197	0.00144125	0.0879777
TPD52	protein_coding	chr8:80946980-81143467	2.33692	0.962919	-1.49634	9.52752e-07	0.000381342
ARHGEF10	protein_coding	chr8:1772142-1906807	0.949547	0.491212	-1.49119	0.00124114	0.0802552
KLF9	protein_coding	chr9:72999513-73029540	14.9802	5.56072	-1.46992	0.000115796	0.0145336
EXOC6B	protein_coding	chr2:72403113-73053170	2.23451	0.812134	-1.4469	1.68132e-05	0.00354421
CAST	protein_coding	chr5:95860971-96115299	13.8275	6.40201	-1.42587	7.74792e-06	0.00200811
CYP4V2	protein_coding	chr4:187112674-187134610	2.64869	1.71888	-1.4251	0.00118727	0.0782114
IRS1	protein_coding	chr2:227596033-227664475	0.614142	0.359904	-1.41177	0.000787232	0.0595509
PLEKHG4	protein_coding	chr16:67311413-67323402	2.23332	0.906305	-1.39498	7.66322e-05	0.0110141
IGHV4-31	IG_V_gene	chr14:106805209-106805716	1.01788	0.0219152	-1.39274	0.00122146	0.0793074
ARHGAP5	protein_coding	chr14:32545320-32628934	13.6511	8.48519	-1.39083	3.66178e-06	0.00106225
MOCS2	protein_coding	chr5:52391509-52405893	2.28366	1.20017	-1.38946	0.000145477	0.0172284
TBC1D4	protein_coding	chr13:75858801-76056250	5.82458	2.67739	-1.38864	0.000538768	0.0448311
PHGDH	protein_coding	chr1:120202421-120286838	11.9425	4.39132	-1.38038	1.31758e-05	0.00302109
RNF223	protein_coding	chr1:1006346-1009687	0.105988	0.00355724	-1.36684	0.00132389	0.0843982
KCNA3	protein_coding	chr1:111215087-111217655	9.10826	3.04921	-1.35123	0.000545041	0.0451157
C1orf21	protein_coding	chr1:184356192-184598154	2.95638	1.57105	-1.33785	4.81646e-06	0.0013129
CTD-2017C7.1	antisense	chr14:102299772-102305868	0.325696	0.0167159	-1.3278	0.0016769	0.0981921
PCGF5	protein_coding	chr10:92922769-93044088	7.39936	3.28319	-1.312	1.0173e-07	6.0685e-05
KBTBD11	protein_coding	chr8:1922044-1955102	4.36315	2.02192	-1.29473	0.000344617	0.0321439
CLEC4G	protein_coding	chr19:7793843-7798792	0.218355	0.00385739	-1.29376	0.00143887	0.0879777
ZNF814	protein_coding	chr19:58360099-58400442	2.49755	1.18033	-1.26583	1.40612e-05	0.0031533
EPHB4	protein_coding	chr7:100400187-100425143	6.0103	2.48002	-1.25129	8.37106e-06	0.00213462
IGF1R	protein_coding	chr15:99192200-99507759	12.4603	6.08042	-1.24627	6.20301e-05	0.00938465
PKIG	protein_coding	chr20:43160426-43252888	17.0203	9.61227	-1.23982	0.000823178	0.0613318
C1orf198	protein_coding	chr1:230972865-231005335	4.58997	2.41497	-1.23967	0.000163615	0.0188814
MARVELD1	protein_coding	chr10:99472930-99477909	18.1532	8.91031	-1.23263	1.97383e-06	0.00063043
CCDC112	protein_coding	chr5:114602885-114632528	11.7362	7.55621	-1.2155	0.00106018	0.0725604
ANKRD13B	protein_coding	chr17:27916787-27941779	6.50779	3.37217	-1.21409	3.45471e-07	0.000156117
MPP7	protein_coding	chr10:28339922-28623415	4.23189	1.93033	-1.19607	0.000241041	0.0245071
CTSF	protein_coding	chr11:66330934-66336312	3.38249	1.95916	-1.15261	0.00136789	0.0859897
LRRC26	protein_coding	chr9:140063210-140064503	0.228757	0.00314766	-1.13438	0.00163763	0.0966081
COL10A1	protein_coding	chr6:116440086-116479910	0.0288686	0.00162968	-1.11005	0.000896873	0.0651934
PITPNM2	protein_coding	chr12:123468027-123634562	6.58998	3.19785	-1.0679	0.00133195	0.0847407
PANX1	protein_coding	chr11:93862094-93915138	11.9326	6.59702	-1.06774	0.000724459	0.0565615
MCUB	protein_coding	chr4:110481361-110609882	11.69	7.06898	-1.04924	3.9136e-05	0.00661084
LINC01781	lincRNA	chr1:81001440-81112473	0.244412	0	-1.04612	0.00116144	0.0774784
FHL1	protein_coding	chrX:135228861-135293518	10.7902	6.86869	-1.04182	0.00143701	0.0879777
TMBIM1	protein_coding	chr2:219138915-219157309	12.3846	6.46353	-1.03956	0.000929137	0.0663026
MYO5A	protein_coding	chr15:52599480-52821247	6.81403	3.65232	-0.948359	1.82522e-06	0.00060118
DSTN	protein_coding	chr20:17550508-17590564	19.6563	11.9589	-0.942619	0.000487533	0.0416643
TGIF1	protein_coding	chr18:3411606-3459976	3.89111	2.65474	-0.927194	0.00114148	0.0767949
JMY	protein_coding	chr5:78532012-78623038	10.2562	6.17263	-0.893465	4.08713e-05	0.00680185
HMGN5	protein_coding	chrX:80369200-80457441	29.3045	17.293	-0.889395	0.00150843	0.0903385
BSPRY	protein_coding	chr9:116111821-116133513	12.2176	8.04758	-0.834855	0.00019428	0.0213304
ZNF219	protein_coding	chr14:21558205-21572881	7.01326	4.73908	-0.82414	0.00102134	0.070897
ZC4H2	protein_coding	chrX:64135682-64254593	4.28561	2.67239	-0.813523	0.000493979	0.0419882
MAP3K20	protein_coding	chr2:173940163-174132738	4.72101	3.05926	-0.723861	7.40855e-05	0.0108699
CYFIP1	protein_coding	chr15:22892005-23006016	9.13892	5.85584	-0.712614	0.000300087	0.0291066
PAK4	protein_coding	chr19:39616410-39673456	4.4471	2.72079	-0.701407	0.0016559	0.0971419
KCTD3	protein_coding	chr1:215740735-215795149	8.88455	5.88041	-0.677119	1.84742e-06	0.000602222
CSNK1E	protein_coding	chr22:38686697-38714089	8.75242	6.38733	-0.669296	0.00052089	0.0436245
CCDC6	protein_coding	chr10:61548521-61666414	25.8384	17.5722	-0.658799	8.10739e-05	0.0114958
SLC25A1	protein_coding	chr22:19163088-19166343	15.3455	10.0362	-0.655646	0.000727983	0.0566966
FAM213A	protein_coding	chr10:82167585-82196871	5.69602	4.07106	-0.652395	0.00102681	0.0710454
RUNX1	protein_coding	chr21:36160098-37376965	31.5818	20.8432	-0.639467	4.4722e-06	0.00124045
VEZF1	protein_coding	chr17:56048908-56065620	23.3007	15.435	-0.628912	0.000840977	0.0621301
MRM3	protein_coding	chr17:685513-695749	16.102	11.3062	-0.612588	0.000903903	0.0652544
ZFAS1	antisense	chr20:47894715-47912275	60.9098	45.5641	-0.60185	5.03511e-05	0.0079605
RNASEH2C	protein_coding	chr11:65482367-65488418	14.487	10.601	-0.587314	0.000912773	0.0654824
